# Supplementary material
Source: publisher figshare collection journal article supplement (https://gsajournals.figshare.com/ndownloader/files/37493446)
Supplement: Supplementary file 1 [file 37493446]

NODE_53_length_559_cov_100.445435	AUGUSTUS	gene	1	356	0.92	+	.	g1
NODE_53_length_559_cov_100.445435	AUGUSTUS	transcript	1	356	0.92	+	.	g1.t1
NODE_53_length_559_cov_100.445435	AUGUSTUS	CDS	1	356	0.92	+	2	transcript_id "g1.t1"; gene_id "g1";
NODE_53_length_559_cov_100.445435	AUGUSTUS	stop_codon	354	356	.	+	0	transcript_id "g1.t1"; gene_id "g1";
NODE_159_length_3237_cov_14.107507	AUGUSTUS	gene	3101	3321	0.74	-	.	g2
NODE_159_length_3237_cov_14.107507	AUGUSTUS	transcript	3101	3321	0.74	-	.	g2.t1
NODE_159_length_3237_cov_14.107507	AUGUSTUS	stop_codon	3101	3103	.	-	0	transcript_id "g2.t1"; gene_id "g2";
NODE_159_length_3237_cov_14.107507	AUGUSTUS	CDS	3101	3321	0.74	-	2	transcript_id "g2.t1"; gene_id "g2";
NODE_311_length_122_cov_167.827866	AUGUSTUS	gene	1	135	0.7	-	.	g3
NODE_311_length_122_cov_167.827866	AUGUSTUS	transcript	1	135	0.7	-	.	g3.t1
NODE_311_length_122_cov_167.827866	AUGUSTUS	intron	1	65	0.81	-	.	transcript_id "g3.t1"; gene_id "g3";
NODE_311_length_122_cov_167.827866	AUGUSTUS	CDS	66	135	0.7	-	0	transcript_id "g3.t1"; gene_id "g3";
NODE_311_length_122_cov_167.827866	AUGUSTUS	start_codon	133	135	.	-	0	transcript_id "g3.t1"; gene_id "g3";
NODE_398_length_97_cov_277.216492	AUGUSTUS	gene	1	181	0.69	-	.	g4
NODE_398_length_97_cov_277.216492	AUGUSTUS	transcript	1	181	0.69	-	.	g4.t1
NODE_398_length_97_cov_277.216492	AUGUSTUS	CDS	1	181	0.69	-	2	transcript_id "g4.t1"; gene_id "g4";
NODE_399_length_121307_cov_32.084396	AUGUSTUS	gene	1810	8449	0.71	+	.	g5
NODE_399_length_121307_cov_32.084396	AUGUSTUS	transcript	1810	8449	0.71	+	.	g5.t1
NODE_399_length_121307_cov_32.084396	AUGUSTUS	start_codon	1810	1812	.	+	0	transcript_id "g5.t1"; gene_id "g5";
NODE_399_length_121307_cov_32.084396	AUGUSTUS	intron	2276	4994	0.98	+	.	transcript_id "g5.t1"; gene_id "g5";
NODE_399_length_121307_cov_32.084396	AUGUSTUS	intron	5114	5650	1	+	.	transcript_id "g5.t1"; gene_id "g5";
NODE_399_length_121307_cov_32.084396	AUGUSTUS	intron	5782	5851	0.99	+	.	transcript_id "g5.t1"; gene_id "g5";
NODE_399_length_121307_cov_32.084396	AUGUSTUS	intron	6746	8376	0.74	+	.	transcript_id "g5.t1"; gene_id "g5";
NODE_399_length_121307_cov_32.084396	AUGUSTUS	CDS	1810	2275	0.99	+	0	transcript_id "g5.t1"; gene_id "g5";
NODE_399_length_121307_cov_32.084396	AUGUSTUS	CDS	4995	5113	1	+	2	transcript_id "g5.t1"; gene_id "g5";
NODE_399_length_121307_cov_32.084396	AUGUSTUS	CDS	5651	5781	0.99	+	0	transcript_id "g5.t1"; gene_id "g5";
NODE_399_length_121307_cov_32.084396	AUGUSTUS	CDS	5852	6745	1	+	1	transcript_id "g5.t1"; gene_id "g5";
NODE_399_length_121307_cov_32.084396	AUGUSTUS	CDS	8377	8449	0.91	+	1	transcript_id "g5.t1"; gene_id "g5";
NODE_399_length_121307_cov_32.084396	AUGUSTUS	stop_codon	8447	8449	.	+	0	transcript_id "g5.t1"; gene_id "g5";
NODE_399_length_121307_cov_32.084396	AUGUSTUS	gene	12595	15483	0.53	+	.	g6
NODE_399_length_121307_cov_32.084396	AUGUSTUS	transcript	12595	15483	0.53	+	.	g6.t1
NODE_399_length_121307_cov_32.084396	AUGUSTUS	start_codon	12595	12597	.	+	0	transcript_id "g6.t1"; gene_id "g6";
NODE_399_length_121307_cov_32.084396	AUGUSTUS	intron	12615	12975	0.56	+	.	transcript_id "g6.t1"; gene_id "g6";
NODE_399_length_121307_cov_32.084396	AUGUSTUS	intron	13235	13321	0.99	+	.	transcript_id "g6.t1"; gene_id "g6";
NODE_399_length_121307_cov_32.084396	AUGUSTUS	intron	13529	13601	1	+	.	transcript_id "g6.t1"; gene_id "g6";
NODE_399_length_121307_cov_32.084396	AUGUSTUS	intron	13894	13960	1	+	.	transcript_id "g6.t1"; gene_id "g6";
NODE_399_length_121307_cov_32.084396	AUGUSTUS	intron	14314	14813	0.98	+	.	transcript_id "g6.t1"; gene_id "g6";
NODE_399_length_121307_cov_32.084396	AUGUSTUS	intron	15100	15184	0.99	+	.	transcript_id "g6.t1"; gene_id "g6";
NODE_399_length_121307_cov_32.084396	AUGUSTUS	CDS	12595	12614	0.55	+	0	transcript_id "g6.t1"; gene_id "g6";
NODE_399_length_121307_cov_32.084396	AUGUSTUS	CDS	12976	13234	1	+	1	transcript_id "g6.t1"; gene_id "g6";
NODE_399_length_121307_cov_32.084396	AUGUSTUS	CDS	13322	13528	0.99	+	0	transcript_id "g6.t1"; gene_id "g6";
NODE_399_length_121307_cov_32.084396	AUGUSTUS	CDS	13602	13893	1	+	0	transcript_id "g6.t1"; gene_id "g6";
NODE_399_length_121307_cov_32.084396	AUGUSTUS	CDS	13961	14313	0.99	+	2	transcript_id "g6.t1"; gene_id "g6";
NODE_399_length_121307_cov_32.084396	AUGUSTUS	CDS	14814	15099	0.99	+	0	transcript_id "g6.t1"; gene_id "g6";
NODE_399_length_121307_cov_32.084396	AUGUSTUS	CDS	15185	15483	0.99	+	2	transcript_id "g6.t1"; gene_id "g6";
NODE_399_length_121307_cov_32.084396	AUGUSTUS	stop_codon	15481	15483	.	+	0	transcript_id "g6.t1"; gene_id "g6";
NODE_399_length_121307_cov_32.084396	AUGUSTUS	gene	16565	17414	0.99	-	.	g7
NODE_399_length_121307_cov_32.084396	AUGUSTUS	transcript	16565	17414	0.99	-	.	g7.t1
NODE_399_length_121307_cov_32.084396	AUGUSTUS	stop_codon	16565	16567	.	-	0	transcript_id "g7.t1"; gene_id "g7";
NODE_399_length_121307_cov_32.084396	AUGUSTUS	intron	16808	17210	0.99	-	.	transcript_id "g7.t1"; gene_id "g7";
NODE_399_length_121307_cov_32.084396	AUGUSTUS	CDS	16565	16807	0.99	-	0	transcript_id "g7.t1"; gene_id "g7";
NODE_399_length_121307_cov_32.084396	AUGUSTUS	CDS	17211	17414	1	-	0	transcript_id "g7.t1"; gene_id "g7";
NODE_399_length_121307_cov_32.084396	AUGUSTUS	start_codon	17412	17414	.	-	0	transcript_id "g7.t1"; gene_id "g7";
NODE_399_length_121307_cov_32.084396	AUGUSTUS	gene	19495	25932	0.33	+	.	g8
NODE_399_length_121307_cov_32.084396	AUGUSTUS	transcript	19495	25932	0.33	+	.	g8.t1
NODE_399_length_121307_cov_32.084396	AUGUSTUS	start_codon	19495	19497	.	+	0	transcript_id "g8.t1"; gene_id "g8";
NODE_399_length_121307_cov_32.084396	AUGUSTUS	intron	19631	19710	1	+	.	transcript_id "g8.t1"; gene_id "g8";
NODE_399_length_121307_cov_32.084396	AUGUSTUS	intron	24008	24095	1	+	.	transcript_id "g8.t1"; gene_id "g8";
NODE_399_length_121307_cov_32.084396	AUGUSTUS	intron	24196	24270	0.99	+	.	transcript_id "g8.t1"; gene_id "g8";
NODE_399_length_121307_cov_32.084396	AUGUSTUS	intron	24352	24437	1	+	.	transcript_id "g8.t1"; gene_id "g8";
NODE_399_length_121307_cov_32.084396	AUGUSTUS	intron	24563	25307	1	+	.	transcript_id "g8.t1"; gene_id "g8";
NODE_399_length_121307_cov_32.084396	AUGUSTUS	intron	25390	25464	0.53	+	.	transcript_id "g8.t1"; gene_id "g8";
NODE_399_length_121307_cov_32.084396	AUGUSTUS	CDS	19495	19630	0.93	+	0	transcript_id "g8.t1"; gene_id "g8";
NODE_399_length_121307_cov_32.084396	AUGUSTUS	CDS	19711	24007	0.76	+	2	transcript_id "g8.t1"; gene_id "g8";
NODE_399_length_121307_cov_32.084396	AUGUSTUS	CDS	24096	24195	0.99	+	1	transcript_id "g8.t1"; gene_id "g8";
NODE_399_length_121307_cov_32.084396	AUGUSTUS	CDS	24271	24351	0.99	+	0	transcript_id "g8.t1"; gene_id "g8";
NODE_399_length_121307_cov_32.084396	AUGUSTUS	CDS	24438	24562	1	+	0	transcript_id "g8.t1"; gene_id "g8";
NODE_399_length_121307_cov_32.084396	AUGUSTUS	CDS	25308	25389	0.53	+	1	transcript_id "g8.t1"; gene_id "g8";
NODE_399_length_121307_cov_32.084396	AUGUSTUS	CDS	25465	25932	0.78	+	0	transcript_id "g8.t1"; gene_id "g8";
NODE_399_length_121307_cov_32.084396	AUGUSTUS	stop_codon	25930	25932	.	+	0	transcript_id "g8.t1"; gene_id "g8";
NODE_399_length_121307_cov_32.084396	AUGUSTUS	gene	28892	34744	0.47	-	.	g9
NODE_399_length_121307_cov_32.084396	AUGUSTUS	transcript	28892	34744	0.47	-	.	g9.t1
NODE_399_length_121307_cov_32.084396	AUGUSTUS	stop_codon	28892	28894	.	-	0	transcript_id "g9.t1"; gene_id "g9";
NODE_399_length_121307_cov_32.084396	AUGUSTUS	intron	29596	29706	1	-	.	transcript_id "g9.t1"; gene_id "g9";
NODE_399_length_121307_cov_32.084396	AUGUSTUS	intron	30637	31416	0.97	-	.	transcript_id "g9.t1"; gene_id "g9";
NODE_399_length_121307_cov_32.084396	AUGUSTUS	intron	31724	31804	1	-	.	transcript_id "g9.t1"; gene_id "g9";
NODE_399_length_121307_cov_32.084396	AUGUSTUS	intron	33983	34064	1	-	.	transcript_id "g9.t1"; gene_id "g9";
NODE_399_length_121307_cov_32.084396	AUGUSTUS	intron	34185	34621	0.94	-	.	transcript_id "g9.t1"; gene_id "g9";
NODE_399_length_121307_cov_32.084396	AUGUSTUS	CDS	28892	29595	0.96	-	2	transcript_id "g9.t1"; gene_id "g9";
NODE_399_length_121307_cov_32.084396	AUGUSTUS	CDS	29707	30636	0.97	-	2	transcript_id "g9.t1"; gene_id "g9";
NODE_399_length_121307_cov_32.084396	AUGUSTUS	CDS	31417	31723	1	-	0	transcript_id "g9.t1"; gene_id "g9";
NODE_399_length_121307_cov_32.084396	AUGUSTUS	CDS	31805	33982	1	-	0	transcript_id "g9.t1"; gene_id "g9";
NODE_399_length_121307_cov_32.084396	AUGUSTUS	CDS	34065	34184	0.94	-	0	transcript_id "g9.t1"; gene_id "g9";
NODE_399_length_121307_cov_32.084396	AUGUSTUS	CDS	34622	34744	0.54	-	0	transcript_id "g9.t1"; gene_id "g9";
NODE_399_length_121307_cov_32.084396	AUGUSTUS	start_codon	34742	34744	.	-	0	transcript_id "g9.t1"; gene_id "g9";
NODE_399_length_121307_cov_32.084396	AUGUSTUS	gene	39265	55229	0.54	-	.	g10
NODE_399_length_121307_cov_32.084396	AUGUSTUS	transcript	39265	55229	0.54	-	.	g10.t1
NODE_399_length_121307_cov_32.084396	AUGUSTUS	stop_codon	39265	39267	.	-	0	transcript_id "g10.t1"; gene_id "g10";
NODE_399_length_121307_cov_32.084396	AUGUSTUS	intron	39486	39566	1	-	.	transcript_id "g10.t1"; gene_id "g10";
NODE_399_length_121307_cov_32.084396	AUGUSTUS	intron	39706	39791	1	-	.	transcript_id "g10.t1"; gene_id "g10";
NODE_399_length_121307_cov_32.084396	AUGUSTUS	intron	40046	40178	1	-	.	transcript_id "g10.t1"; gene_id "g10";
NODE_399_length_121307_cov_32.084396	AUGUSTUS	intron	40317	40400	1	-	.	transcript_id "g10.t1"; gene_id "g10";
NODE_399_length_121307_cov_32.084396	AUGUSTUS	intron	40553	40630	1	-	.	transcript_id "g10.t1"; gene_id "g10";
NODE_399_length_121307_cov_32.084396	AUGUSTUS	intron	41830	42788	0.88	-	.	transcript_id "g10.t1"; gene_id "g10";
NODE_399_length_121307_cov_32.084396	AUGUSTUS	intron	44474	44692	0.95	-	.	transcript_id "g10.t1"; gene_id "g10";
NODE_399_length_121307_cov_32.084396	AUGUSTUS	intron	45242	45731	0.82	-	.	transcript_id "g10.t1"; gene_id "g10";
NODE_399_length_121307_cov_32.084396	AUGUSTUS	intron	46180	46295	1	-	.	transcript_id "g10.t1"; gene_id "g10";
NODE_399_length_121307_cov_32.084396	AUGUSTUS	intron	49040	50561	0.99	-	.	transcript_id "g10.t1"; gene_id "g10";
NODE_399_length_121307_cov_32.084396	AUGUSTUS	intron	50681	50775	0.88	-	.	transcript_id "g10.t1"; gene_id "g10";
NODE_399_length_121307_cov_32.084396	AUGUSTUS	intron	50995	51060	0.99	-	.	transcript_id "g10.t1"; gene_id "g10";
NODE_399_length_121307_cov_32.084396	AUGUSTUS	intron	51173	51316	0.97	-	.	transcript_id "g10.t1"; gene_id "g10";
NODE_399_length_121307_cov_32.084396	AUGUSTUS	intron	52218	52312	1	-	.	transcript_id "g10.t1"; gene_id "g10";
NODE_399_length_121307_cov_32.084396	AUGUSTUS	intron	52953	53868	1	-	.	transcript_id "g10.t1"; gene_id "g10";
NODE_399_length_121307_cov_32.084396	AUGUSTUS	CDS	39265	39485	1	-	2	transcript_id "g10.t1"; gene_id "g10";
NODE_399_length_121307_cov_32.084396	AUGUSTUS	CDS	39567	39705	1	-	0	transcript_id "g10.t1"; gene_id "g10";
NODE_399_length_121307_cov_32.084396	AUGUSTUS	CDS	39792	40045	1	-	2	transcript_id "g10.t1"; gene_id "g10";
NODE_399_length_121307_cov_32.084396	AUGUSTUS	CDS	40179	40316	1	-	2	transcript_id "g10.t1"; gene_id "g10";
NODE_399_length_121307_cov_32.084396	AUGUSTUS	CDS	40401	40552	1	-	1	transcript_id "g10.t1"; gene_id "g10";
NODE_399_length_121307_cov_32.084396	AUGUSTUS	CDS	40631	41829	0.88	-	0	transcript_id "g10.t1"; gene_id "g10";
NODE_399_length_121307_cov_32.084396	AUGUSTUS	CDS	42789	44473	0.89	-	2	transcript_id "g10.t1"; gene_id "g10";
NODE_399_length_121307_cov_32.084396	AUGUSTUS	CDS	44693	45241	0.78	-	2	transcript_id "g10.t1"; gene_id "g10";
NODE_399_length_121307_cov_32.084396	AUGUSTUS	CDS	45732	46179	1	-	0	transcript_id "g10.t1"; gene_id "g10";
NODE_399_length_121307_cov_32.084396	AUGUSTUS	CDS	46296	49039	0.99	-	2	transcript_id "g10.t1"; gene_id "g10";
NODE_399_length_121307_cov_32.084396	AUGUSTUS	CDS	50562	50680	0.88	-	1	transcript_id "g10.t1"; gene_id "g10";
NODE_399_length_121307_cov_32.084396	AUGUSTUS	CDS	50776	50994	0.99	-	1	transcript_id "g10.t1"; gene_id "g10";
NODE_399_length_121307_cov_32.084396	AUGUSTUS	CDS	51061	51172	0.97	-	2	transcript_id "g10.t1"; gene_id "g10";
NODE_399_length_121307_cov_32.084396	AUGUSTUS	CDS	51317	52217	1	-	0	transcript_id "g10.t1"; gene_id "g10";
NODE_399_length_121307_cov_32.084396	AUGUSTUS	CDS	52313	52952	1	-	1	transcript_id "g10.t1"; gene_id "g10";
NODE_399_length_121307_cov_32.084396	AUGUSTUS	CDS	53869	55229	0.95	-	0	transcript_id "g10.t1"; gene_id "g10";
NODE_399_length_121307_cov_32.084396	AUGUSTUS	start_codon	55227	55229	.	-	0	transcript_id "g10.t1"; gene_id "g10";
NODE_399_length_121307_cov_32.084396	AUGUSTUS	gene	88279	88563	0.64	-	.	g11
NODE_399_length_121307_cov_32.084396	AUGUSTUS	transcript	88279	88563	0.64	-	.	g11.t1
NODE_399_length_121307_cov_32.084396	AUGUSTUS	stop_codon	88279	88281	.	-	0	transcript_id "g11.t1"; gene_id "g11";
NODE_399_length_121307_cov_32.084396	AUGUSTUS	CDS	88279	88563	0.64	-	0	transcript_id "g11.t1"; gene_id "g11";
NODE_399_length_121307_cov_32.084396	AUGUSTUS	start_codon	88561	88563	.	-	0	transcript_id "g11.t1"; gene_id "g11";
NODE_399_length_121307_cov_32.084396	AUGUSTUS	gene	116732	118776	0.41	-	.	g12
NODE_399_length_121307_cov_32.084396	AUGUSTUS	transcript	116732	118776	0.41	-	.	g12.t1
NODE_399_length_121307_cov_32.084396	AUGUSTUS	stop_codon	116732	116734	.	-	0	transcript_id "g12.t1"; gene_id "g12";
NODE_399_length_121307_cov_32.084396	AUGUSTUS	intron	116983	118117	0.46	-	.	transcript_id "g12.t1"; gene_id "g12";
NODE_399_length_121307_cov_32.084396	AUGUSTUS	intron	118409	118467	0.85	-	.	transcript_id "g12.t1"; gene_id "g12";
NODE_399_length_121307_cov_32.084396	AUGUSTUS	intron	118652	118758	1	-	.	transcript_id "g12.t1"; gene_id "g12";
NODE_399_length_121307_cov_32.084396	AUGUSTUS	CDS	116732	116982	0.93	-	2	transcript_id "g12.t1"; gene_id "g12";
NODE_399_length_121307_cov_32.084396	AUGUSTUS	CDS	118118	118408	0.43	-	2	transcript_id "g12.t1"; gene_id "g12";
NODE_399_length_121307_cov_32.084396	AUGUSTUS	CDS	118468	118651	0.86	-	0	transcript_id "g12.t1"; gene_id "g12";
NODE_399_length_121307_cov_32.084396	AUGUSTUS	CDS	118759	118776	1	-	0	transcript_id "g12.t1"; gene_id "g12";
NODE_399_length_121307_cov_32.084396	AUGUSTUS	start_codon	118774	118776	.	-	0	transcript_id "g12.t1"; gene_id "g12";
NODE_577_length_16632_cov_29.137566	AUGUSTUS	gene	982	16716	0.06	+	.	g13
NODE_577_length_16632_cov_29.137566	AUGUSTUS	transcript	982	16716	0.06	+	.	g13.t1
NODE_577_length_16632_cov_29.137566	AUGUSTUS	start_codon	982	984	.	+	0	transcript_id "g13.t1"; gene_id "g13";
NODE_577_length_16632_cov_29.137566	AUGUSTUS	intron	1013	5349	0.35	+	.	transcript_id "g13.t1"; gene_id "g13";
NODE_577_length_16632_cov_29.137566	AUGUSTUS	intron	5469	11329	0.54	+	.	transcript_id "g13.t1"; gene_id "g13";
NODE_577_length_16632_cov_29.137566	AUGUSTUS	intron	11472	11981	1	+	.	transcript_id "g13.t1"; gene_id "g13";
NODE_577_length_16632_cov_29.137566	AUGUSTUS	intron	12169	14493	1	+	.	transcript_id "g13.t1"; gene_id "g13";
NODE_577_length_16632_cov_29.137566	AUGUSTUS	intron	14640	16716	0.57	+	.	transcript_id "g13.t1"; gene_id "g13";
NODE_577_length_16632_cov_29.137566	AUGUSTUS	CDS	982	1012	0.32	+	0	transcript_id "g13.t1"; gene_id "g13";
NODE_577_length_16632_cov_29.137566	AUGUSTUS	CDS	5350	5468	0.83	+	2	transcript_id "g13.t1"; gene_id "g13";
NODE_577_length_16632_cov_29.137566	AUGUSTUS	CDS	11330	11471	1	+	0	transcript_id "g13.t1"; gene_id "g13";
NODE_577_length_16632_cov_29.137566	AUGUSTUS	CDS	11982	12168	1	+	2	transcript_id "g13.t1"; gene_id "g13";
NODE_577_length_16632_cov_29.137566	AUGUSTUS	CDS	14494	14639	1	+	1	transcript_id "g13.t1"; gene_id "g13";
NODE_626_length_3307_cov_30.063501	AUGUSTUS	gene	1528	3093	0.37	+	.	g14
NODE_626_length_3307_cov_30.063501	AUGUSTUS	transcript	1528	3093	0.37	+	.	g14.t1
NODE_626_length_3307_cov_30.063501	AUGUSTUS	start_codon	1528	1530	.	+	0	transcript_id "g14.t1"; gene_id "g14";
NODE_626_length_3307_cov_30.063501	AUGUSTUS	intron	1958	2577	0.44	+	.	transcript_id "g14.t1"; gene_id "g14";
NODE_626_length_3307_cov_30.063501	AUGUSTUS	intron	2643	2733	0.99	+	.	transcript_id "g14.t1"; gene_id "g14";
NODE_626_length_3307_cov_30.063501	AUGUSTUS	CDS	1528	1957	0.52	+	0	transcript_id "g14.t1"; gene_id "g14";
NODE_626_length_3307_cov_30.063501	AUGUSTUS	CDS	2578	2642	0.66	+	2	transcript_id "g14.t1"; gene_id "g14";
NODE_626_length_3307_cov_30.063501	AUGUSTUS	CDS	2734	3093	0.95	+	0	transcript_id "g14.t1"; gene_id "g14";
NODE_626_length_3307_cov_30.063501	AUGUSTUS	stop_codon	3091	3093	.	+	0	transcript_id "g14.t1"; gene_id "g14";
NODE_656_length_261_cov_105.118774	AUGUSTUS	gene	1	310	0.89	-	.	g15
NODE_656_length_261_cov_105.118774	AUGUSTUS	transcript	1	310	0.89	-	.	g15.t1
NODE_656_length_261_cov_105.118774	AUGUSTUS	intron	1	130	0.98	-	.	transcript_id "g15.t1"; gene_id "g15";
NODE_656_length_261_cov_105.118774	AUGUSTUS	CDS	131	310	0.89	-	0	transcript_id "g15.t1"; gene_id "g15";
NODE_656_length_261_cov_105.118774	AUGUSTUS	start_codon	308	310	.	-	0	transcript_id "g15.t1"; gene_id "g15";
NODE_747_length_8014_cov_35.062889	AUGUSTUS	gene	2912	6814	0.58	-	.	g16
NODE_747_length_8014_cov_35.062889	AUGUSTUS	transcript	2912	6814	0.58	-	.	g16.t1
NODE_747_length_8014_cov_35.062889	AUGUSTUS	stop_codon	2912	2914	.	-	0	transcript_id "g16.t1"; gene_id "g16";
NODE_747_length_8014_cov_35.062889	AUGUSTUS	intron	5979	6072	0.85	-	.	transcript_id "g16.t1"; gene_id "g16";
NODE_747_length_8014_cov_35.062889	AUGUSTUS	intron	6468	6571	0.98	-	.	transcript_id "g16.t1"; gene_id "g16";
NODE_747_length_8014_cov_35.062889	AUGUSTUS	CDS	2912	5978	0.78	-	1	transcript_id "g16.t1"; gene_id "g16";
NODE_747_length_8014_cov_35.062889	AUGUSTUS	CDS	6073	6467	0.97	-	0	transcript_id "g16.t1"; gene_id "g16";
NODE_747_length_8014_cov_35.062889	AUGUSTUS	CDS	6572	6814	0.75	-	0	transcript_id "g16.t1"; gene_id "g16";
NODE_747_length_8014_cov_35.062889	AUGUSTUS	start_codon	6812	6814	.	-	0	transcript_id "g16.t1"; gene_id "g16";
NODE_873_length_150554_cov_27.992168	AUGUSTUS	gene	260	1472	0.43	+	.	g17
NODE_873_length_150554_cov_27.992168	AUGUSTUS	transcript	260	1472	0.43	+	.	g17.t1
NODE_873_length_150554_cov_27.992168	AUGUSTUS	start_codon	260	262	.	+	0	transcript_id "g17.t1"; gene_id "g17";
NODE_873_length_150554_cov_27.992168	AUGUSTUS	intron	286	874	0.57	+	.	transcript_id "g17.t1"; gene_id "g17";
NODE_873_length_150554_cov_27.992168	AUGUSTUS	CDS	260	285	0.57	+	0	transcript_id "g17.t1"; gene_id "g17";
NODE_873_length_150554_cov_27.992168	AUGUSTUS	CDS	875	1472	0.66	+	1	transcript_id "g17.t1"; gene_id "g17";
NODE_873_length_150554_cov_27.992168	AUGUSTUS	stop_codon	1470	1472	.	+	0	transcript_id "g17.t1"; gene_id "g17";
NODE_873_length_150554_cov_27.992168	AUGUSTUS	gene	34045	35457	0.32	-	.	g18
NODE_873_length_150554_cov_27.992168	AUGUSTUS	transcript	34045	35457	0.32	-	.	g18.t1
NODE_873_length_150554_cov_27.992168	AUGUSTUS	stop_codon	34045	34047	.	-	0	transcript_id "g18.t1"; gene_id "g18";
NODE_873_length_150554_cov_27.992168	AUGUSTUS	intron	34330	34397	0.96	-	.	transcript_id "g18.t1"; gene_id "g18";
NODE_873_length_150554_cov_27.992168	AUGUSTUS	intron	34581	34643	0.95	-	.	transcript_id "g18.t1"; gene_id "g18";
NODE_873_length_150554_cov_27.992168	AUGUSTUS	intron	35157	35229	0.95	-	.	transcript_id "g18.t1"; gene_id "g18";
NODE_873_length_150554_cov_27.992168	AUGUSTUS	CDS	34045	34329	0.68	-	0	transcript_id "g18.t1"; gene_id "g18";
NODE_873_length_150554_cov_27.992168	AUGUSTUS	CDS	34398	34580	0.95	-	0	transcript_id "g18.t1"; gene_id "g18";
NODE_873_length_150554_cov_27.992168	AUGUSTUS	CDS	34644	35156	0.94	-	0	transcript_id "g18.t1"; gene_id "g18";
NODE_873_length_150554_cov_27.992168	AUGUSTUS	CDS	35230	35457	0.48	-	0	transcript_id "g18.t1"; gene_id "g18";
NODE_873_length_150554_cov_27.992168	AUGUSTUS	start_codon	35455	35457	.	-	0	transcript_id "g18.t1"; gene_id "g18";
NODE_873_length_150554_cov_27.992168	AUGUSTUS	gene	50754	54088	0.74	+	.	g19
NODE_873_length_150554_cov_27.992168	AUGUSTUS	transcript	50754	54088	0.74	+	.	g19.t1
NODE_873_length_150554_cov_27.992168	AUGUSTUS	start_codon	50754	50756	.	+	0	transcript_id "g19.t1"; gene_id "g19";
NODE_873_length_150554_cov_27.992168	AUGUSTUS	intron	51100	52271	0.79	+	.	transcript_id "g19.t1"; gene_id "g19";
NODE_873_length_150554_cov_27.992168	AUGUSTUS	intron	52454	52595	1	+	.	transcript_id "g19.t1"; gene_id "g19";
NODE_873_length_150554_cov_27.992168	AUGUSTUS	intron	52727	52854	1	+	.	transcript_id "g19.t1"; gene_id "g19";
NODE_873_length_150554_cov_27.992168	AUGUSTUS	intron	53386	53478	1	+	.	transcript_id "g19.t1"; gene_id "g19";
NODE_873_length_150554_cov_27.992168	AUGUSTUS	CDS	50754	51099	0.94	+	0	transcript_id "g19.t1"; gene_id "g19";
NODE_873_length_150554_cov_27.992168	AUGUSTUS	CDS	52272	52453	0.79	+	2	transcript_id "g19.t1"; gene_id "g19";
NODE_873_length_150554_cov_27.992168	AUGUSTUS	CDS	52596	52726	1	+	0	transcript_id "g19.t1"; gene_id "g19";
NODE_873_length_150554_cov_27.992168	AUGUSTUS	CDS	52855	53385	1	+	1	transcript_id "g19.t1"; gene_id "g19";
NODE_873_length_150554_cov_27.992168	AUGUSTUS	CDS	53479	54088	1	+	1	transcript_id "g19.t1"; gene_id "g19";
NODE_873_length_150554_cov_27.992168	AUGUSTUS	stop_codon	54086	54088	.	+	0	transcript_id "g19.t1"; gene_id "g19";
NODE_873_length_150554_cov_27.992168	AUGUSTUS	gene	111390	150638	0.46	-	.	g20
NODE_873_length_150554_cov_27.992168	AUGUSTUS	transcript	111390	150638	0.46	-	.	g20.t1
NODE_873_length_150554_cov_27.992168	AUGUSTUS	stop_codon	111390	111392	.	-	0	transcript_id "g20.t1"; gene_id "g20";
NODE_873_length_150554_cov_27.992168	AUGUSTUS	intron	111940	116787	0.96	-	.	transcript_id "g20.t1"; gene_id "g20";
NODE_873_length_150554_cov_27.992168	AUGUSTUS	intron	117033	124919	0.96	-	.	transcript_id "g20.t1"; gene_id "g20";
NODE_873_length_150554_cov_27.992168	AUGUSTUS	intron	125206	145613	0.95	-	.	transcript_id "g20.t1"; gene_id "g20";
NODE_873_length_150554_cov_27.992168	AUGUSTUS	intron	145745	145846	1	-	.	transcript_id "g20.t1"; gene_id "g20";
NODE_873_length_150554_cov_27.992168	AUGUSTUS	intron	146056	150638	0.52	-	.	transcript_id "g20.t1"; gene_id "g20";
NODE_873_length_150554_cov_27.992168	AUGUSTUS	CDS	111390	111939	1	-	1	transcript_id "g20.t1"; gene_id "g20";
NODE_873_length_150554_cov_27.992168	AUGUSTUS	CDS	116788	117032	1	-	0	transcript_id "g20.t1"; gene_id "g20";
NODE_873_length_150554_cov_27.992168	AUGUSTUS	CDS	124920	125205	0.96	-	1	transcript_id "g20.t1"; gene_id "g20";
NODE_873_length_150554_cov_27.992168	AUGUSTUS	CDS	145614	145744	0.99	-	0	transcript_id "g20.t1"; gene_id "g20";
NODE_873_length_150554_cov_27.992168	AUGUSTUS	CDS	145847	146055	1	-	2	transcript_id "g20.t1"; gene_id "g20";
NODE_889_length_94_cov_975.127686	AUGUSTUS	gene	1	152	0.48	-	.	g21
NODE_889_length_94_cov_975.127686	AUGUSTUS	transcript	1	152	0.48	-	.	g21.t1
NODE_889_length_94_cov_975.127686	AUGUSTUS	CDS	1	152	0.48	-	0	transcript_id "g21.t1"; gene_id "g21";
NODE_889_length_94_cov_975.127686	AUGUSTUS	start_codon	150	152	.	-	0	transcript_id "g21.t1"; gene_id "g21";
NODE_940_length_271_cov_180.977859	AUGUSTUS	gene	1	251	0.79	-	.	g22
NODE_940_length_271_cov_180.977859	AUGUSTUS	transcript	1	251	0.79	-	.	g22.t1
NODE_940_length_271_cov_180.977859	AUGUSTUS	intron	1	71	0.99	-	.	transcript_id "g22.t1"; gene_id "g22";
NODE_940_length_271_cov_180.977859	AUGUSTUS	CDS	72	251	0.79	-	0	transcript_id "g22.t1"; gene_id "g22";
NODE_940_length_271_cov_180.977859	AUGUSTUS	start_codon	249	251	.	-	0	transcript_id "g22.t1"; gene_id "g22";
NODE_1004_length_582_cov_1838.101318	AUGUSTUS	gene	52	431	0.81	+	.	g23
NODE_1004_length_582_cov_1838.101318	AUGUSTUS	transcript	52	431	0.81	+	.	g23.t1
NODE_1004_length_582_cov_1838.101318	AUGUSTUS	start_codon	52	54	.	+	0	transcript_id "g23.t1"; gene_id "g23";
NODE_1004_length_582_cov_1838.101318	AUGUSTUS	intron	376	428	0.81	+	.	transcript_id "g23.t1"; gene_id "g23";
NODE_1004_length_582_cov_1838.101318	AUGUSTUS	CDS	52	375	0.83	+	0	transcript_id "g23.t1"; gene_id "g23";
NODE_1004_length_582_cov_1838.101318	AUGUSTUS	CDS	429	431	0.81	+	0	transcript_id "g23.t1"; gene_id "g23";
NODE_1004_length_582_cov_1838.101318	AUGUSTUS	stop_codon	429	431	.	+	0	transcript_id "g23.t1"; gene_id "g23";
NODE_1043_length_1221_cov_588.602783	AUGUSTUS	gene	66	1205	0.33	-	.	g24
NODE_1043_length_1221_cov_588.602783	AUGUSTUS	transcript	66	1205	0.33	-	.	g24.t1
NODE_1043_length_1221_cov_588.602783	AUGUSTUS	stop_codon	66	68	.	-	0	transcript_id "g24.t1"; gene_id "g24";
NODE_1043_length_1221_cov_588.602783	AUGUSTUS	CDS	66	1205	0.33	-	0	transcript_id "g24.t1"; gene_id "g24";
NODE_1043_length_1221_cov_588.602783	AUGUSTUS	start_codon	1203	1205	.	-	0	transcript_id "g24.t1"; gene_id "g24";
NODE_1084_length_84445_cov_28.302233	AUGUSTUS	gene	33343	36226	0.21	-	.	g25
NODE_1084_length_84445_cov_28.302233	AUGUSTUS	transcript	33343	36226	0.21	-	.	g25.t1
NODE_1084_length_84445_cov_28.302233	AUGUSTUS	stop_codon	33343	33345	.	-	0	transcript_id "g25.t1"; gene_id "g25";
NODE_1084_length_84445_cov_28.302233	AUGUSTUS	intron	33775	35926	0.32	-	.	transcript_id "g25.t1"; gene_id "g25";
NODE_1084_length_84445_cov_28.302233	AUGUSTUS	CDS	33343	33774	1	-	0	transcript_id "g25.t1"; gene_id "g25";
NODE_1084_length_84445_cov_28.302233	AUGUSTUS	CDS	35927	36226	0.21	-	0	transcript_id "g25.t1"; gene_id "g25";
NODE_1084_length_84445_cov_28.302233	AUGUSTUS	start_codon	36224	36226	.	-	0	transcript_id "g25.t1"; gene_id "g25";
NODE_1084_length_84445_cov_28.302233	AUGUSTUS	gene	66466	78306	0.19	-	.	g26
NODE_1084_length_84445_cov_28.302233	AUGUSTUS	transcript	66466	78306	0.19	-	.	g26.t1
NODE_1084_length_84445_cov_28.302233	AUGUSTUS	stop_codon	66466	66468	.	-	0	transcript_id "g26.t1"; gene_id "g26";
NODE_1084_length_84445_cov_28.302233	AUGUSTUS	intron	66898	69377	0.53	-	.	transcript_id "g26.t1"; gene_id "g26";
NODE_1084_length_84445_cov_28.302233	AUGUSTUS	intron	69510	77759	0.37	-	.	transcript_id "g26.t1"; gene_id "g26";
NODE_1084_length_84445_cov_28.302233	AUGUSTUS	intron	77841	78231	0.61	-	.	transcript_id "g26.t1"; gene_id "g26";
NODE_1084_length_84445_cov_28.302233	AUGUSTUS	CDS	66466	66897	0.96	-	0	transcript_id "g26.t1"; gene_id "g26";
NODE_1084_length_84445_cov_28.302233	AUGUSTUS	CDS	69378	69509	0.52	-	0	transcript_id "g26.t1"; gene_id "g26";
NODE_1084_length_84445_cov_28.302233	AUGUSTUS	CDS	77760	77840	0.61	-	0	transcript_id "g26.t1"; gene_id "g26";
NODE_1084_length_84445_cov_28.302233	AUGUSTUS	CDS	78232	78306	0.52	-	0	transcript_id "g26.t1"; gene_id "g26";
NODE_1084_length_84445_cov_28.302233	AUGUSTUS	start_codon	78304	78306	.	-	0	transcript_id "g26.t1"; gene_id "g26";
NODE_1099_length_27891_cov_35.309635	AUGUSTUS	gene	3027	12163	0.59	+	.	g27
NODE_1099_length_27891_cov_35.309635	AUGUSTUS	transcript	3027	12163	0.59	+	.	g27.t1
NODE_1099_length_27891_cov_35.309635	AUGUSTUS	start_codon	3027	3029	.	+	0	transcript_id "g27.t1"; gene_id "g27";
NODE_1099_length_27891_cov_35.309635	AUGUSTUS	intron	6210	10655	0.74	+	.	transcript_id "g27.t1"; gene_id "g27";
NODE_1099_length_27891_cov_35.309635	AUGUSTUS	intron	10872	11732	1	+	.	transcript_id "g27.t1"; gene_id "g27";
NODE_1099_length_27891_cov_35.309635	AUGUSTUS	intron	11967	12079	0.99	+	.	transcript_id "g27.t1"; gene_id "g27";
NODE_1099_length_27891_cov_35.309635	AUGUSTUS	CDS	3027	6209	0.81	+	0	transcript_id "g27.t1"; gene_id "g27";
NODE_1099_length_27891_cov_35.309635	AUGUSTUS	CDS	10656	10871	1	+	0	transcript_id "g27.t1"; gene_id "g27";
NODE_1099_length_27891_cov_35.309635	AUGUSTUS	CDS	11733	11966	0.99	+	0	transcript_id "g27.t1"; gene_id "g27";
NODE_1099_length_27891_cov_35.309635	AUGUSTUS	CDS	12080	12163	1	+	0	transcript_id "g27.t1"; gene_id "g27";
NODE_1099_length_27891_cov_35.309635	AUGUSTUS	stop_codon	12161	12163	.	+	0	transcript_id "g27.t1"; gene_id "g27";
NODE_1099_length_27891_cov_35.309635	AUGUSTUS	gene	12892	16161	0.27	-	.	g28
NODE_1099_length_27891_cov_35.309635	AUGUSTUS	transcript	12892	16161	0.27	-	.	g28.t1
NODE_1099_length_27891_cov_35.309635	AUGUSTUS	stop_codon	12892	12894	.	-	0	transcript_id "g28.t1"; gene_id "g28";
NODE_1099_length_27891_cov_35.309635	AUGUSTUS	intron	13051	14429	0.41	-	.	transcript_id "g28.t1"; gene_id "g28";
NODE_1099_length_27891_cov_35.309635	AUGUSTUS	intron	14996	15323	0.66	-	.	transcript_id "g28.t1"; gene_id "g28";
NODE_1099_length_27891_cov_35.309635	AUGUSTUS	CDS	12892	13050	0.51	-	0	transcript_id "g28.t1"; gene_id "g28";
NODE_1099_length_27891_cov_35.309635	AUGUSTUS	CDS	14430	14995	0.66	-	2	transcript_id "g28.t1"; gene_id "g28";
NODE_1099_length_27891_cov_35.309635	AUGUSTUS	CDS	15324	16161	0.64	-	0	transcript_id "g28.t1"; gene_id "g28";
NODE_1099_length_27891_cov_35.309635	AUGUSTUS	start_codon	16159	16161	.	-	0	transcript_id "g28.t1"; gene_id "g28";
NODE_1099_length_27891_cov_35.309635	AUGUSTUS	gene	20376	21584	0.76	+	.	g29
NODE_1099_length_27891_cov_35.309635	AUGUSTUS	transcript	20376	21584	0.76	+	.	g29.t1
NODE_1099_length_27891_cov_35.309635	AUGUSTUS	start_codon	20376	20378	.	+	0	transcript_id "g29.t1"; gene_id "g29";
NODE_1099_length_27891_cov_35.309635	AUGUSTUS	CDS	20376	21584	0.76	+	0	transcript_id "g29.t1"; gene_id "g29";
NODE_1099_length_27891_cov_35.309635	AUGUSTUS	stop_codon	21582	21584	.	+	0	transcript_id "g29.t1"; gene_id "g29";
NODE_1099_length_27891_cov_35.309635	AUGUSTUS	gene	22200	23319	0.73	-	.	g30
NODE_1099_length_27891_cov_35.309635	AUGUSTUS	transcript	22200	23319	0.73	-	.	g30.t1
NODE_1099_length_27891_cov_35.309635	AUGUSTUS	stop_codon	22200	22202	.	-	0	transcript_id "g30.t1"; gene_id "g30";
NODE_1099_length_27891_cov_35.309635	AUGUSTUS	intron	22625	22712	0.87	-	.	transcript_id "g30.t1"; gene_id "g30";
NODE_1099_length_27891_cov_35.309635	AUGUSTUS	CDS	22200	22624	0.78	-	2	transcript_id "g30.t1"; gene_id "g30";
NODE_1099_length_27891_cov_35.309635	AUGUSTUS	CDS	22713	23319	0.93	-	0	transcript_id "g30.t1"; gene_id "g30";
NODE_1099_length_27891_cov_35.309635	AUGUSTUS	start_codon	23317	23319	.	-	0	transcript_id "g30.t1"; gene_id "g30";
NODE_1099_length_27891_cov_35.309635	AUGUSTUS	gene	26399	27274	0.82	-	.	g31
NODE_1099_length_27891_cov_35.309635	AUGUSTUS	transcript	26399	27274	0.82	-	.	g31.t1
NODE_1099_length_27891_cov_35.309635	AUGUSTUS	stop_codon	26399	26401	.	-	0	transcript_id "g31.t1"; gene_id "g31";
NODE_1099_length_27891_cov_35.309635	AUGUSTUS	intron	26548	26632	1	-	.	transcript_id "g31.t1"; gene_id "g31";
NODE_1099_length_27891_cov_35.309635	AUGUSTUS	intron	27056	27156	0.85	-	.	transcript_id "g31.t1"; gene_id "g31";
NODE_1099_length_27891_cov_35.309635	AUGUSTUS	CDS	26399	26547	0.98	-	2	transcript_id "g31.t1"; gene_id "g31";
NODE_1099_length_27891_cov_35.309635	AUGUSTUS	CDS	26633	27055	0.86	-	2	transcript_id "g31.t1"; gene_id "g31";
NODE_1099_length_27891_cov_35.309635	AUGUSTUS	CDS	27157	27274	0.86	-	0	transcript_id "g31.t1"; gene_id "g31";
NODE_1099_length_27891_cov_35.309635	AUGUSTUS	start_codon	27272	27274	.	-	0	transcript_id "g31.t1"; gene_id "g31";
NODE_1417_length_5776_cov_18.811808	AUGUSTUS	gene	1	370	1	+	.	g32
NODE_1417_length_5776_cov_18.811808	AUGUSTUS	transcript	1	370	1	+	.	g32.t1
NODE_1417_length_5776_cov_18.811808	AUGUSTUS	CDS	1	370	1	+	1	transcript_id "g32.t1"; gene_id "g32";
NODE_1417_length_5776_cov_18.811808	AUGUSTUS	stop_codon	368	370	.	+	0	transcript_id "g32.t1"; gene_id "g32";
NODE_1417_length_5776_cov_18.811808	AUGUSTUS	gene	789	3419	0.78	-	.	g33
NODE_1417_length_5776_cov_18.811808	AUGUSTUS	transcript	789	3419	0.78	-	.	g33.t1
NODE_1417_length_5776_cov_18.811808	AUGUSTUS	stop_codon	789	791	.	-	0	transcript_id "g33.t1"; gene_id "g33";
NODE_1417_length_5776_cov_18.811808	AUGUSTUS	intron	812	879	1	-	.	transcript_id "g33.t1"; gene_id "g33";
NODE_1417_length_5776_cov_18.811808	AUGUSTUS	intron	973	1694	0.92	-	.	transcript_id "g33.t1"; gene_id "g33";
NODE_1417_length_5776_cov_18.811808	AUGUSTUS	intron	2667	2734	1	-	.	transcript_id "g33.t1"; gene_id "g33";
NODE_1417_length_5776_cov_18.811808	AUGUSTUS	intron	2871	3014	0.85	-	.	transcript_id "g33.t1"; gene_id "g33";
NODE_1417_length_5776_cov_18.811808	AUGUSTUS	CDS	789	811	1	-	2	transcript_id "g33.t1"; gene_id "g33";
NODE_1417_length_5776_cov_18.811808	AUGUSTUS	CDS	880	972	1	-	2	transcript_id "g33.t1"; gene_id "g33";
NODE_1417_length_5776_cov_18.811808	AUGUSTUS	CDS	1695	2666	0.91	-	2	transcript_id "g33.t1"; gene_id "g33";
NODE_1417_length_5776_cov_18.811808	AUGUSTUS	CDS	2735	2870	1	-	0	transcript_id "g33.t1"; gene_id "g33";
NODE_1417_length_5776_cov_18.811808	AUGUSTUS	CDS	3015	3419	0.85	-	0	transcript_id "g33.t1"; gene_id "g33";
NODE_1417_length_5776_cov_18.811808	AUGUSTUS	start_codon	3417	3419	.	-	0	transcript_id "g33.t1"; gene_id "g33";
NODE_1417_length_5776_cov_18.811808	AUGUSTUS	gene	4059	5860	1	+	.	g34
NODE_1417_length_5776_cov_18.811808	AUGUSTUS	transcript	4059	5860	1	+	.	g34.t1
NODE_1417_length_5776_cov_18.811808	AUGUSTUS	start_codon	4059	4061	.	+	0	transcript_id "g34.t1"; gene_id "g34";
NODE_1417_length_5776_cov_18.811808	AUGUSTUS	intron	4152	4215	1	+	.	transcript_id "g34.t1"; gene_id "g34";
NODE_1417_length_5776_cov_18.811808	AUGUSTUS	intron	5716	5782	1	+	.	transcript_id "g34.t1"; gene_id "g34";
NODE_1417_length_5776_cov_18.811808	AUGUSTUS	CDS	4059	4151	1	+	0	transcript_id "g34.t1"; gene_id "g34";
NODE_1417_length_5776_cov_18.811808	AUGUSTUS	CDS	4216	5715	1	+	0	transcript_id "g34.t1"; gene_id "g34";
NODE_1417_length_5776_cov_18.811808	AUGUSTUS	CDS	5783	5860	1	+	0	transcript_id "g34.t1"; gene_id "g34";
NODE_1423_length_130_cov_1535.684570	AUGUSTUS	gene	1	188	0.53	-	.	g35
NODE_1423_length_130_cov_1535.684570	AUGUSTUS	transcript	1	188	0.53	-	.	g35.t1
NODE_1423_length_130_cov_1535.684570	AUGUSTUS	CDS	1	188	0.53	-	0	transcript_id "g35.t1"; gene_id "g35";
NODE_1423_length_130_cov_1535.684570	AUGUSTUS	start_codon	186	188	.	-	0	transcript_id "g35.t1"; gene_id "g35";
NODE_1430_length_52425_cov_31.681469	AUGUSTUS	gene	107	5081	0.32	-	.	g36
NODE_1430_length_52425_cov_31.681469	AUGUSTUS	transcript	107	5081	0.32	-	.	g36.t1
NODE_1430_length_52425_cov_31.681469	AUGUSTUS	stop_codon	107	109	.	-	0	transcript_id "g36.t1"; gene_id "g36";
NODE_1430_length_52425_cov_31.681469	AUGUSTUS	intron	237	358	1	-	.	transcript_id "g36.t1"; gene_id "g36";
NODE_1430_length_52425_cov_31.681469	AUGUSTUS	intron	451	536	0.98	-	.	transcript_id "g36.t1"; gene_id "g36";
NODE_1430_length_52425_cov_31.681469	AUGUSTUS	intron	1298	1488	1	-	.	transcript_id "g36.t1"; gene_id "g36";
NODE_1430_length_52425_cov_31.681469	AUGUSTUS	intron	2969	3116	1	-	.	transcript_id "g36.t1"; gene_id "g36";
NODE_1430_length_52425_cov_31.681469	AUGUSTUS	intron	4433	4502	0.63	-	.	transcript_id "g36.t1"; gene_id "g36";
NODE_1430_length_52425_cov_31.681469	AUGUSTUS	intron	4632	4912	0.65	-	.	transcript_id "g36.t1"; gene_id "g36";
NODE_1430_length_52425_cov_31.681469	AUGUSTUS	CDS	107	236	0.99	-	1	transcript_id "g36.t1"; gene_id "g36";
NODE_1430_length_52425_cov_31.681469	AUGUSTUS	CDS	359	450	1	-	0	transcript_id "g36.t1"; gene_id "g36";
NODE_1430_length_52425_cov_31.681469	AUGUSTUS	CDS	537	1297	0.98	-	2	transcript_id "g36.t1"; gene_id "g36";
NODE_1430_length_52425_cov_31.681469	AUGUSTUS	CDS	1489	2968	1	-	0	transcript_id "g36.t1"; gene_id "g36";
NODE_1430_length_52425_cov_31.681469	AUGUSTUS	CDS	3117	4432	0.94	-	2	transcript_id "g36.t1"; gene_id "g36";
NODE_1430_length_52425_cov_31.681469	AUGUSTUS	CDS	4503	4631	0.65	-	2	transcript_id "g36.t1"; gene_id "g36";
NODE_1430_length_52425_cov_31.681469	AUGUSTUS	CDS	4913	5081	0.46	-	0	transcript_id "g36.t1"; gene_id "g36";
NODE_1430_length_52425_cov_31.681469	AUGUSTUS	start_codon	5079	5081	.	-	0	transcript_id "g36.t1"; gene_id "g36";
NODE_1430_length_52425_cov_31.681469	AUGUSTUS	gene	9431	13220	0.69	+	.	g37
NODE_1430_length_52425_cov_31.681469	AUGUSTUS	transcript	9431	13220	0.69	+	.	g37.t1
NODE_1430_length_52425_cov_31.681469	AUGUSTUS	start_codon	9431	9433	.	+	0	transcript_id "g37.t1"; gene_id "g37";
NODE_1430_length_52425_cov_31.681469	AUGUSTUS	intron	9520	11431	1	+	.	transcript_id "g37.t1"; gene_id "g37";
NODE_1430_length_52425_cov_31.681469	AUGUSTUS	intron	11652	11729	0.84	+	.	transcript_id "g37.t1"; gene_id "g37";
NODE_1430_length_52425_cov_31.681469	AUGUSTUS	intron	11967	12037	1	+	.	transcript_id "g37.t1"; gene_id "g37";
NODE_1430_length_52425_cov_31.681469	AUGUSTUS	intron	12905	12986	0.89	+	.	transcript_id "g37.t1"; gene_id "g37";
NODE_1430_length_52425_cov_31.681469	AUGUSTUS	CDS	9431	9519	0.94	+	0	transcript_id "g37.t1"; gene_id "g37";
NODE_1430_length_52425_cov_31.681469	AUGUSTUS	CDS	11432	11651	1	+	1	transcript_id "g37.t1"; gene_id "g37";
NODE_1430_length_52425_cov_31.681469	AUGUSTUS	CDS	11730	11966	0.84	+	0	transcript_id "g37.t1"; gene_id "g37";
NODE_1430_length_52425_cov_31.681469	AUGUSTUS	CDS	12038	12904	0.89	+	0	transcript_id "g37.t1"; gene_id "g37";
NODE_1430_length_52425_cov_31.681469	AUGUSTUS	CDS	12987	13220	0.99	+	0	transcript_id "g37.t1"; gene_id "g37";
NODE_1430_length_52425_cov_31.681469	AUGUSTUS	stop_codon	13218	13220	.	+	0	transcript_id "g37.t1"; gene_id "g37";
NODE_1430_length_52425_cov_31.681469	AUGUSTUS	gene	23582	31364	0.27	-	.	g38
NODE_1430_length_52425_cov_31.681469	AUGUSTUS	transcript	23582	31364	0.27	-	.	g38.t1
NODE_1430_length_52425_cov_31.681469	AUGUSTUS	stop_codon	23582	23584	.	-	0	transcript_id "g38.t1"; gene_id "g38";
NODE_1430_length_52425_cov_31.681469	AUGUSTUS	intron	26733	31347	0.27	-	.	transcript_id "g38.t1"; gene_id "g38";
NODE_1430_length_52425_cov_31.681469	AUGUSTUS	CDS	23582	26732	0.34	-	1	transcript_id "g38.t1"; gene_id "g38";
NODE_1430_length_52425_cov_31.681469	AUGUSTUS	CDS	31348	31364	0.27	-	0	transcript_id "g38.t1"; gene_id "g38";
NODE_1430_length_52425_cov_31.681469	AUGUSTUS	start_codon	31362	31364	.	-	0	transcript_id "g38.t1"; gene_id "g38";
NODE_1431_length_48227_cov_30.083376	AUGUSTUS	gene	1	4742	0.91	+	.	g39
NODE_1431_length_48227_cov_30.083376	AUGUSTUS	transcript	1	4742	0.91	+	.	g39.t1
NODE_1431_length_48227_cov_30.083376	AUGUSTUS	intron	1	1851	0.91	+	.	transcript_id "g39.t1"; gene_id "g39";
NODE_1431_length_48227_cov_30.083376	AUGUSTUS	intron	1981	2085	1	+	.	transcript_id "g39.t1"; gene_id "g39";
NODE_1431_length_48227_cov_30.083376	AUGUSTUS	intron	2223	2293	1	+	.	transcript_id "g39.t1"; gene_id "g39";
NODE_1431_length_48227_cov_30.083376	AUGUSTUS	intron	2483	2566	1	+	.	transcript_id "g39.t1"; gene_id "g39";
NODE_1431_length_48227_cov_30.083376	AUGUSTUS	intron	2766	2858	1	+	.	transcript_id "g39.t1"; gene_id "g39";
NODE_1431_length_48227_cov_30.083376	AUGUSTUS	intron	2921	3033	1	+	.	transcript_id "g39.t1"; gene_id "g39";
NODE_1431_length_48227_cov_30.083376	AUGUSTUS	intron	3235	4497	1	+	.	transcript_id "g39.t1"; gene_id "g39";
NODE_1431_length_48227_cov_30.083376	AUGUSTUS	CDS	1852	1980	0.93	+	1	transcript_id "g39.t1"; gene_id "g39";
NODE_1431_length_48227_cov_30.083376	AUGUSTUS	CDS	2086	2222	1	+	1	transcript_id "g39.t1"; gene_id "g39";
NODE_1431_length_48227_cov_30.083376	AUGUSTUS	CDS	2294	2482	1	+	2	transcript_id "g39.t1"; gene_id "g39";
NODE_1431_length_48227_cov_30.083376	AUGUSTUS	CDS	2567	2765	1	+	2	transcript_id "g39.t1"; gene_id "g39";
NODE_1431_length_48227_cov_30.083376	AUGUSTUS	CDS	2859	2920	1	+	1	transcript_id "g39.t1"; gene_id "g39";
NODE_1431_length_48227_cov_30.083376	AUGUSTUS	CDS	3034	3234	1	+	2	transcript_id "g39.t1"; gene_id "g39";
NODE_1431_length_48227_cov_30.083376	AUGUSTUS	CDS	4498	4742	1	+	2	transcript_id "g39.t1"; gene_id "g39";
NODE_1431_length_48227_cov_30.083376	AUGUSTUS	stop_codon	4740	4742	.	+	0	transcript_id "g39.t1"; gene_id "g39";
NODE_1431_length_48227_cov_30.083376	AUGUSTUS	gene	13412	24454	0.41	-	.	g40
NODE_1431_length_48227_cov_30.083376	AUGUSTUS	transcript	13412	24454	0.41	-	.	g40.t1
NODE_1431_length_48227_cov_30.083376	AUGUSTUS	stop_codon	13412	13414	.	-	0	transcript_id "g40.t1"; gene_id "g40";
NODE_1431_length_48227_cov_30.083376	AUGUSTUS	intron	13546	13612	1	-	.	transcript_id "g40.t1"; gene_id "g40";
NODE_1431_length_48227_cov_30.083376	AUGUSTUS	intron	13872	13948	1	-	.	transcript_id "g40.t1"; gene_id "g40";
NODE_1431_length_48227_cov_30.083376	AUGUSTUS	intron	14072	14151	1	-	.	transcript_id "g40.t1"; gene_id "g40";
NODE_1431_length_48227_cov_30.083376	AUGUSTUS	intron	15563	16313	1	-	.	transcript_id "g40.t1"; gene_id "g40";
NODE_1431_length_48227_cov_30.083376	AUGUSTUS	intron	17666	17753	1	-	.	transcript_id "g40.t1"; gene_id "g40";
NODE_1431_length_48227_cov_30.083376	AUGUSTUS	intron	17952	18019	1	-	.	transcript_id "g40.t1"; gene_id "g40";
NODE_1431_length_48227_cov_30.083376	AUGUSTUS	intron	19151	19224	1	-	.	transcript_id "g40.t1"; gene_id "g40";
NODE_1431_length_48227_cov_30.083376	AUGUSTUS	intron	19394	20015	0.98	-	.	transcript_id "g40.t1"; gene_id "g40";
NODE_1431_length_48227_cov_30.083376	AUGUSTUS	intron	20585	20661	1	-	.	transcript_id "g40.t1"; gene_id "g40";
NODE_1431_length_48227_cov_30.083376	AUGUSTUS	intron	21445	21512	0.99	-	.	transcript_id "g40.t1"; gene_id "g40";
NODE_1431_length_48227_cov_30.083376	AUGUSTUS	intron	22362	22751	0.55	-	.	transcript_id "g40.t1"; gene_id "g40";
NODE_1431_length_48227_cov_30.083376	AUGUSTUS	intron	22968	24004	0.62	-	.	transcript_id "g40.t1"; gene_id "g40";
NODE_1431_length_48227_cov_30.083376	AUGUSTUS	intron	24146	24259	0.99	-	.	transcript_id "g40.t1"; gene_id "g40";
NODE_1431_length_48227_cov_30.083376	AUGUSTUS	CDS	13412	13545	1	-	2	transcript_id "g40.t1"; gene_id "g40";
NODE_1431_length_48227_cov_30.083376	AUGUSTUS	CDS	13613	13871	1	-	0	transcript_id "g40.t1"; gene_id "g40";
NODE_1431_length_48227_cov_30.083376	AUGUSTUS	CDS	13949	14071	1	-	0	transcript_id "g40.t1"; gene_id "g40";
NODE_1431_length_48227_cov_30.083376	AUGUSTUS	CDS	14152	15562	1	-	1	transcript_id "g40.t1"; gene_id "g40";
NODE_1431_length_48227_cov_30.083376	AUGUSTUS	CDS	16314	17665	1	-	0	transcript_id "g40.t1"; gene_id "g40";
NODE_1431_length_48227_cov_30.083376	AUGUSTUS	CDS	17754	17951	1	-	0	transcript_id "g40.t1"; gene_id "g40";
NODE_1431_length_48227_cov_30.083376	AUGUSTUS	CDS	18020	19150	1	-	0	transcript_id "g40.t1"; gene_id "g40";
NODE_1431_length_48227_cov_30.083376	AUGUSTUS	CDS	19225	19393	0.98	-	1	transcript_id "g40.t1"; gene_id "g40";
NODE_1431_length_48227_cov_30.083376	AUGUSTUS	CDS	20016	20584	1	-	0	transcript_id "g40.t1"; gene_id "g40";
NODE_1431_length_48227_cov_30.083376	AUGUSTUS	CDS	20662	21444	1	-	0	transcript_id "g40.t1"; gene_id "g40";
NODE_1431_length_48227_cov_30.083376	AUGUSTUS	CDS	21513	22361	0.99	-	0	transcript_id "g40.t1"; gene_id "g40";
NODE_1431_length_48227_cov_30.083376	AUGUSTUS	CDS	22752	22967	0.55	-	0	transcript_id "g40.t1"; gene_id "g40";
NODE_1431_length_48227_cov_30.083376	AUGUSTUS	CDS	24005	24145	1	-	0	transcript_id "g40.t1"; gene_id "g40";
NODE_1431_length_48227_cov_30.083376	AUGUSTUS	CDS	24260	24454	0.68	-	0	transcript_id "g40.t1"; gene_id "g40";
NODE_1431_length_48227_cov_30.083376	AUGUSTUS	start_codon	24452	24454	.	-	0	transcript_id "g40.t1"; gene_id "g40";
NODE_1431_length_48227_cov_30.083376	AUGUSTUS	gene	26414	27343	0.98	+	.	g41
NODE_1431_length_48227_cov_30.083376	AUGUSTUS	transcript	26414	27343	0.98	+	.	g41.t1
NODE_1431_length_48227_cov_30.083376	AUGUSTUS	start_codon	26414	26416	.	+	0	transcript_id "g41.t1"; gene_id "g41";
NODE_1431_length_48227_cov_30.083376	AUGUSTUS	intron	27135	27194	1	+	.	transcript_id "g41.t1"; gene_id "g41";
NODE_1431_length_48227_cov_30.083376	AUGUSTUS	CDS	26414	27134	1	+	0	transcript_id "g41.t1"; gene_id "g41";
NODE_1431_length_48227_cov_30.083376	AUGUSTUS	CDS	27195	27343	0.98	+	2	transcript_id "g41.t1"; gene_id "g41";
NODE_1431_length_48227_cov_30.083376	AUGUSTUS	stop_codon	27341	27343	.	+	0	transcript_id "g41.t1"; gene_id "g41";
NODE_1431_length_48227_cov_30.083376	AUGUSTUS	gene	34152	36358	0.48	-	.	g42
NODE_1431_length_48227_cov_30.083376	AUGUSTUS	transcript	34152	36358	0.48	-	.	g42.t1
NODE_1431_length_48227_cov_30.083376	AUGUSTUS	stop_codon	34152	34154	.	-	0	transcript_id "g42.t1"; gene_id "g42";
NODE_1431_length_48227_cov_30.083376	AUGUSTUS	intron	34340	34501	1	-	.	transcript_id "g42.t1"; gene_id "g42";
NODE_1431_length_48227_cov_30.083376	AUGUSTUS	intron	34656	35448	0.98	-	.	transcript_id "g42.t1"; gene_id "g42";
NODE_1431_length_48227_cov_30.083376	AUGUSTUS	intron	35579	35658	1	-	.	transcript_id "g42.t1"; gene_id "g42";
NODE_1431_length_48227_cov_30.083376	AUGUSTUS	intron	35788	36236	0.49	-	.	transcript_id "g42.t1"; gene_id "g42";
NODE_1431_length_48227_cov_30.083376	AUGUSTUS	CDS	34152	34339	1	-	2	transcript_id "g42.t1"; gene_id "g42";
NODE_1431_length_48227_cov_30.083376	AUGUSTUS	CDS	34502	34655	0.98	-	0	transcript_id "g42.t1"; gene_id "g42";
NODE_1431_length_48227_cov_30.083376	AUGUSTUS	CDS	35449	35578	1	-	1	transcript_id "g42.t1"; gene_id "g42";
NODE_1431_length_48227_cov_30.083376	AUGUSTUS	CDS	35659	35787	1	-	1	transcript_id "g42.t1"; gene_id "g42";
NODE_1431_length_48227_cov_30.083376	AUGUSTUS	CDS	36237	36358	0.49	-	0	transcript_id "g42.t1"; gene_id "g42";
NODE_1431_length_48227_cov_30.083376	AUGUSTUS	start_codon	36356	36358	.	-	0	transcript_id "g42.t1"; gene_id "g42";
NODE_1431_length_48227_cov_30.083376	AUGUSTUS	gene	40844	47596	0.58	+	.	g43
NODE_1431_length_48227_cov_30.083376	AUGUSTUS	transcript	40844	47596	0.58	+	.	g43.t1
NODE_1431_length_48227_cov_30.083376	AUGUSTUS	start_codon	40844	40846	.	+	0	transcript_id "g43.t1"; gene_id "g43";
NODE_1431_length_48227_cov_30.083376	AUGUSTUS	intron	40992	47501	0.61	+	.	transcript_id "g43.t1"; gene_id "g43";
NODE_1431_length_48227_cov_30.083376	AUGUSTUS	CDS	40844	40991	0.71	+	0	transcript_id "g43.t1"; gene_id "g43";
NODE_1431_length_48227_cov_30.083376	AUGUSTUS	CDS	47502	47596	0.76	+	2	transcript_id "g43.t1"; gene_id "g43";
NODE_1431_length_48227_cov_30.083376	AUGUSTUS	stop_codon	47594	47596	.	+	0	transcript_id "g43.t1"; gene_id "g43";
NODE_1468_length_1268_cov_16.142744	AUGUSTUS	gene	1	197	0.81	-	.	g44
NODE_1468_length_1268_cov_16.142744	AUGUSTUS	transcript	1	197	0.81	-	.	g44.t1
NODE_1468_length_1268_cov_16.142744	AUGUSTUS	CDS	1	197	0.81	-	0	transcript_id "g44.t1"; gene_id "g44";
NODE_1468_length_1268_cov_16.142744	AUGUSTUS	start_codon	195	197	.	-	0	transcript_id "g44.t1"; gene_id "g44";
NODE_1470_length_146726_cov_34.080093	AUGUSTUS	gene	13141	29381	0.08	+	.	g45
NODE_1470_length_146726_cov_34.080093	AUGUSTUS	transcript	13141	29381	0.08	+	.	g45.t1
NODE_1470_length_146726_cov_34.080093	AUGUSTUS	start_codon	13141	13143	.	+	0	transcript_id "g45.t1"; gene_id "g45";
NODE_1470_length_146726_cov_34.080093	AUGUSTUS	intron	13244	23336	0.18	+	.	transcript_id "g45.t1"; gene_id "g45";
NODE_1470_length_146726_cov_34.080093	AUGUSTUS	intron	23491	29188	0.24	+	.	transcript_id "g45.t1"; gene_id "g45";
NODE_1470_length_146726_cov_34.080093	AUGUSTUS	CDS	13141	13243	0.37	+	0	transcript_id "g45.t1"; gene_id "g45";
NODE_1470_length_146726_cov_34.080093	AUGUSTUS	CDS	23337	23490	0.45	+	2	transcript_id "g45.t1"; gene_id "g45";
NODE_1470_length_146726_cov_34.080093	AUGUSTUS	CDS	29189	29381	0.26	+	1	transcript_id "g45.t1"; gene_id "g45";
NODE_1470_length_146726_cov_34.080093	AUGUSTUS	stop_codon	29379	29381	.	+	0	transcript_id "g45.t1"; gene_id "g45";
NODE_1470_length_146726_cov_34.080093	AUGUSTUS	gene	30888	60746	0.03	-	.	g46
NODE_1470_length_146726_cov_34.080093	AUGUSTUS	transcript	30888	60746	0.03	-	.	g46.t1
NODE_1470_length_146726_cov_34.080093	AUGUSTUS	stop_codon	30888	30890	.	-	0	transcript_id "g46.t1"; gene_id "g46";
NODE_1470_length_146726_cov_34.080093	AUGUSTUS	intron	30972	39000	0.37	-	.	transcript_id "g46.t1"; gene_id "g46";
NODE_1470_length_146726_cov_34.080093	AUGUSTUS	intron	39169	42626	0.41	-	.	transcript_id "g46.t1"; gene_id "g46";
NODE_1470_length_146726_cov_34.080093	AUGUSTUS	intron	42724	47081	0.43	-	.	transcript_id "g46.t1"; gene_id "g46";
NODE_1470_length_146726_cov_34.080093	AUGUSTUS	intron	48539	50046	0.99	-	.	transcript_id "g46.t1"; gene_id "g46";
NODE_1470_length_146726_cov_34.080093	AUGUSTUS	intron	50262	50468	0.67	-	.	transcript_id "g46.t1"; gene_id "g46";
NODE_1470_length_146726_cov_34.080093	AUGUSTUS	intron	50726	50850	1	-	.	transcript_id "g46.t1"; gene_id "g46";
NODE_1470_length_146726_cov_34.080093	AUGUSTUS	intron	50988	51080	0.94	-	.	transcript_id "g46.t1"; gene_id "g46";
NODE_1470_length_146726_cov_34.080093	AUGUSTUS	intron	51210	58131	0.86	-	.	transcript_id "g46.t1"; gene_id "g46";
NODE_1470_length_146726_cov_34.080093	AUGUSTUS	intron	59463	59530	0.99	-	.	transcript_id "g46.t1"; gene_id "g46";
NODE_1470_length_146726_cov_34.080093	AUGUSTUS	CDS	30888	30971	0.47	-	0	transcript_id "g46.t1"; gene_id "g46";
NODE_1470_length_146726_cov_34.080093	AUGUSTUS	CDS	39001	39168	0.72	-	0	transcript_id "g46.t1"; gene_id "g46";
NODE_1470_length_146726_cov_34.080093	AUGUSTUS	CDS	42627	42723	0.41	-	1	transcript_id "g46.t1"; gene_id "g46";
NODE_1470_length_146726_cov_34.080093	AUGUSTUS	CDS	47082	48538	0.47	-	0	transcript_id "g46.t1"; gene_id "g46";
NODE_1470_length_146726_cov_34.080093	AUGUSTUS	CDS	50047	50261	0.67	-	2	transcript_id "g46.t1"; gene_id "g46";
NODE_1470_length_146726_cov_34.080093	AUGUSTUS	CDS	50469	50725	1	-	1	transcript_id "g46.t1"; gene_id "g46";
NODE_1470_length_146726_cov_34.080093	AUGUSTUS	CDS	50851	50987	1	-	0	transcript_id "g46.t1"; gene_id "g46";
NODE_1470_length_146726_cov_34.080093	AUGUSTUS	CDS	51081	51209	0.81	-	0	transcript_id "g46.t1"; gene_id "g46";
NODE_1470_length_146726_cov_34.080093	AUGUSTUS	CDS	58132	59462	0.94	-	2	transcript_id "g46.t1"; gene_id "g46";
NODE_1470_length_146726_cov_34.080093	AUGUSTUS	CDS	59531	60746	0.28	-	0	transcript_id "g46.t1"; gene_id "g46";
NODE_1470_length_146726_cov_34.080093	AUGUSTUS	start_codon	60744	60746	.	-	0	transcript_id "g46.t1"; gene_id "g46";
NODE_1470_length_146726_cov_34.080093	AUGUSTUS	gene	62951	64322	0.75	+	.	g47
NODE_1470_length_146726_cov_34.080093	AUGUSTUS	transcript	62951	64322	0.75	+	.	g47.t1
NODE_1470_length_146726_cov_34.080093	AUGUSTUS	start_codon	62951	62953	.	+	0	transcript_id "g47.t1"; gene_id "g47";
NODE_1470_length_146726_cov_34.080093	AUGUSTUS	intron	63948	64035	0.99	+	.	transcript_id "g47.t1"; gene_id "g47";
NODE_1470_length_146726_cov_34.080093	AUGUSTUS	CDS	62951	63947	0.96	+	0	transcript_id "g47.t1"; gene_id "g47";
NODE_1470_length_146726_cov_34.080093	AUGUSTUS	CDS	64036	64322	0.78	+	2	transcript_id "g47.t1"; gene_id "g47";
NODE_1470_length_146726_cov_34.080093	AUGUSTUS	stop_codon	64320	64322	.	+	0	transcript_id "g47.t1"; gene_id "g47";
NODE_1470_length_146726_cov_34.080093	AUGUSTUS	gene	64680	67084	0.99	-	.	g48
NODE_1470_length_146726_cov_34.080093	AUGUSTUS	transcript	64680	67084	0.99	-	.	g48.t1
NODE_1470_length_146726_cov_34.080093	AUGUSTUS	stop_codon	64680	64682	.	-	0	transcript_id "g48.t1"; gene_id "g48";
NODE_1470_length_146726_cov_34.080093	AUGUSTUS	intron	66859	66935	0.99	-	.	transcript_id "g48.t1"; gene_id "g48";
NODE_1470_length_146726_cov_34.080093	AUGUSTUS	CDS	64680	66858	1	-	1	transcript_id "g48.t1"; gene_id "g48";
NODE_1470_length_146726_cov_34.080093	AUGUSTUS	CDS	66936	67084	0.99	-	0	transcript_id "g48.t1"; gene_id "g48";
NODE_1470_length_146726_cov_34.080093	AUGUSTUS	start_codon	67082	67084	.	-	0	transcript_id "g48.t1"; gene_id "g48";
NODE_1470_length_146726_cov_34.080093	AUGUSTUS	gene	67613	68290	0.86	+	.	g49
NODE_1470_length_146726_cov_34.080093	AUGUSTUS	transcript	67613	68290	0.86	+	.	g49.t1
NODE_1470_length_146726_cov_34.080093	AUGUSTUS	start_codon	67613	67615	.	+	0	transcript_id "g49.t1"; gene_id "g49";
NODE_1470_length_146726_cov_34.080093	AUGUSTUS	intron	67667	67789	0.88	+	.	transcript_id "g49.t1"; gene_id "g49";
NODE_1470_length_146726_cov_34.080093	AUGUSTUS	intron	67872	67976	1	+	.	transcript_id "g49.t1"; gene_id "g49";
NODE_1470_length_146726_cov_34.080093	AUGUSTUS	intron	68183	68248	1	+	.	transcript_id "g49.t1"; gene_id "g49";
NODE_1470_length_146726_cov_34.080093	AUGUSTUS	CDS	67613	67666	0.86	+	0	transcript_id "g49.t1"; gene_id "g49";
NODE_1470_length_146726_cov_34.080093	AUGUSTUS	CDS	67790	67871	0.88	+	0	transcript_id "g49.t1"; gene_id "g49";
NODE_1470_length_146726_cov_34.080093	AUGUSTUS	CDS	67977	68182	1	+	2	transcript_id "g49.t1"; gene_id "g49";
NODE_1470_length_146726_cov_34.080093	AUGUSTUS	CDS	68249	68290	1	+	0	transcript_id "g49.t1"; gene_id "g49";
NODE_1470_length_146726_cov_34.080093	AUGUSTUS	stop_codon	68288	68290	.	+	0	transcript_id "g49.t1"; gene_id "g49";
NODE_1470_length_146726_cov_34.080093	AUGUSTUS	gene	69019	72901	0.97	-	.	g50
NODE_1470_length_146726_cov_34.080093	AUGUSTUS	transcript	69019	72901	0.97	-	.	g50.t1
NODE_1470_length_146726_cov_34.080093	AUGUSTUS	stop_codon	69019	69021	.	-	0	transcript_id "g50.t1"; gene_id "g50";
NODE_1470_length_146726_cov_34.080093	AUGUSTUS	intron	69687	69781	1	-	.	transcript_id "g50.t1"; gene_id "g50";
NODE_1470_length_146726_cov_34.080093	AUGUSTUS	intron	72339	72412	1	-	.	transcript_id "g50.t1"; gene_id "g50";
NODE_1470_length_146726_cov_34.080093	AUGUSTUS	intron	72562	72840	0.97	-	.	transcript_id "g50.t1"; gene_id "g50";
NODE_1470_length_146726_cov_34.080093	AUGUSTUS	CDS	69019	69686	1	-	2	transcript_id "g50.t1"; gene_id "g50";
NODE_1470_length_146726_cov_34.080093	AUGUSTUS	CDS	69782	72338	1	-	0	transcript_id "g50.t1"; gene_id "g50";
NODE_1470_length_146726_cov_34.080093	AUGUSTUS	CDS	72413	72561	1	-	2	transcript_id "g50.t1"; gene_id "g50";
NODE_1470_length_146726_cov_34.080093	AUGUSTUS	CDS	72841	72901	0.97	-	0	transcript_id "g50.t1"; gene_id "g50";
NODE_1470_length_146726_cov_34.080093	AUGUSTUS	start_codon	72899	72901	.	-	0	transcript_id "g50.t1"; gene_id "g50";
NODE_1470_length_146726_cov_34.080093	AUGUSTUS	gene	73358	73972	0.8	-	.	g51
NODE_1470_length_146726_cov_34.080093	AUGUSTUS	transcript	73358	73972	0.8	-	.	g51.t1
NODE_1470_length_146726_cov_34.080093	AUGUSTUS	stop_codon	73358	73360	.	-	0	transcript_id "g51.t1"; gene_id "g51";
NODE_1470_length_146726_cov_34.080093	AUGUSTUS	intron	73588	73647	0.98	-	.	transcript_id "g51.t1"; gene_id "g51";
NODE_1470_length_146726_cov_34.080093	AUGUSTUS	CDS	73358	73587	0.98	-	2	transcript_id "g51.t1"; gene_id "g51";
NODE_1470_length_146726_cov_34.080093	AUGUSTUS	CDS	73648	73972	0.81	-	0	transcript_id "g51.t1"; gene_id "g51";
NODE_1470_length_146726_cov_34.080093	AUGUSTUS	start_codon	73970	73972	.	-	0	transcript_id "g51.t1"; gene_id "g51";
NODE_1470_length_146726_cov_34.080093	AUGUSTUS	gene	74181	74745	0.97	+	.	g52
NODE_1470_length_146726_cov_34.080093	AUGUSTUS	transcript	74181	74745	0.97	+	.	g52.t1
NODE_1470_length_146726_cov_34.080093	AUGUSTUS	start_codon	74181	74183	.	+	0	transcript_id "g52.t1"; gene_id "g52";
NODE_1470_length_146726_cov_34.080093	AUGUSTUS	intron	74239	74298	1	+	.	transcript_id "g52.t1"; gene_id "g52";
NODE_1470_length_146726_cov_34.080093	AUGUSTUS	intron	74463	74541	1	+	.	transcript_id "g52.t1"; gene_id "g52";
NODE_1470_length_146726_cov_34.080093	AUGUSTUS	CDS	74181	74238	0.97	+	0	transcript_id "g52.t1"; gene_id "g52";
NODE_1470_length_146726_cov_34.080093	AUGUSTUS	CDS	74299	74462	1	+	2	transcript_id "g52.t1"; gene_id "g52";
NODE_1470_length_146726_cov_34.080093	AUGUSTUS	CDS	74542	74745	1	+	0	transcript_id "g52.t1"; gene_id "g52";
NODE_1470_length_146726_cov_34.080093	AUGUSTUS	stop_codon	74743	74745	.	+	0	transcript_id "g52.t1"; gene_id "g52";
NODE_1470_length_146726_cov_34.080093	AUGUSTUS	gene	76831	80100	1	-	.	g53
NODE_1470_length_146726_cov_34.080093	AUGUSTUS	transcript	76831	80100	1	-	.	g53.t1
NODE_1470_length_146726_cov_34.080093	AUGUSTUS	stop_codon	76831	76833	.	-	0	transcript_id "g53.t1"; gene_id "g53";
NODE_1470_length_146726_cov_34.080093	AUGUSTUS	CDS	76831	80100	1	-	0	transcript_id "g53.t1"; gene_id "g53";
NODE_1470_length_146726_cov_34.080093	AUGUSTUS	start_codon	80098	80100	.	-	0	transcript_id "g53.t1"; gene_id "g53";
NODE_1470_length_146726_cov_34.080093	AUGUSTUS	gene	82871	83329	0.88	-	.	g54
NODE_1470_length_146726_cov_34.080093	AUGUSTUS	transcript	82871	83329	0.88	-	.	g54.t1
NODE_1470_length_146726_cov_34.080093	AUGUSTUS	stop_codon	82871	82873	.	-	0	transcript_id "g54.t1"; gene_id "g54";
NODE_1470_length_146726_cov_34.080093	AUGUSTUS	CDS	82871	83329	0.88	-	0	transcript_id "g54.t1"; gene_id "g54";
NODE_1470_length_146726_cov_34.080093	AUGUSTUS	start_codon	83327	83329	.	-	0	transcript_id "g54.t1"; gene_id "g54";
NODE_1470_length_146726_cov_34.080093	AUGUSTUS	gene	84498	86691	1	-	.	g55
NODE_1470_length_146726_cov_34.080093	AUGUSTUS	transcript	84498	86691	1	-	.	g55.t1
NODE_1470_length_146726_cov_34.080093	AUGUSTUS	stop_codon	84498	84500	.	-	0	transcript_id "g55.t1"; gene_id "g55";
NODE_1470_length_146726_cov_34.080093	AUGUSTUS	intron	86460	86520	1	-	.	transcript_id "g55.t1"; gene_id "g55";
NODE_1470_length_146726_cov_34.080093	AUGUSTUS	CDS	84498	86459	1	-	0	transcript_id "g55.t1"; gene_id "g55";
NODE_1470_length_146726_cov_34.080093	AUGUSTUS	CDS	86521	86691	1	-	0	transcript_id "g55.t1"; gene_id "g55";
NODE_1470_length_146726_cov_34.080093	AUGUSTUS	start_codon	86689	86691	.	-	0	transcript_id "g55.t1"; gene_id "g55";
NODE_1470_length_146726_cov_34.080093	AUGUSTUS	gene	86717	89684	0.23	-	.	g56
NODE_1470_length_146726_cov_34.080093	AUGUSTUS	transcript	86717	89684	0.23	-	.	g56.t1
NODE_1470_length_146726_cov_34.080093	AUGUSTUS	stop_codon	86717	86719	.	-	0	transcript_id "g56.t1"; gene_id "g56";
NODE_1470_length_146726_cov_34.080093	AUGUSTUS	intron	87013	87970	0.51	-	.	transcript_id "g56.t1"; gene_id "g56";
NODE_1470_length_146726_cov_34.080093	AUGUSTUS	intron	88231	88299	0.86	-	.	transcript_id "g56.t1"; gene_id "g56";
NODE_1470_length_146726_cov_34.080093	AUGUSTUS	intron	88919	89614	0.57	-	.	transcript_id "g56.t1"; gene_id "g56";
NODE_1470_length_146726_cov_34.080093	AUGUSTUS	CDS	86717	87012	0.51	-	2	transcript_id "g56.t1"; gene_id "g56";
NODE_1470_length_146726_cov_34.080093	AUGUSTUS	CDS	87971	88230	0.76	-	1	transcript_id "g56.t1"; gene_id "g56";
NODE_1470_length_146726_cov_34.080093	AUGUSTUS	CDS	88300	88918	0.85	-	2	transcript_id "g56.t1"; gene_id "g56";
NODE_1470_length_146726_cov_34.080093	AUGUSTUS	CDS	89615	89684	0.83	-	0	transcript_id "g56.t1"; gene_id "g56";
NODE_1470_length_146726_cov_34.080093	AUGUSTUS	start_codon	89682	89684	.	-	0	transcript_id "g56.t1"; gene_id "g56";
NODE_1470_length_146726_cov_34.080093	AUGUSTUS	gene	90199	91512	0.89	-	.	g57
NODE_1470_length_146726_cov_34.080093	AUGUSTUS	transcript	90199	91512	0.89	-	.	g57.t1
NODE_1470_length_146726_cov_34.080093	AUGUSTUS	stop_codon	90199	90201	.	-	0	transcript_id "g57.t1"; gene_id "g57";
NODE_1470_length_146726_cov_34.080093	AUGUSTUS	intron	90487	90561	0.98	-	.	transcript_id "g57.t1"; gene_id "g57";
NODE_1470_length_146726_cov_34.080093	AUGUSTUS	intron	90819	91409	1	-	.	transcript_id "g57.t1"; gene_id "g57";
NODE_1470_length_146726_cov_34.080093	AUGUSTUS	CDS	90199	90486	0.98	-	0	transcript_id "g57.t1"; gene_id "g57";
NODE_1470_length_146726_cov_34.080093	AUGUSTUS	CDS	90562	90818	1	-	2	transcript_id "g57.t1"; gene_id "g57";
NODE_1470_length_146726_cov_34.080093	AUGUSTUS	CDS	91410	91512	0.91	-	0	transcript_id "g57.t1"; gene_id "g57";
NODE_1470_length_146726_cov_34.080093	AUGUSTUS	start_codon	91510	91512	.	-	0	transcript_id "g57.t1"; gene_id "g57";
NODE_1470_length_146726_cov_34.080093	AUGUSTUS	gene	92521	93333	0.98	+	.	g58
NODE_1470_length_146726_cov_34.080093	AUGUSTUS	transcript	92521	93333	0.98	+	.	g58.t1
NODE_1470_length_146726_cov_34.080093	AUGUSTUS	start_codon	92521	92523	.	+	0	transcript_id "g58.t1"; gene_id "g58";
NODE_1470_length_146726_cov_34.080093	AUGUSTUS	intron	92627	92731	1	+	.	transcript_id "g58.t1"; gene_id "g58";
NODE_1470_length_146726_cov_34.080093	AUGUSTUS	CDS	92521	92626	0.98	+	0	transcript_id "g58.t1"; gene_id "g58";
NODE_1470_length_146726_cov_34.080093	AUGUSTUS	CDS	92732	93333	1	+	2	transcript_id "g58.t1"; gene_id "g58";
NODE_1470_length_146726_cov_34.080093	AUGUSTUS	stop_codon	93331	93333	.	+	0	transcript_id "g58.t1"; gene_id "g58";
NODE_1470_length_146726_cov_34.080093	AUGUSTUS	gene	95894	99020	0.79	-	.	g59
NODE_1470_length_146726_cov_34.080093	AUGUSTUS	transcript	95894	99020	0.79	-	.	g59.t1
NODE_1470_length_146726_cov_34.080093	AUGUSTUS	stop_codon	95894	95896	.	-	0	transcript_id "g59.t1"; gene_id "g59";
NODE_1470_length_146726_cov_34.080093	AUGUSTUS	intron	96175	96246	0.92	-	.	transcript_id "g59.t1"; gene_id "g59";
NODE_1470_length_146726_cov_34.080093	AUGUSTUS	intron	96654	96733	1	-	.	transcript_id "g59.t1"; gene_id "g59";
NODE_1470_length_146726_cov_34.080093	AUGUSTUS	intron	97116	97527	0.85	-	.	transcript_id "g59.t1"; gene_id "g59";
NODE_1470_length_146726_cov_34.080093	AUGUSTUS	intron	98032	98484	1	-	.	transcript_id "g59.t1"; gene_id "g59";
NODE_1470_length_146726_cov_34.080093	AUGUSTUS	intron	98922	98997	1	-	.	transcript_id "g59.t1"; gene_id "g59";
NODE_1470_length_146726_cov_34.080093	AUGUSTUS	CDS	95894	96174	0.92	-	2	transcript_id "g59.t1"; gene_id "g59";
NODE_1470_length_146726_cov_34.080093	AUGUSTUS	CDS	96247	96653	1	-	1	transcript_id "g59.t1"; gene_id "g59";
NODE_1470_length_146726_cov_34.080093	AUGUSTUS	CDS	96734	97115	0.88	-	2	transcript_id "g59.t1"; gene_id "g59";
NODE_1470_length_146726_cov_34.080093	AUGUSTUS	CDS	97528	98031	0.98	-	2	transcript_id "g59.t1"; gene_id "g59";
NODE_1470_length_146726_cov_34.080093	AUGUSTUS	CDS	98485	98921	1	-	1	transcript_id "g59.t1"; gene_id "g59";
NODE_1470_length_146726_cov_34.080093	AUGUSTUS	CDS	98998	99020	1	-	0	transcript_id "g59.t1"; gene_id "g59";
NODE_1470_length_146726_cov_34.080093	AUGUSTUS	start_codon	99018	99020	.	-	0	transcript_id "g59.t1"; gene_id "g59";
NODE_1470_length_146726_cov_34.080093	AUGUSTUS	gene	99903	101108	0.99	-	.	g60
NODE_1470_length_146726_cov_34.080093	AUGUSTUS	transcript	99903	101108	0.99	-	.	g60.t1
NODE_1470_length_146726_cov_34.080093	AUGUSTUS	stop_codon	99903	99905	.	-	0	transcript_id "g60.t1"; gene_id "g60";
NODE_1470_length_146726_cov_34.080093	AUGUSTUS	intron	100311	100394	1	-	.	transcript_id "g60.t1"; gene_id "g60";
NODE_1470_length_146726_cov_34.080093	AUGUSTUS	CDS	99903	100310	1	-	0	transcript_id "g60.t1"; gene_id "g60";
NODE_1470_length_146726_cov_34.080093	AUGUSTUS	CDS	100395	101108	0.99	-	0	transcript_id "g60.t1"; gene_id "g60";
NODE_1470_length_146726_cov_34.080093	AUGUSTUS	start_codon	101106	101108	.	-	0	transcript_id "g60.t1"; gene_id "g60";
NODE_1470_length_146726_cov_34.080093	AUGUSTUS	gene	109104	109328	0.55	-	.	g61
NODE_1470_length_146726_cov_34.080093	AUGUSTUS	transcript	109104	109328	0.55	-	.	g61.t1
NODE_1470_length_146726_cov_34.080093	AUGUSTUS	stop_codon	109104	109106	.	-	0	transcript_id "g61.t1"; gene_id "g61";
NODE_1470_length_146726_cov_34.080093	AUGUSTUS	CDS	109104	109328	0.55	-	0	transcript_id "g61.t1"; gene_id "g61";
NODE_1470_length_146726_cov_34.080093	AUGUSTUS	start_codon	109326	109328	.	-	0	transcript_id "g61.t1"; gene_id "g61";
NODE_1470_length_146726_cov_34.080093	AUGUSTUS	gene	118494	119186	0.48	-	.	g62
NODE_1470_length_146726_cov_34.080093	AUGUSTUS	transcript	118494	119186	0.48	-	.	g62.t1
NODE_1470_length_146726_cov_34.080093	AUGUSTUS	stop_codon	118494	118496	.	-	0	transcript_id "g62.t1"; gene_id "g62";
NODE_1470_length_146726_cov_34.080093	AUGUSTUS	intron	118944	119117	0.73	-	.	transcript_id "g62.t1"; gene_id "g62";
NODE_1470_length_146726_cov_34.080093	AUGUSTUS	CDS	118494	118943	0.54	-	0	transcript_id "g62.t1"; gene_id "g62";
NODE_1470_length_146726_cov_34.080093	AUGUSTUS	CDS	119118	119186	0.77	-	0	transcript_id "g62.t1"; gene_id "g62";
NODE_1470_length_146726_cov_34.080093	AUGUSTUS	start_codon	119184	119186	.	-	0	transcript_id "g62.t1"; gene_id "g62";
NODE_1470_length_146726_cov_34.080093	AUGUSTUS	gene	120187	120483	0.65	-	.	g63
NODE_1470_length_146726_cov_34.080093	AUGUSTUS	transcript	120187	120483	0.65	-	.	g63.t1
NODE_1470_length_146726_cov_34.080093	AUGUSTUS	stop_codon	120187	120189	.	-	0	transcript_id "g63.t1"; gene_id "g63";
NODE_1470_length_146726_cov_34.080093	AUGUSTUS	CDS	120187	120483	0.65	-	0	transcript_id "g63.t1"; gene_id "g63";
NODE_1470_length_146726_cov_34.080093	AUGUSTUS	start_codon	120481	120483	.	-	0	transcript_id "g63.t1"; gene_id "g63";
NODE_1470_length_146726_cov_34.080093	AUGUSTUS	gene	126377	133829	0.24	+	.	g64
NODE_1470_length_146726_cov_34.080093	AUGUSTUS	transcript	126377	133829	0.24	+	.	g64.t1
NODE_1470_length_146726_cov_34.080093	AUGUSTUS	start_codon	126377	126379	.	+	0	transcript_id "g64.t1"; gene_id "g64";
NODE_1470_length_146726_cov_34.080093	AUGUSTUS	intron	126387	126459	0.44	+	.	transcript_id "g64.t1"; gene_id "g64";
NODE_1470_length_146726_cov_34.080093	AUGUSTUS	intron	126715	130033	0.57	+	.	transcript_id "g64.t1"; gene_id "g64";
NODE_1470_length_146726_cov_34.080093	AUGUSTUS	intron	130099	133721	0.52	+	.	transcript_id "g64.t1"; gene_id "g64";
NODE_1470_length_146726_cov_34.080093	AUGUSTUS	CDS	126377	126386	0.44	+	0	transcript_id "g64.t1"; gene_id "g64";
NODE_1470_length_146726_cov_34.080093	AUGUSTUS	CDS	126460	126714	0.45	+	2	transcript_id "g64.t1"; gene_id "g64";
NODE_1470_length_146726_cov_34.080093	AUGUSTUS	CDS	130034	130098	0.52	+	2	transcript_id "g64.t1"; gene_id "g64";
NODE_1470_length_146726_cov_34.080093	AUGUSTUS	CDS	133722	133829	0.86	+	0	transcript_id "g64.t1"; gene_id "g64";
NODE_1470_length_146726_cov_34.080093	AUGUSTUS	stop_codon	133827	133829	.	+	0	transcript_id "g64.t1"; gene_id "g64";
NODE_1470_length_146726_cov_34.080093	AUGUSTUS	gene	139215	143788	0.2	-	.	g65
NODE_1470_length_146726_cov_34.080093	AUGUSTUS	transcript	139215	143788	0.2	-	.	g65.t1
NODE_1470_length_146726_cov_34.080093	AUGUSTUS	stop_codon	139215	139217	.	-	0	transcript_id "g65.t1"; gene_id "g65";
NODE_1470_length_146726_cov_34.080093	AUGUSTUS	intron	139420	143555	0.29	-	.	transcript_id "g65.t1"; gene_id "g65";
NODE_1470_length_146726_cov_34.080093	AUGUSTUS	CDS	139215	139419	0.77	-	1	transcript_id "g65.t1"; gene_id "g65";
NODE_1470_length_146726_cov_34.080093	AUGUSTUS	CDS	143556	143788	0.36	-	0	transcript_id "g65.t1"; gene_id "g65";
NODE_1470_length_146726_cov_34.080093	AUGUSTUS	start_codon	143786	143788	.	-	0	transcript_id "g65.t1"; gene_id "g65";
NODE_1471_length_43501_cov_27.562469	AUGUSTUS	gene	111	31740	0.16	-	.	g66
NODE_1471_length_43501_cov_27.562469	AUGUSTUS	transcript	111	31740	0.16	-	.	g66.t1
NODE_1471_length_43501_cov_27.562469	AUGUSTUS	stop_codon	111	113	.	-	0	transcript_id "g66.t1"; gene_id "g66";
NODE_1471_length_43501_cov_27.562469	AUGUSTUS	intron	2509	2888	0.69	-	.	transcript_id "g66.t1"; gene_id "g66";
NODE_1471_length_43501_cov_27.562469	AUGUSTUS	intron	2944	3668	0.98	-	.	transcript_id "g66.t1"; gene_id "g66";
NODE_1471_length_43501_cov_27.562469	AUGUSTUS	intron	3918	4183	1	-	.	transcript_id "g66.t1"; gene_id "g66";
NODE_1471_length_43501_cov_27.562469	AUGUSTUS	intron	4248	17920	0.98	-	.	transcript_id "g66.t1"; gene_id "g66";
NODE_1471_length_43501_cov_27.562469	AUGUSTUS	intron	18227	31725	0.24	-	.	transcript_id "g66.t1"; gene_id "g66";
NODE_1471_length_43501_cov_27.562469	AUGUSTUS	CDS	111	2508	0.94	-	1	transcript_id "g66.t1"; gene_id "g66";
NODE_1471_length_43501_cov_27.562469	AUGUSTUS	CDS	2889	2943	0.98	-	2	transcript_id "g66.t1"; gene_id "g66";
NODE_1471_length_43501_cov_27.562469	AUGUSTUS	CDS	3669	3917	0.99	-	2	transcript_id "g66.t1"; gene_id "g66";
NODE_1471_length_43501_cov_27.562469	AUGUSTUS	CDS	4184	4247	1	-	0	transcript_id "g66.t1"; gene_id "g66";
NODE_1471_length_43501_cov_27.562469	AUGUSTUS	CDS	17921	18226	0.99	-	0	transcript_id "g66.t1"; gene_id "g66";
NODE_1471_length_43501_cov_27.562469	AUGUSTUS	CDS	31726	31740	0.26	-	0	transcript_id "g66.t1"; gene_id "g66";
NODE_1471_length_43501_cov_27.562469	AUGUSTUS	start_codon	31738	31740	.	-	0	transcript_id "g66.t1"; gene_id "g66";
NODE_1514_length_157_cov_106.146500	AUGUSTUS	gene	1	241	0.67	+	.	g67
NODE_1514_length_157_cov_106.146500	AUGUSTUS	transcript	1	241	0.67	+	.	g67.t1
NODE_1514_length_157_cov_106.146500	AUGUSTUS	CDS	1	241	0.67	+	1	transcript_id "g67.t1"; gene_id "g67";
NODE_1553_length_296_cov_239.925674	AUGUSTUS	gene	1	243	0.33	-	.	g68
NODE_1553_length_296_cov_239.925674	AUGUSTUS	transcript	1	243	0.33	-	.	g68.t1
NODE_1553_length_296_cov_239.925674	AUGUSTUS	intron	1	44	0.4	-	.	transcript_id "g68.t1"; gene_id "g68";
NODE_1553_length_296_cov_239.925674	AUGUSTUS	CDS	45	243	0.33	-	0	transcript_id "g68.t1"; gene_id "g68";
NODE_1553_length_296_cov_239.925674	AUGUSTUS	start_codon	241	243	.	-	0	transcript_id "g68.t1"; gene_id "g68";
NODE_1635_length_23867_cov_28.961285	AUGUSTUS	gene	16115	23951	0.21	-	.	g69
NODE_1635_length_23867_cov_28.961285	AUGUSTUS	transcript	16115	23951	0.21	-	.	g69.t1
NODE_1635_length_23867_cov_28.961285	AUGUSTUS	stop_codon	16115	16117	.	-	0	transcript_id "g69.t1"; gene_id "g69";
NODE_1635_length_23867_cov_28.961285	AUGUSTUS	intron	16331	23951	0.21	-	.	transcript_id "g69.t1"; gene_id "g69";
NODE_1635_length_23867_cov_28.961285	AUGUSTUS	CDS	16115	16330	0.98	-	0	transcript_id "g69.t1"; gene_id "g69";
NODE_1652_length_217_cov_206.580643	AUGUSTUS	gene	1	301	1	+	.	g70
NODE_1652_length_217_cov_206.580643	AUGUSTUS	transcript	1	301	1	+	.	g70.t1
NODE_1652_length_217_cov_206.580643	AUGUSTUS	CDS	1	301	1	+	1	transcript_id "g70.t1"; gene_id "g70";
NODE_1695_length_68030_cov_29.407291	AUGUSTUS	gene	28229	31856	0.52	+	.	g71
NODE_1695_length_68030_cov_29.407291	AUGUSTUS	transcript	28229	31856	0.52	+	.	g71.t1
NODE_1695_length_68030_cov_29.407291	AUGUSTUS	start_codon	28229	28231	.	+	0	transcript_id "g71.t1"; gene_id "g71";
NODE_1695_length_68030_cov_29.407291	AUGUSTUS	intron	28484	31784	0.62	+	.	transcript_id "g71.t1"; gene_id "g71";
NODE_1695_length_68030_cov_29.407291	AUGUSTUS	CDS	28229	28483	0.63	+	0	transcript_id "g71.t1"; gene_id "g71";
NODE_1695_length_68030_cov_29.407291	AUGUSTUS	CDS	31785	31856	0.87	+	0	transcript_id "g71.t1"; gene_id "g71";
NODE_1695_length_68030_cov_29.407291	AUGUSTUS	stop_codon	31854	31856	.	+	0	transcript_id "g71.t1"; gene_id "g71";
NODE_1695_length_68030_cov_29.407291	AUGUSTUS	gene	39614	40081	0.72	-	.	g72
NODE_1695_length_68030_cov_29.407291	AUGUSTUS	transcript	39614	40081	0.72	-	.	g72.t1
NODE_1695_length_68030_cov_29.407291	AUGUSTUS	stop_codon	39614	39616	.	-	0	transcript_id "g72.t1"; gene_id "g72";
NODE_1695_length_68030_cov_29.407291	AUGUSTUS	CDS	39614	40081	0.72	-	0	transcript_id "g72.t1"; gene_id "g72";
NODE_1695_length_68030_cov_29.407291	AUGUSTUS	start_codon	40079	40081	.	-	0	transcript_id "g72.t1"; gene_id "g72";
NODE_1702_length_291_cov_210.206192	AUGUSTUS	gene	1	375	0.97	+	.	g73
NODE_1702_length_291_cov_210.206192	AUGUSTUS	transcript	1	375	0.97	+	.	g73.t1
NODE_1702_length_291_cov_210.206192	AUGUSTUS	intron	1	141	0.97	+	.	transcript_id "g73.t1"; gene_id "g73";
NODE_1702_length_291_cov_210.206192	AUGUSTUS	CDS	142	375	1	+	0	transcript_id "g73.t1"; gene_id "g73";
NODE_1708_length_6314_cov_18.955971	AUGUSTUS	gene	1	1276	0.59	-	.	g74
NODE_1708_length_6314_cov_18.955971	AUGUSTUS	transcript	1	1276	0.59	-	.	g74.t1
NODE_1708_length_6314_cov_18.955971	AUGUSTUS	intron	91	164	1	-	.	transcript_id "g74.t1"; gene_id "g74";
NODE_1708_length_6314_cov_18.955971	AUGUSTUS	intron	862	1051	1	-	.	transcript_id "g74.t1"; gene_id "g74";
NODE_1708_length_6314_cov_18.955971	AUGUSTUS	intron	1121	1268	0.79	-	.	transcript_id "g74.t1"; gene_id "g74";
NODE_1708_length_6314_cov_18.955971	AUGUSTUS	CDS	1	90	0.72	-	0	transcript_id "g74.t1"; gene_id "g74";
NODE_1708_length_6314_cov_18.955971	AUGUSTUS	CDS	165	861	1	-	1	transcript_id "g74.t1"; gene_id "g74";
NODE_1708_length_6314_cov_18.955971	AUGUSTUS	CDS	1052	1120	1	-	1	transcript_id "g74.t1"; gene_id "g74";
NODE_1708_length_6314_cov_18.955971	AUGUSTUS	CDS	1269	1276	0.79	-	0	transcript_id "g74.t1"; gene_id "g74";
NODE_1708_length_6314_cov_18.955971	AUGUSTUS	start_codon	1274	1276	.	-	0	transcript_id "g74.t1"; gene_id "g74";
NODE_1814_length_170255_cov_32.992733	AUGUSTUS	gene	413	1165	0.91	-	.	g75
NODE_1814_length_170255_cov_32.992733	AUGUSTUS	transcript	413	1165	0.91	-	.	g75.t1
NODE_1814_length_170255_cov_32.992733	AUGUSTUS	stop_codon	413	415	.	-	0	transcript_id "g75.t1"; gene_id "g75";
NODE_1814_length_170255_cov_32.992733	AUGUSTUS	CDS	413	1165	0.91	-	0	transcript_id "g75.t1"; gene_id "g75";
NODE_1814_length_170255_cov_32.992733	AUGUSTUS	start_codon	1163	1165	.	-	0	transcript_id "g75.t1"; gene_id "g75";
NODE_1814_length_170255_cov_32.992733	AUGUSTUS	gene	2380	8537	0.56	-	.	g76
NODE_1814_length_170255_cov_32.992733	AUGUSTUS	transcript	2380	8537	0.56	-	.	g76.t1
NODE_1814_length_170255_cov_32.992733	AUGUSTUS	stop_codon	2380	2382	.	-	0	transcript_id "g76.t1"; gene_id "g76";
NODE_1814_length_170255_cov_32.992733	AUGUSTUS	intron	2731	2821	1	-	.	transcript_id "g76.t1"; gene_id "g76";
NODE_1814_length_170255_cov_32.992733	AUGUSTUS	intron	2919	2995	1	-	.	transcript_id "g76.t1"; gene_id "g76";
NODE_1814_length_170255_cov_32.992733	AUGUSTUS	intron	3244	3337	1	-	.	transcript_id "g76.t1"; gene_id "g76";
NODE_1814_length_170255_cov_32.992733	AUGUSTUS	intron	3453	4237	0.99	-	.	transcript_id "g76.t1"; gene_id "g76";
NODE_1814_length_170255_cov_32.992733	AUGUSTUS	intron	5674	5761	0.94	-	.	transcript_id "g76.t1"; gene_id "g76";
NODE_1814_length_170255_cov_32.992733	AUGUSTUS	intron	6859	6937	1	-	.	transcript_id "g76.t1"; gene_id "g76";
NODE_1814_length_170255_cov_32.992733	AUGUSTUS	intron	8073	8145	0.85	-	.	transcript_id "g76.t1"; gene_id "g76";
NODE_1814_length_170255_cov_32.992733	AUGUSTUS	intron	8351	8427	0.79	-	.	transcript_id "g76.t1"; gene_id "g76";
NODE_1814_length_170255_cov_32.992733	AUGUSTUS	CDS	2380	2730	1	-	0	transcript_id "g76.t1"; gene_id "g76";
NODE_1814_length_170255_cov_32.992733	AUGUSTUS	CDS	2822	2918	1	-	1	transcript_id "g76.t1"; gene_id "g76";
NODE_1814_length_170255_cov_32.992733	AUGUSTUS	CDS	2996	3243	1	-	0	transcript_id "g76.t1"; gene_id "g76";
NODE_1814_length_170255_cov_32.992733	AUGUSTUS	CDS	3338	3452	0.99	-	1	transcript_id "g76.t1"; gene_id "g76";
NODE_1814_length_170255_cov_32.992733	AUGUSTUS	CDS	4238	5673	0.94	-	0	transcript_id "g76.t1"; gene_id "g76";
NODE_1814_length_170255_cov_32.992733	AUGUSTUS	CDS	5762	6858	0.94	-	2	transcript_id "g76.t1"; gene_id "g76";
NODE_1814_length_170255_cov_32.992733	AUGUSTUS	CDS	6938	8072	0.86	-	0	transcript_id "g76.t1"; gene_id "g76";
NODE_1814_length_170255_cov_32.992733	AUGUSTUS	CDS	8146	8350	0.97	-	1	transcript_id "g76.t1"; gene_id "g76";
NODE_1814_length_170255_cov_32.992733	AUGUSTUS	CDS	8428	8537	0.68	-	0	transcript_id "g76.t1"; gene_id "g76";
NODE_1814_length_170255_cov_32.992733	AUGUSTUS	start_codon	8535	8537	.	-	0	transcript_id "g76.t1"; gene_id "g76";
NODE_1814_length_170255_cov_32.992733	AUGUSTUS	gene	10094	12503	0.19	-	.	g77
NODE_1814_length_170255_cov_32.992733	AUGUSTUS	transcript	10094	12503	0.19	-	.	g77.t1
NODE_1814_length_170255_cov_32.992733	AUGUSTUS	stop_codon	10094	10096	.	-	0	transcript_id "g77.t1"; gene_id "g77";
NODE_1814_length_170255_cov_32.992733	AUGUSTUS	intron	10391	10455	0.38	-	.	transcript_id "g77.t1"; gene_id "g77";
NODE_1814_length_170255_cov_32.992733	AUGUSTUS	intron	10573	10651	0.68	-	.	transcript_id "g77.t1"; gene_id "g77";
NODE_1814_length_170255_cov_32.992733	AUGUSTUS	intron	11244	11323	1	-	.	transcript_id "g77.t1"; gene_id "g77";
NODE_1814_length_170255_cov_32.992733	AUGUSTUS	intron	11941	12025	0.76	-	.	transcript_id "g77.t1"; gene_id "g77";
NODE_1814_length_170255_cov_32.992733	AUGUSTUS	intron	12141	12216	0.82	-	.	transcript_id "g77.t1"; gene_id "g77";
NODE_1814_length_170255_cov_32.992733	AUGUSTUS	CDS	10094	10390	0.28	-	0	transcript_id "g77.t1"; gene_id "g77";
NODE_1814_length_170255_cov_32.992733	AUGUSTUS	CDS	10456	10572	0.67	-	0	transcript_id "g77.t1"; gene_id "g77";
NODE_1814_length_170255_cov_32.992733	AUGUSTUS	CDS	10652	11243	0.92	-	1	transcript_id "g77.t1"; gene_id "g77";
NODE_1814_length_170255_cov_32.992733	AUGUSTUS	CDS	11324	11940	0.91	-	0	transcript_id "g77.t1"; gene_id "g77";
NODE_1814_length_170255_cov_32.992733	AUGUSTUS	CDS	12026	12140	0.82	-	1	transcript_id "g77.t1"; gene_id "g77";
NODE_1814_length_170255_cov_32.992733	AUGUSTUS	CDS	12217	12503	0.76	-	0	transcript_id "g77.t1"; gene_id "g77";
NODE_1814_length_170255_cov_32.992733	AUGUSTUS	start_codon	12501	12503	.	-	0	transcript_id "g77.t1"; gene_id "g77";
NODE_1814_length_170255_cov_32.992733	AUGUSTUS	gene	13238	18018	0.28	+	.	g78
NODE_1814_length_170255_cov_32.992733	AUGUSTUS	transcript	13238	18018	0.28	+	.	g78.t1
NODE_1814_length_170255_cov_32.992733	AUGUSTUS	start_codon	13238	13240	.	+	0	transcript_id "g78.t1"; gene_id "g78";
NODE_1814_length_170255_cov_32.992733	AUGUSTUS	intron	13283	13351	0.81	+	.	transcript_id "g78.t1"; gene_id "g78";
NODE_1814_length_170255_cov_32.992733	AUGUSTUS	intron	13842	16865	0.72	+	.	transcript_id "g78.t1"; gene_id "g78";
NODE_1814_length_170255_cov_32.992733	AUGUSTUS	intron	17523	17600	0.68	+	.	transcript_id "g78.t1"; gene_id "g78";
NODE_1814_length_170255_cov_32.992733	AUGUSTUS	intron	17666	17728	0.73	+	.	transcript_id "g78.t1"; gene_id "g78";
NODE_1814_length_170255_cov_32.992733	AUGUSTUS	intron	17879	17949	1	+	.	transcript_id "g78.t1"; gene_id "g78";
NODE_1814_length_170255_cov_32.992733	AUGUSTUS	CDS	13238	13282	0.85	+	0	transcript_id "g78.t1"; gene_id "g78";
NODE_1814_length_170255_cov_32.992733	AUGUSTUS	CDS	13352	13841	0.8	+	0	transcript_id "g78.t1"; gene_id "g78";
NODE_1814_length_170255_cov_32.992733	AUGUSTUS	CDS	16866	17522	0.8	+	2	transcript_id "g78.t1"; gene_id "g78";
NODE_1814_length_170255_cov_32.992733	AUGUSTUS	CDS	17601	17665	0.54	+	2	transcript_id "g78.t1"; gene_id "g78";
NODE_1814_length_170255_cov_32.992733	AUGUSTUS	CDS	17729	17878	0.74	+	0	transcript_id "g78.t1"; gene_id "g78";
NODE_1814_length_170255_cov_32.992733	AUGUSTUS	CDS	17950	18018	1	+	0	transcript_id "g78.t1"; gene_id "g78";
NODE_1814_length_170255_cov_32.992733	AUGUSTUS	stop_codon	18016	18018	.	+	0	transcript_id "g78.t1"; gene_id "g78";
NODE_1814_length_170255_cov_32.992733	AUGUSTUS	gene	18126	20327	0.82	-	.	g79
NODE_1814_length_170255_cov_32.992733	AUGUSTUS	transcript	18126	20327	0.82	-	.	g79.t1
NODE_1814_length_170255_cov_32.992733	AUGUSTUS	stop_codon	18126	18128	.	-	0	transcript_id "g79.t1"; gene_id "g79";
NODE_1814_length_170255_cov_32.992733	AUGUSTUS	intron	18247	18600	0.97	-	.	transcript_id "g79.t1"; gene_id "g79";
NODE_1814_length_170255_cov_32.992733	AUGUSTUS	CDS	18126	18246	1	-	1	transcript_id "g79.t1"; gene_id "g79";
NODE_1814_length_170255_cov_32.992733	AUGUSTUS	CDS	18601	20327	0.82	-	0	transcript_id "g79.t1"; gene_id "g79";
NODE_1814_length_170255_cov_32.992733	AUGUSTUS	start_codon	20325	20327	.	-	0	transcript_id "g79.t1"; gene_id "g79";
NODE_1814_length_170255_cov_32.992733	AUGUSTUS	gene	24668	31475	0.94	-	.	g80
NODE_1814_length_170255_cov_32.992733	AUGUSTUS	transcript	24668	31475	0.94	-	.	g80.t1
NODE_1814_length_170255_cov_32.992733	AUGUSTUS	stop_codon	24668	24670	.	-	0	transcript_id "g80.t1"; gene_id "g80";
NODE_1814_length_170255_cov_32.992733	AUGUSTUS	intron	25258	26350	1	-	.	transcript_id "g80.t1"; gene_id "g80";
NODE_1814_length_170255_cov_32.992733	AUGUSTUS	intron	26580	31346	0.94	-	.	transcript_id "g80.t1"; gene_id "g80";
NODE_1814_length_170255_cov_32.992733	AUGUSTUS	CDS	24668	25257	1	-	2	transcript_id "g80.t1"; gene_id "g80";
NODE_1814_length_170255_cov_32.992733	AUGUSTUS	CDS	26351	26579	1	-	0	transcript_id "g80.t1"; gene_id "g80";
NODE_1814_length_170255_cov_32.992733	AUGUSTUS	CDS	31347	31475	0.98	-	0	transcript_id "g80.t1"; gene_id "g80";
NODE_1814_length_170255_cov_32.992733	AUGUSTUS	start_codon	31473	31475	.	-	0	transcript_id "g80.t1"; gene_id "g80";
NODE_1814_length_170255_cov_32.992733	AUGUSTUS	gene	34305	41489	0.92	-	.	g81
NODE_1814_length_170255_cov_32.992733	AUGUSTUS	transcript	34305	41489	0.92	-	.	g81.t1
NODE_1814_length_170255_cov_32.992733	AUGUSTUS	stop_codon	34305	34307	.	-	0	transcript_id "g81.t1"; gene_id "g81";
NODE_1814_length_170255_cov_32.992733	AUGUSTUS	intron	34431	34785	1	-	.	transcript_id "g81.t1"; gene_id "g81";
NODE_1814_length_170255_cov_32.992733	AUGUSTUS	intron	34941	35040	1	-	.	transcript_id "g81.t1"; gene_id "g81";
NODE_1814_length_170255_cov_32.992733	AUGUSTUS	intron	35116	35226	1	-	.	transcript_id "g81.t1"; gene_id "g81";
NODE_1814_length_170255_cov_32.992733	AUGUSTUS	intron	37747	37834	1	-	.	transcript_id "g81.t1"; gene_id "g81";
NODE_1814_length_170255_cov_32.992733	AUGUSTUS	intron	40497	40575	1	-	.	transcript_id "g81.t1"; gene_id "g81";
NODE_1814_length_170255_cov_32.992733	AUGUSTUS	intron	40732	40829	0.94	-	.	transcript_id "g81.t1"; gene_id "g81";
NODE_1814_length_170255_cov_32.992733	AUGUSTUS	CDS	34305	34430	1	-	0	transcript_id "g81.t1"; gene_id "g81";
NODE_1814_length_170255_cov_32.992733	AUGUSTUS	CDS	34786	34940	1	-	2	transcript_id "g81.t1"; gene_id "g81";
NODE_1814_length_170255_cov_32.992733	AUGUSTUS	CDS	35041	35115	1	-	2	transcript_id "g81.t1"; gene_id "g81";
NODE_1814_length_170255_cov_32.992733	AUGUSTUS	CDS	35227	37746	1	-	2	transcript_id "g81.t1"; gene_id "g81";
NODE_1814_length_170255_cov_32.992733	AUGUSTUS	CDS	37835	40496	1	-	0	transcript_id "g81.t1"; gene_id "g81";
NODE_1814_length_170255_cov_32.992733	AUGUSTUS	CDS	40576	40731	1	-	0	transcript_id "g81.t1"; gene_id "g81";
NODE_1814_length_170255_cov_32.992733	AUGUSTUS	CDS	40830	41489	0.92	-	0	transcript_id "g81.t1"; gene_id "g81";
NODE_1814_length_170255_cov_32.992733	AUGUSTUS	start_codon	41487	41489	.	-	0	transcript_id "g81.t1"; gene_id "g81";
NODE_1814_length_170255_cov_32.992733	AUGUSTUS	gene	45818	47551	0.99	-	.	g82
NODE_1814_length_170255_cov_32.992733	AUGUSTUS	transcript	45818	47551	0.99	-	.	g82.t1
NODE_1814_length_170255_cov_32.992733	AUGUSTUS	stop_codon	45818	45820	.	-	0	transcript_id "g82.t1"; gene_id "g82";
NODE_1814_length_170255_cov_32.992733	AUGUSTUS	CDS	45818	47551	0.99	-	0	transcript_id "g82.t1"; gene_id "g82";
NODE_1814_length_170255_cov_32.992733	AUGUSTUS	start_codon	47549	47551	.	-	0	transcript_id "g82.t1"; gene_id "g82";
NODE_1814_length_170255_cov_32.992733	AUGUSTUS	gene	53811	54698	0.5	+	.	g83
NODE_1814_length_170255_cov_32.992733	AUGUSTUS	transcript	53811	54698	0.5	+	.	g83.t1
NODE_1814_length_170255_cov_32.992733	AUGUSTUS	start_codon	53811	53813	.	+	0	transcript_id "g83.t1"; gene_id "g83";
NODE_1814_length_170255_cov_32.992733	AUGUSTUS	CDS	53811	54698	0.5	+	0	transcript_id "g83.t1"; gene_id "g83";
NODE_1814_length_170255_cov_32.992733	AUGUSTUS	stop_codon	54696	54698	.	+	0	transcript_id "g83.t1"; gene_id "g83";
NODE_1814_length_170255_cov_32.992733	AUGUSTUS	gene	58087	58845	0.45	+	.	g84
NODE_1814_length_170255_cov_32.992733	AUGUSTUS	transcript	58087	58845	0.45	+	.	g84.t1
NODE_1814_length_170255_cov_32.992733	AUGUSTUS	start_codon	58087	58089	.	+	0	transcript_id "g84.t1"; gene_id "g84";
NODE_1814_length_170255_cov_32.992733	AUGUSTUS	intron	58468	58530	1	+	.	transcript_id "g84.t1"; gene_id "g84";
NODE_1814_length_170255_cov_32.992733	AUGUSTUS	CDS	58087	58467	0.45	+	0	transcript_id "g84.t1"; gene_id "g84";
NODE_1814_length_170255_cov_32.992733	AUGUSTUS	CDS	58531	58845	1	+	0	transcript_id "g84.t1"; gene_id "g84";
NODE_1814_length_170255_cov_32.992733	AUGUSTUS	stop_codon	58843	58845	.	+	0	transcript_id "g84.t1"; gene_id "g84";
NODE_1814_length_170255_cov_32.992733	AUGUSTUS	gene	59887	68762	0.83	-	.	g85
NODE_1814_length_170255_cov_32.992733	AUGUSTUS	transcript	59887	68762	0.83	-	.	g85.t1
NODE_1814_length_170255_cov_32.992733	AUGUSTUS	stop_codon	59887	59889	.	-	0	transcript_id "g85.t1"; gene_id "g85";
NODE_1814_length_170255_cov_32.992733	AUGUSTUS	intron	60169	61729	1	-	.	transcript_id "g85.t1"; gene_id "g85";
NODE_1814_length_170255_cov_32.992733	AUGUSTUS	intron	62942	63028	0.99	-	.	transcript_id "g85.t1"; gene_id "g85";
NODE_1814_length_170255_cov_32.992733	AUGUSTUS	intron	63266	63392	0.97	-	.	transcript_id "g85.t1"; gene_id "g85";
NODE_1814_length_170255_cov_32.992733	AUGUSTUS	intron	63516	68261	0.96	-	.	transcript_id "g85.t1"; gene_id "g85";
NODE_1814_length_170255_cov_32.992733	AUGUSTUS	CDS	59887	60168	1	-	0	transcript_id "g85.t1"; gene_id "g85";
NODE_1814_length_170255_cov_32.992733	AUGUSTUS	CDS	61730	62941	0.99	-	0	transcript_id "g85.t1"; gene_id "g85";
NODE_1814_length_170255_cov_32.992733	AUGUSTUS	CDS	63029	63265	0.99	-	0	transcript_id "g85.t1"; gene_id "g85";
NODE_1814_length_170255_cov_32.992733	AUGUSTUS	CDS	63393	63515	0.97	-	0	transcript_id "g85.t1"; gene_id "g85";
NODE_1814_length_170255_cov_32.992733	AUGUSTUS	CDS	68262	68762	0.86	-	0	transcript_id "g85.t1"; gene_id "g85";
NODE_1814_length_170255_cov_32.992733	AUGUSTUS	start_codon	68760	68762	.	-	0	transcript_id "g85.t1"; gene_id "g85";
NODE_1814_length_170255_cov_32.992733	AUGUSTUS	gene	70799	74633	0.77	-	.	g86
NODE_1814_length_170255_cov_32.992733	AUGUSTUS	transcript	70799	74633	0.77	-	.	g86.t1
NODE_1814_length_170255_cov_32.992733	AUGUSTUS	stop_codon	70799	70801	.	-	0	transcript_id "g86.t1"; gene_id "g86";
NODE_1814_length_170255_cov_32.992733	AUGUSTUS	intron	71056	71863	0.93	-	.	transcript_id "g86.t1"; gene_id "g86";
NODE_1814_length_170255_cov_32.992733	AUGUSTUS	intron	74145	74216	0.9	-	.	transcript_id "g86.t1"; gene_id "g86";
NODE_1814_length_170255_cov_32.992733	AUGUSTUS	intron	74402	74548	1	-	.	transcript_id "g86.t1"; gene_id "g86";
NODE_1814_length_170255_cov_32.992733	AUGUSTUS	CDS	70799	71055	0.86	-	2	transcript_id "g86.t1"; gene_id "g86";
NODE_1814_length_170255_cov_32.992733	AUGUSTUS	CDS	71864	74144	0.95	-	0	transcript_id "g86.t1"; gene_id "g86";
NODE_1814_length_170255_cov_32.992733	AUGUSTUS	CDS	74217	74401	0.9	-	2	transcript_id "g86.t1"; gene_id "g86";
NODE_1814_length_170255_cov_32.992733	AUGUSTUS	CDS	74549	74633	1	-	0	transcript_id "g86.t1"; gene_id "g86";
NODE_1814_length_170255_cov_32.992733	AUGUSTUS	start_codon	74631	74633	.	-	0	transcript_id "g86.t1"; gene_id "g86";
NODE_1814_length_170255_cov_32.992733	AUGUSTUS	gene	76159	77222	0.76	+	.	g87
NODE_1814_length_170255_cov_32.992733	AUGUSTUS	transcript	76159	77222	0.76	+	.	g87.t1
NODE_1814_length_170255_cov_32.992733	AUGUSTUS	start_codon	76159	76161	.	+	0	transcript_id "g87.t1"; gene_id "g87";
NODE_1814_length_170255_cov_32.992733	AUGUSTUS	intron	76219	76285	0.97	+	.	transcript_id "g87.t1"; gene_id "g87";
NODE_1814_length_170255_cov_32.992733	AUGUSTUS	intron	76685	76754	0.98	+	.	transcript_id "g87.t1"; gene_id "g87";
NODE_1814_length_170255_cov_32.992733	AUGUSTUS	intron	77007	77105	0.8	+	.	transcript_id "g87.t1"; gene_id "g87";
NODE_1814_length_170255_cov_32.992733	AUGUSTUS	CDS	76159	76218	0.97	+	0	transcript_id "g87.t1"; gene_id "g87";
NODE_1814_length_170255_cov_32.992733	AUGUSTUS	CDS	76286	76684	0.97	+	0	transcript_id "g87.t1"; gene_id "g87";
NODE_1814_length_170255_cov_32.992733	AUGUSTUS	CDS	76755	77006	0.79	+	0	transcript_id "g87.t1"; gene_id "g87";
NODE_1814_length_170255_cov_32.992733	AUGUSTUS	CDS	77106	77222	0.8	+	0	transcript_id "g87.t1"; gene_id "g87";
NODE_1814_length_170255_cov_32.992733	AUGUSTUS	stop_codon	77220	77222	.	+	0	transcript_id "g87.t1"; gene_id "g87";
NODE_1814_length_170255_cov_32.992733	AUGUSTUS	gene	78416	79384	0.62	-	.	g88
NODE_1814_length_170255_cov_32.992733	AUGUSTUS	transcript	78416	79384	0.62	-	.	g88.t1
NODE_1814_length_170255_cov_32.992733	AUGUSTUS	stop_codon	78416	78418	.	-	0	transcript_id "g88.t1"; gene_id "g88";
NODE_1814_length_170255_cov_32.992733	AUGUSTUS	CDS	78416	79384	0.62	-	0	transcript_id "g88.t1"; gene_id "g88";
NODE_1814_length_170255_cov_32.992733	AUGUSTUS	start_codon	79382	79384	.	-	0	transcript_id "g88.t1"; gene_id "g88";
NODE_1814_length_170255_cov_32.992733	AUGUSTUS	gene	81152	83159	0.24	-	.	g89
NODE_1814_length_170255_cov_32.992733	AUGUSTUS	transcript	81152	83159	0.24	-	.	g89.t1
NODE_1814_length_170255_cov_32.992733	AUGUSTUS	stop_codon	81152	81154	.	-	0	transcript_id "g89.t1"; gene_id "g89";
NODE_1814_length_170255_cov_32.992733	AUGUSTUS	intron	81576	81649	1	-	.	transcript_id "g89.t1"; gene_id "g89";
NODE_1814_length_170255_cov_32.992733	AUGUSTUS	intron	82175	82249	1	-	.	transcript_id "g89.t1"; gene_id "g89";
NODE_1814_length_170255_cov_32.992733	AUGUSTUS	intron	82637	83124	0.24	-	.	transcript_id "g89.t1"; gene_id "g89";
NODE_1814_length_170255_cov_32.992733	AUGUSTUS	CDS	81152	81575	1	-	1	transcript_id "g89.t1"; gene_id "g89";
NODE_1814_length_170255_cov_32.992733	AUGUSTUS	CDS	81650	82174	1	-	1	transcript_id "g89.t1"; gene_id "g89";
NODE_1814_length_170255_cov_32.992733	AUGUSTUS	CDS	82250	82636	1	-	1	transcript_id "g89.t1"; gene_id "g89";
NODE_1814_length_170255_cov_32.992733	AUGUSTUS	CDS	83125	83159	0.24	-	0	transcript_id "g89.t1"; gene_id "g89";
NODE_1814_length_170255_cov_32.992733	AUGUSTUS	start_codon	83157	83159	.	-	0	transcript_id "g89.t1"; gene_id "g89";
NODE_1814_length_170255_cov_32.992733	AUGUSTUS	gene	84425	86983	0.94	-	.	g90
NODE_1814_length_170255_cov_32.992733	AUGUSTUS	transcript	84425	86983	0.94	-	.	g90.t1
NODE_1814_length_170255_cov_32.992733	AUGUSTUS	stop_codon	84425	84427	.	-	0	transcript_id "g90.t1"; gene_id "g90";
NODE_1814_length_170255_cov_32.992733	AUGUSTUS	CDS	84425	86983	0.94	-	0	transcript_id "g90.t1"; gene_id "g90";
NODE_1814_length_170255_cov_32.992733	AUGUSTUS	start_codon	86981	86983	.	-	0	transcript_id "g90.t1"; gene_id "g90";
NODE_1814_length_170255_cov_32.992733	AUGUSTUS	gene	92992	93525	0.92	+	.	g91
NODE_1814_length_170255_cov_32.992733	AUGUSTUS	transcript	92992	93525	0.92	+	.	g91.t1
NODE_1814_length_170255_cov_32.992733	AUGUSTUS	start_codon	92992	92994	.	+	0	transcript_id "g91.t1"; gene_id "g91";
NODE_1814_length_170255_cov_32.992733	AUGUSTUS	CDS	92992	93525	0.92	+	0	transcript_id "g91.t1"; gene_id "g91";
NODE_1814_length_170255_cov_32.992733	AUGUSTUS	stop_codon	93523	93525	.	+	0	transcript_id "g91.t1"; gene_id "g91";
NODE_1814_length_170255_cov_32.992733	AUGUSTUS	gene	101320	125467	0.52	+	.	g92
NODE_1814_length_170255_cov_32.992733	AUGUSTUS	transcript	101320	125467	0.52	+	.	g92.t1
NODE_1814_length_170255_cov_32.992733	AUGUSTUS	start_codon	101320	101322	.	+	0	transcript_id "g92.t1"; gene_id "g92";
NODE_1814_length_170255_cov_32.992733	AUGUSTUS	intron	101616	103547	1	+	.	transcript_id "g92.t1"; gene_id "g92";
NODE_1814_length_170255_cov_32.992733	AUGUSTUS	intron	103667	104871	1	+	.	transcript_id "g92.t1"; gene_id "g92";
NODE_1814_length_170255_cov_32.992733	AUGUSTUS	intron	105122	125346	0.74	+	.	transcript_id "g92.t1"; gene_id "g92";
NODE_1814_length_170255_cov_32.992733	AUGUSTUS	CDS	101320	101615	0.7	+	0	transcript_id "g92.t1"; gene_id "g92";
NODE_1814_length_170255_cov_32.992733	AUGUSTUS	CDS	103548	103666	1	+	1	transcript_id "g92.t1"; gene_id "g92";
NODE_1814_length_170255_cov_32.992733	AUGUSTUS	CDS	104872	105121	1	+	2	transcript_id "g92.t1"; gene_id "g92";
NODE_1814_length_170255_cov_32.992733	AUGUSTUS	CDS	125347	125467	0.9	+	1	transcript_id "g92.t1"; gene_id "g92";
NODE_1814_length_170255_cov_32.992733	AUGUSTUS	stop_codon	125465	125467	.	+	0	transcript_id "g92.t1"; gene_id "g92";
NODE_1814_length_170255_cov_32.992733	AUGUSTUS	gene	130852	141712	0.51	+	.	g93
NODE_1814_length_170255_cov_32.992733	AUGUSTUS	transcript	130852	141712	0.51	+	.	g93.t1
NODE_1814_length_170255_cov_32.992733	AUGUSTUS	start_codon	130852	130854	.	+	0	transcript_id "g93.t1"; gene_id "g93";
NODE_1814_length_170255_cov_32.992733	AUGUSTUS	intron	130935	134044	0.72	+	.	transcript_id "g93.t1"; gene_id "g93";
NODE_1814_length_170255_cov_32.992733	AUGUSTUS	intron	134184	141460	0.67	+	.	transcript_id "g93.t1"; gene_id "g93";
NODE_1814_length_170255_cov_32.992733	AUGUSTUS	CDS	130852	130934	0.76	+	0	transcript_id "g93.t1"; gene_id "g93";
NODE_1814_length_170255_cov_32.992733	AUGUSTUS	CDS	134045	134183	0.72	+	1	transcript_id "g93.t1"; gene_id "g93";
NODE_1814_length_170255_cov_32.992733	AUGUSTUS	CDS	141461	141712	0.89	+	0	transcript_id "g93.t1"; gene_id "g93";
NODE_1814_length_170255_cov_32.992733	AUGUSTUS	stop_codon	141710	141712	.	+	0	transcript_id "g93.t1"; gene_id "g93";
NODE_1814_length_170255_cov_32.992733	AUGUSTUS	gene	148049	148921	0.56	-	.	g94
NODE_1814_length_170255_cov_32.992733	AUGUSTUS	transcript	148049	148921	0.56	-	.	g94.t1
NODE_1814_length_170255_cov_32.992733	AUGUSTUS	stop_codon	148049	148051	.	-	0	transcript_id "g94.t1"; gene_id "g94";
NODE_1814_length_170255_cov_32.992733	AUGUSTUS	intron	148248	148337	0.84	-	.	transcript_id "g94.t1"; gene_id "g94";
NODE_1814_length_170255_cov_32.992733	AUGUSTUS	intron	148501	148785	0.57	-	.	transcript_id "g94.t1"; gene_id "g94";
NODE_1814_length_170255_cov_32.992733	AUGUSTUS	CDS	148049	148247	0.84	-	1	transcript_id "g94.t1"; gene_id "g94";
NODE_1814_length_170255_cov_32.992733	AUGUSTUS	CDS	148338	148500	0.63	-	2	transcript_id "g94.t1"; gene_id "g94";
NODE_1814_length_170255_cov_32.992733	AUGUSTUS	CDS	148786	148921	0.66	-	0	transcript_id "g94.t1"; gene_id "g94";
NODE_1814_length_170255_cov_32.992733	AUGUSTUS	start_codon	148919	148921	.	-	0	transcript_id "g94.t1"; gene_id "g94";
NODE_1814_length_170255_cov_32.992733	AUGUSTUS	gene	148997	160131	0.17	+	.	g95
NODE_1814_length_170255_cov_32.992733	AUGUSTUS	transcript	148997	160131	0.17	+	.	g95.t1
NODE_1814_length_170255_cov_32.992733	AUGUSTUS	start_codon	148997	148999	.	+	0	transcript_id "g95.t1"; gene_id "g95";
NODE_1814_length_170255_cov_32.992733	AUGUSTUS	intron	149026	157293	0.38	+	.	transcript_id "g95.t1"; gene_id "g95";
NODE_1814_length_170255_cov_32.992733	AUGUSTUS	intron	157578	158169	1	+	.	transcript_id "g95.t1"; gene_id "g95";
NODE_1814_length_170255_cov_32.992733	AUGUSTUS	intron	159062	159968	0.52	+	.	transcript_id "g95.t1"; gene_id "g95";
NODE_1814_length_170255_cov_32.992733	AUGUSTUS	CDS	148997	149025	0.38	+	0	transcript_id "g95.t1"; gene_id "g95";
NODE_1814_length_170255_cov_32.992733	AUGUSTUS	CDS	157294	157577	1	+	1	transcript_id "g95.t1"; gene_id "g95";
NODE_1814_length_170255_cov_32.992733	AUGUSTUS	CDS	158170	159061	0.59	+	2	transcript_id "g95.t1"; gene_id "g95";
NODE_1814_length_170255_cov_32.992733	AUGUSTUS	CDS	159969	160131	0.52	+	1	transcript_id "g95.t1"; gene_id "g95";
NODE_1814_length_170255_cov_32.992733	AUGUSTUS	stop_codon	160129	160131	.	+	0	transcript_id "g95.t1"; gene_id "g95";
NODE_1909_length_88988_cov_29.694992	AUGUSTUS	gene	2800	20133	0.29	-	.	g96
NODE_1909_length_88988_cov_29.694992	AUGUSTUS	transcript	2800	20133	0.29	-	.	g96.t1
NODE_1909_length_88988_cov_29.694992	AUGUSTUS	stop_codon	2800	2802	.	-	0	transcript_id "g96.t1"; gene_id "g96";
NODE_1909_length_88988_cov_29.694992	AUGUSTUS	intron	3084	19547	0.29	-	.	transcript_id "g96.t1"; gene_id "g96";
NODE_1909_length_88988_cov_29.694992	AUGUSTUS	CDS	2800	3083	0.3	-	2	transcript_id "g96.t1"; gene_id "g96";
NODE_1909_length_88988_cov_29.694992	AUGUSTUS	CDS	19548	20133	0.43	-	0	transcript_id "g96.t1"; gene_id "g96";
NODE_1909_length_88988_cov_29.694992	AUGUSTUS	start_codon	20131	20133	.	-	0	transcript_id "g96.t1"; gene_id "g96";
NODE_1909_length_88988_cov_29.694992	AUGUSTUS	gene	37622	42083	0.76	+	.	g97
NODE_1909_length_88988_cov_29.694992	AUGUSTUS	transcript	37622	42083	0.76	+	.	g97.t1
NODE_1909_length_88988_cov_29.694992	AUGUSTUS	start_codon	37622	37624	.	+	0	transcript_id "g97.t1"; gene_id "g97";
NODE_1909_length_88988_cov_29.694992	AUGUSTUS	intron	37746	37949	1	+	.	transcript_id "g97.t1"; gene_id "g97";
NODE_1909_length_88988_cov_29.694992	AUGUSTUS	intron	38397	40991	0.94	+	.	transcript_id "g97.t1"; gene_id "g97";
NODE_1909_length_88988_cov_29.694992	AUGUSTUS	intron	41743	41827	1	+	.	transcript_id "g97.t1"; gene_id "g97";
NODE_1909_length_88988_cov_29.694992	AUGUSTUS	CDS	37622	37745	0.96	+	0	transcript_id "g97.t1"; gene_id "g97";
NODE_1909_length_88988_cov_29.694992	AUGUSTUS	CDS	37950	38396	0.97	+	2	transcript_id "g97.t1"; gene_id "g97";
NODE_1909_length_88988_cov_29.694992	AUGUSTUS	CDS	40992	41742	1	+	2	transcript_id "g97.t1"; gene_id "g97";
NODE_1909_length_88988_cov_29.694992	AUGUSTUS	CDS	41828	42083	0.83	+	1	transcript_id "g97.t1"; gene_id "g97";
NODE_1909_length_88988_cov_29.694992	AUGUSTUS	stop_codon	42081	42083	.	+	0	transcript_id "g97.t1"; gene_id "g97";
NODE_1909_length_88988_cov_29.694992	AUGUSTUS	gene	86159	86509	0.99	-	.	g98
NODE_1909_length_88988_cov_29.694992	AUGUSTUS	transcript	86159	86509	0.99	-	.	g98.t1
NODE_1909_length_88988_cov_29.694992	AUGUSTUS	stop_codon	86159	86161	.	-	0	transcript_id "g98.t1"; gene_id "g98";
NODE_1909_length_88988_cov_29.694992	AUGUSTUS	CDS	86159	86509	0.99	-	0	transcript_id "g98.t1"; gene_id "g98";
NODE_1909_length_88988_cov_29.694992	AUGUSTUS	start_codon	86507	86509	.	-	0	transcript_id "g98.t1"; gene_id "g98";
NODE_1982_length_304_cov_299.539459	AUGUSTUS	gene	262	388	0.63	-	.	g99
NODE_1982_length_304_cov_299.539459	AUGUSTUS	transcript	262	388	0.63	-	.	g99.t1
NODE_1982_length_304_cov_299.539459	AUGUSTUS	stop_codon	262	264	.	-	0	transcript_id "g99.t1"; gene_id "g99";
NODE_1982_length_304_cov_299.539459	AUGUSTUS	CDS	262	388	0.63	-	1	transcript_id "g99.t1"; gene_id "g99";
NODE_1983_length_163_cov_527.361938	AUGUSTUS	gene	1	247	0.98	+	.	g100
NODE_1983_length_163_cov_527.361938	AUGUSTUS	transcript	1	247	0.98	+	.	g100.t1
NODE_1983_length_163_cov_527.361938	AUGUSTUS	CDS	1	247	0.98	+	2	transcript_id "g100.t1"; gene_id "g100";
NODE_1987_length_43979_cov_29.171581	AUGUSTUS	gene	1361	34007	0.22	+	.	g101
NODE_1987_length_43979_cov_29.171581	AUGUSTUS	transcript	1361	34007	0.22	+	.	g101.t1
NODE_1987_length_43979_cov_29.171581	AUGUSTUS	start_codon	1361	1363	.	+	0	transcript_id "g101.t1"; gene_id "g101";
NODE_1987_length_43979_cov_29.171581	AUGUSTUS	intron	1413	4055	0.53	+	.	transcript_id "g101.t1"; gene_id "g101";
NODE_1987_length_43979_cov_29.171581	AUGUSTUS	intron	4263	4355	1	+	.	transcript_id "g101.t1"; gene_id "g101";
NODE_1987_length_43979_cov_29.171581	AUGUSTUS	intron	4502	5004	1	+	.	transcript_id "g101.t1"; gene_id "g101";
NODE_1987_length_43979_cov_29.171581	AUGUSTUS	intron	5156	5575	0.95	+	.	transcript_id "g101.t1"; gene_id "g101";
NODE_1987_length_43979_cov_29.171581	AUGUSTUS	intron	5707	9293	0.86	+	.	transcript_id "g101.t1"; gene_id "g101";
NODE_1987_length_43979_cov_29.171581	AUGUSTUS	intron	9454	14693	1	+	.	transcript_id "g101.t1"; gene_id "g101";
NODE_1987_length_43979_cov_29.171581	AUGUSTUS	intron	14928	15135	1	+	.	transcript_id "g101.t1"; gene_id "g101";
NODE_1987_length_43979_cov_29.171581	AUGUSTUS	intron	15259	15961	1	+	.	transcript_id "g101.t1"; gene_id "g101";
NODE_1987_length_43979_cov_29.171581	AUGUSTUS	intron	16671	16782	0.68	+	.	transcript_id "g101.t1"; gene_id "g101";
NODE_1987_length_43979_cov_29.171581	AUGUSTUS	intron	17319	18157	0.89	+	.	transcript_id "g101.t1"; gene_id "g101";
NODE_1987_length_43979_cov_29.171581	AUGUSTUS	intron	18284	32944	0.9	+	.	transcript_id "g101.t1"; gene_id "g101";
NODE_1987_length_43979_cov_29.171581	AUGUSTUS	intron	33104	33177	1	+	.	transcript_id "g101.t1"; gene_id "g101";
NODE_1987_length_43979_cov_29.171581	AUGUSTUS	CDS	1361	1412	0.55	+	0	transcript_id "g101.t1"; gene_id "g101";
NODE_1987_length_43979_cov_29.171581	AUGUSTUS	CDS	4056	4262	1	+	2	transcript_id "g101.t1"; gene_id "g101";
NODE_1987_length_43979_cov_29.171581	AUGUSTUS	CDS	4356	4501	1	+	2	transcript_id "g101.t1"; gene_id "g101";
NODE_1987_length_43979_cov_29.171581	AUGUSTUS	CDS	5005	5155	1	+	0	transcript_id "g101.t1"; gene_id "g101";
NODE_1987_length_43979_cov_29.171581	AUGUSTUS	CDS	5576	5706	0.95	+	2	transcript_id "g101.t1"; gene_id "g101";
NODE_1987_length_43979_cov_29.171581	AUGUSTUS	CDS	9294	9453	0.88	+	0	transcript_id "g101.t1"; gene_id "g101";
NODE_1987_length_43979_cov_29.171581	AUGUSTUS	CDS	14694	14927	1	+	2	transcript_id "g101.t1"; gene_id "g101";
NODE_1987_length_43979_cov_29.171581	AUGUSTUS	CDS	15136	15258	1	+	2	transcript_id "g101.t1"; gene_id "g101";
NODE_1987_length_43979_cov_29.171581	AUGUSTUS	CDS	15962	16670	1	+	2	transcript_id "g101.t1"; gene_id "g101";
NODE_1987_length_43979_cov_29.171581	AUGUSTUS	CDS	16783	17318	0.64	+	1	transcript_id "g101.t1"; gene_id "g101";
NODE_1987_length_43979_cov_29.171581	AUGUSTUS	CDS	18158	18283	0.89	+	2	transcript_id "g101.t1"; gene_id "g101";
NODE_1987_length_43979_cov_29.171581	AUGUSTUS	CDS	32945	33103	1	+	2	transcript_id "g101.t1"; gene_id "g101";
NODE_1987_length_43979_cov_29.171581	AUGUSTUS	CDS	33178	34007	0.94	+	2	transcript_id "g101.t1"; gene_id "g101";
NODE_1987_length_43979_cov_29.171581	AUGUSTUS	stop_codon	34005	34007	.	+	0	transcript_id "g101.t1"; gene_id "g101";
NODE_1987_length_43979_cov_29.171581	AUGUSTUS	gene	42067	42443	0.63	+	.	g102
NODE_1987_length_43979_cov_29.171581	AUGUSTUS	transcript	42067	42443	0.63	+	.	g102.t1
NODE_1987_length_43979_cov_29.171581	AUGUSTUS	start_codon	42067	42069	.	+	0	transcript_id "g102.t1"; gene_id "g102";
NODE_1987_length_43979_cov_29.171581	AUGUSTUS	intron	42081	42217	0.64	+	.	transcript_id "g102.t1"; gene_id "g102";
NODE_1987_length_43979_cov_29.171581	AUGUSTUS	CDS	42067	42080	0.63	+	0	transcript_id "g102.t1"; gene_id "g102";
NODE_1987_length_43979_cov_29.171581	AUGUSTUS	CDS	42218	42443	0.71	+	1	transcript_id "g102.t1"; gene_id "g102";
NODE_1987_length_43979_cov_29.171581	AUGUSTUS	stop_codon	42441	42443	.	+	0	transcript_id "g102.t1"; gene_id "g102";
NODE_2039_length_85_cov_110.823532	AUGUSTUS	gene	1	169	0.98	+	.	g103
NODE_2039_length_85_cov_110.823532	AUGUSTUS	transcript	1	169	0.98	+	.	g103.t1
NODE_2039_length_85_cov_110.823532	AUGUSTUS	CDS	1	169	0.98	+	2	transcript_id "g103.t1"; gene_id "g103";
NODE_2074_length_523_cov_90.673042	AUGUSTUS	gene	23	607	0.74	+	.	g104
NODE_2074_length_523_cov_90.673042	AUGUSTUS	transcript	23	607	0.74	+	.	g104.t1
NODE_2074_length_523_cov_90.673042	AUGUSTUS	start_codon	23	25	.	+	0	transcript_id "g104.t1"; gene_id "g104";
NODE_2074_length_523_cov_90.673042	AUGUSTUS	CDS	23	607	0.74	+	0	transcript_id "g104.t1"; gene_id "g104";
NODE_2088_length_791_cov_16.242731	AUGUSTUS	gene	1	688	0.21	-	.	g105
NODE_2088_length_791_cov_16.242731	AUGUSTUS	transcript	1	688	0.21	-	.	g105.t1
NODE_2088_length_791_cov_16.242731	AUGUSTUS	intron	1	129	0.45	-	.	transcript_id "g105.t1"; gene_id "g105";
NODE_2088_length_791_cov_16.242731	AUGUSTUS	intron	590	670	0.5	-	.	transcript_id "g105.t1"; gene_id "g105";
NODE_2088_length_791_cov_16.242731	AUGUSTUS	CDS	130	589	0.21	-	0	transcript_id "g105.t1"; gene_id "g105";
NODE_2088_length_791_cov_16.242731	AUGUSTUS	CDS	671	688	0.54	-	0	transcript_id "g105.t1"; gene_id "g105";
NODE_2088_length_791_cov_16.242731	AUGUSTUS	start_codon	686	688	.	-	0	transcript_id "g105.t1"; gene_id "g105";
NODE_2090_length_43986_cov_33.596123	AUGUSTUS	gene	786	2523	0.96	-	.	g106
NODE_2090_length_43986_cov_33.596123	AUGUSTUS	transcript	786	2523	0.96	-	.	g106.t1
NODE_2090_length_43986_cov_33.596123	AUGUSTUS	stop_codon	786	788	.	-	0	transcript_id "g106.t1"; gene_id "g106";
NODE_2090_length_43986_cov_33.596123	AUGUSTUS	intron	2376	2493	1	-	.	transcript_id "g106.t1"; gene_id "g106";
NODE_2090_length_43986_cov_33.596123	AUGUSTUS	CDS	786	2375	0.96	-	0	transcript_id "g106.t1"; gene_id "g106";
NODE_2090_length_43986_cov_33.596123	AUGUSTUS	CDS	2494	2523	1	-	0	transcript_id "g106.t1"; gene_id "g106";
NODE_2090_length_43986_cov_33.596123	AUGUSTUS	start_codon	2521	2523	.	-	0	transcript_id "g106.t1"; gene_id "g106";
NODE_2090_length_43986_cov_33.596123	AUGUSTUS	gene	3571	4956	0.62	+	.	g107
NODE_2090_length_43986_cov_33.596123	AUGUSTUS	transcript	3571	4956	0.62	+	.	g107.t1
NODE_2090_length_43986_cov_33.596123	AUGUSTUS	start_codon	3571	3573	.	+	0	transcript_id "g107.t1"; gene_id "g107";
NODE_2090_length_43986_cov_33.596123	AUGUSTUS	CDS	3571	4956	0.62	+	0	transcript_id "g107.t1"; gene_id "g107";
NODE_2090_length_43986_cov_33.596123	AUGUSTUS	stop_codon	4954	4956	.	+	0	transcript_id "g107.t1"; gene_id "g107";
NODE_2090_length_43986_cov_33.596123	AUGUSTUS	gene	6225	8292	0.97	-	.	g108
NODE_2090_length_43986_cov_33.596123	AUGUSTUS	transcript	6225	8292	0.97	-	.	g108.t1
NODE_2090_length_43986_cov_33.596123	AUGUSTUS	stop_codon	6225	6227	.	-	0	transcript_id "g108.t1"; gene_id "g108";
NODE_2090_length_43986_cov_33.596123	AUGUSTUS	intron	6887	6962	1	-	.	transcript_id "g108.t1"; gene_id "g108";
NODE_2090_length_43986_cov_33.596123	AUGUSTUS	intron	7156	8202	0.97	-	.	transcript_id "g108.t1"; gene_id "g108";
NODE_2090_length_43986_cov_33.596123	AUGUSTUS	CDS	6225	6886	1	-	2	transcript_id "g108.t1"; gene_id "g108";
NODE_2090_length_43986_cov_33.596123	AUGUSTUS	CDS	6963	7155	1	-	0	transcript_id "g108.t1"; gene_id "g108";
NODE_2090_length_43986_cov_33.596123	AUGUSTUS	CDS	8203	8292	0.97	-	0	transcript_id "g108.t1"; gene_id "g108";
NODE_2090_length_43986_cov_33.596123	AUGUSTUS	start_codon	8290	8292	.	-	0	transcript_id "g108.t1"; gene_id "g108";
NODE_2090_length_43986_cov_33.596123	AUGUSTUS	gene	10874	30070	0.09	-	.	g109
NODE_2090_length_43986_cov_33.596123	AUGUSTUS	transcript	10874	30070	0.09	-	.	g109.t1
NODE_2090_length_43986_cov_33.596123	AUGUSTUS	stop_codon	10874	10876	.	-	0	transcript_id "g109.t1"; gene_id "g109";
NODE_2090_length_43986_cov_33.596123	AUGUSTUS	intron	11176	11261	0.55	-	.	transcript_id "g109.t1"; gene_id "g109";
NODE_2090_length_43986_cov_33.596123	AUGUSTUS	intron	11347	11436	0.48	-	.	transcript_id "g109.t1"; gene_id "g109";
NODE_2090_length_43986_cov_33.596123	AUGUSTUS	intron	11633	11732	1	-	.	transcript_id "g109.t1"; gene_id "g109";
NODE_2090_length_43986_cov_33.596123	AUGUSTUS	intron	11901	11967	1	-	.	transcript_id "g109.t1"; gene_id "g109";
NODE_2090_length_43986_cov_33.596123	AUGUSTUS	intron	12205	12284	1	-	.	transcript_id "g109.t1"; gene_id "g109";
NODE_2090_length_43986_cov_33.596123	AUGUSTUS	intron	12752	13181	0.59	-	.	transcript_id "g109.t1"; gene_id "g109";
NODE_2090_length_43986_cov_33.596123	AUGUSTUS	intron	13835	13910	0.99	-	.	transcript_id "g109.t1"; gene_id "g109";
NODE_2090_length_43986_cov_33.596123	AUGUSTUS	intron	14374	20474	0.91	-	.	transcript_id "g109.t1"; gene_id "g109";
NODE_2090_length_43986_cov_33.596123	AUGUSTUS	intron	20666	20758	1	-	.	transcript_id "g109.t1"; gene_id "g109";
NODE_2090_length_43986_cov_33.596123	AUGUSTUS	intron	22170	22259	1	-	.	transcript_id "g109.t1"; gene_id "g109";
NODE_2090_length_43986_cov_33.596123	AUGUSTUS	intron	22511	23025	0.5	-	.	transcript_id "g109.t1"; gene_id "g109";
NODE_2090_length_43986_cov_33.596123	AUGUSTUS	intron	23302	23396	1	-	.	transcript_id "g109.t1"; gene_id "g109";
NODE_2090_length_43986_cov_33.596123	AUGUSTUS	intron	23793	23896	0.83	-	.	transcript_id "g109.t1"; gene_id "g109";
NODE_2090_length_43986_cov_33.596123	AUGUSTUS	intron	28439	29733	0.99	-	.	transcript_id "g109.t1"; gene_id "g109";
NODE_2090_length_43986_cov_33.596123	AUGUSTUS	CDS	10874	11175	0.97	-	2	transcript_id "g109.t1"; gene_id "g109";
NODE_2090_length_43986_cov_33.596123	AUGUSTUS	CDS	11262	11346	0.47	-	0	transcript_id "g109.t1"; gene_id "g109";
NODE_2090_length_43986_cov_33.596123	AUGUSTUS	CDS	11437	11632	0.58	-	1	transcript_id "g109.t1"; gene_id "g109";
NODE_2090_length_43986_cov_33.596123	AUGUSTUS	CDS	11733	11900	1	-	1	transcript_id "g109.t1"; gene_id "g109";
NODE_2090_length_43986_cov_33.596123	AUGUSTUS	CDS	11968	12204	1	-	1	transcript_id "g109.t1"; gene_id "g109";
NODE_2090_length_43986_cov_33.596123	AUGUSTUS	CDS	12285	12751	0.59	-	0	transcript_id "g109.t1"; gene_id "g109";
NODE_2090_length_43986_cov_33.596123	AUGUSTUS	CDS	13182	13834	1	-	2	transcript_id "g109.t1"; gene_id "g109";
NODE_2090_length_43986_cov_33.596123	AUGUSTUS	CDS	13911	14373	0.9	-	0	transcript_id "g109.t1"; gene_id "g109";
NODE_2090_length_43986_cov_33.596123	AUGUSTUS	CDS	20475	20665	1	-	2	transcript_id "g109.t1"; gene_id "g109";
NODE_2090_length_43986_cov_33.596123	AUGUSTUS	CDS	20759	22169	1	-	0	transcript_id "g109.t1"; gene_id "g109";
NODE_2090_length_43986_cov_33.596123	AUGUSTUS	CDS	22260	22510	0.5	-	2	transcript_id "g109.t1"; gene_id "g109";
NODE_2090_length_43986_cov_33.596123	AUGUSTUS	CDS	23026	23301	1	-	2	transcript_id "g109.t1"; gene_id "g109";
NODE_2090_length_43986_cov_33.596123	AUGUSTUS	CDS	23397	23792	0.83	-	2	transcript_id "g109.t1"; gene_id "g109";
NODE_2090_length_43986_cov_33.596123	AUGUSTUS	CDS	23897	28438	1	-	2	transcript_id "g109.t1"; gene_id "g109";
NODE_2090_length_43986_cov_33.596123	AUGUSTUS	CDS	29734	30070	0.99	-	0	transcript_id "g109.t1"; gene_id "g109";
NODE_2090_length_43986_cov_33.596123	AUGUSTUS	start_codon	30068	30070	.	-	0	transcript_id "g109.t1"; gene_id "g109";
NODE_2090_length_43986_cov_33.596123	AUGUSTUS	gene	32575	34312	0.46	+	.	g110
NODE_2090_length_43986_cov_33.596123	AUGUSTUS	transcript	32575	34312	0.46	+	.	g110.t1
NODE_2090_length_43986_cov_33.596123	AUGUSTUS	start_codon	32575	32577	.	+	0	transcript_id "g110.t1"; gene_id "g110";
NODE_2090_length_43986_cov_33.596123	AUGUSTUS	intron	32639	32717	0.88	+	.	transcript_id "g110.t1"; gene_id "g110";
NODE_2090_length_43986_cov_33.596123	AUGUSTUS	intron	33236	33368	0.51	+	.	transcript_id "g110.t1"; gene_id "g110";
NODE_2090_length_43986_cov_33.596123	AUGUSTUS	intron	33579	33664	0.71	+	.	transcript_id "g110.t1"; gene_id "g110";
NODE_2090_length_43986_cov_33.596123	AUGUSTUS	CDS	32575	32638	0.87	+	0	transcript_id "g110.t1"; gene_id "g110";
NODE_2090_length_43986_cov_33.596123	AUGUSTUS	CDS	32718	33235	1	+	2	transcript_id "g110.t1"; gene_id "g110";
NODE_2090_length_43986_cov_33.596123	AUGUSTUS	CDS	33369	33578	0.51	+	0	transcript_id "g110.t1"; gene_id "g110";
NODE_2090_length_43986_cov_33.596123	AUGUSTUS	CDS	33665	34312	1	+	0	transcript_id "g110.t1"; gene_id "g110";
NODE_2090_length_43986_cov_33.596123	AUGUSTUS	stop_codon	34310	34312	.	+	0	transcript_id "g110.t1"; gene_id "g110";
NODE_2090_length_43986_cov_33.596123	AUGUSTUS	gene	35684	38236	0.46	-	.	g111
NODE_2090_length_43986_cov_33.596123	AUGUSTUS	transcript	35684	38236	0.46	-	.	g111.t1
NODE_2090_length_43986_cov_33.596123	AUGUSTUS	stop_codon	35684	35686	.	-	0	transcript_id "g111.t1"; gene_id "g111";
NODE_2090_length_43986_cov_33.596123	AUGUSTUS	intron	35730	35808	0.97	-	.	transcript_id "g111.t1"; gene_id "g111";
NODE_2090_length_43986_cov_33.596123	AUGUSTUS	intron	35967	36040	1	-	.	transcript_id "g111.t1"; gene_id "g111";
NODE_2090_length_43986_cov_33.596123	AUGUSTUS	intron	36185	36248	1	-	.	transcript_id "g111.t1"; gene_id "g111";
NODE_2090_length_43986_cov_33.596123	AUGUSTUS	intron	36432	37040	0.91	-	.	transcript_id "g111.t1"; gene_id "g111";
NODE_2090_length_43986_cov_33.596123	AUGUSTUS	intron	37727	37797	1	-	.	transcript_id "g111.t1"; gene_id "g111";
NODE_2090_length_43986_cov_33.596123	AUGUSTUS	CDS	35684	35729	0.97	-	1	transcript_id "g111.t1"; gene_id "g111";
NODE_2090_length_43986_cov_33.596123	AUGUSTUS	CDS	35809	35966	0.97	-	0	transcript_id "g111.t1"; gene_id "g111";
NODE_2090_length_43986_cov_33.596123	AUGUSTUS	CDS	36041	36184	1	-	0	transcript_id "g111.t1"; gene_id "g111";
NODE_2090_length_43986_cov_33.596123	AUGUSTUS	CDS	36249	36431	1	-	0	transcript_id "g111.t1"; gene_id "g111";
NODE_2090_length_43986_cov_33.596123	AUGUSTUS	CDS	37041	37726	0.97	-	2	transcript_id "g111.t1"; gene_id "g111";
NODE_2090_length_43986_cov_33.596123	AUGUSTUS	CDS	37798	38236	0.49	-	0	transcript_id "g111.t1"; gene_id "g111";
NODE_2090_length_43986_cov_33.596123	AUGUSTUS	start_codon	38234	38236	.	-	0	transcript_id "g111.t1"; gene_id "g111";
NODE_2090_length_43986_cov_33.596123	AUGUSTUS	gene	39389	40538	0.96	+	.	g112
NODE_2090_length_43986_cov_33.596123	AUGUSTUS	transcript	39389	40538	0.96	+	.	g112.t1
NODE_2090_length_43986_cov_33.596123	AUGUSTUS	start_codon	39389	39391	.	+	0	transcript_id "g112.t1"; gene_id "g112";
NODE_2090_length_43986_cov_33.596123	AUGUSTUS	intron	39491	39572	0.96	+	.	transcript_id "g112.t1"; gene_id "g112";
NODE_2090_length_43986_cov_33.596123	AUGUSTUS	intron	39848	39917	1	+	.	transcript_id "g112.t1"; gene_id "g112";
NODE_2090_length_43986_cov_33.596123	AUGUSTUS	intron	40084	40163	1	+	.	transcript_id "g112.t1"; gene_id "g112";
NODE_2090_length_43986_cov_33.596123	AUGUSTUS	CDS	39389	39490	0.98	+	0	transcript_id "g112.t1"; gene_id "g112";
NODE_2090_length_43986_cov_33.596123	AUGUSTUS	CDS	39573	39847	0.97	+	0	transcript_id "g112.t1"; gene_id "g112";
NODE_2090_length_43986_cov_33.596123	AUGUSTUS	CDS	39918	40083	1	+	1	transcript_id "g112.t1"; gene_id "g112";
NODE_2090_length_43986_cov_33.596123	AUGUSTUS	CDS	40164	40538	1	+	0	transcript_id "g112.t1"; gene_id "g112";
NODE_2090_length_43986_cov_33.596123	AUGUSTUS	stop_codon	40536	40538	.	+	0	transcript_id "g112.t1"; gene_id "g112";
NODE_2090_length_43986_cov_33.596123	AUGUSTUS	gene	41541	43502	0.96	-	.	g113
NODE_2090_length_43986_cov_33.596123	AUGUSTUS	transcript	41541	43502	0.96	-	.	g113.t1
NODE_2090_length_43986_cov_33.596123	AUGUSTUS	stop_codon	41541	41543	.	-	0	transcript_id "g113.t1"; gene_id "g113";
NODE_2090_length_43986_cov_33.596123	AUGUSTUS	CDS	41541	43502	0.96	-	0	transcript_id "g113.t1"; gene_id "g113";
NODE_2090_length_43986_cov_33.596123	AUGUSTUS	start_codon	43500	43502	.	-	0	transcript_id "g113.t1"; gene_id "g113";
NODE_2140_length_381_cov_43.091862	AUGUSTUS	gene	1	465	1	+	.	g114
NODE_2140_length_381_cov_43.091862	AUGUSTUS	transcript	1	465	1	+	.	g114.t1
NODE_2140_length_381_cov_43.091862	AUGUSTUS	intron	59	130	1	+	.	transcript_id "g114.t1"; gene_id "g114";
NODE_2140_length_381_cov_43.091862	AUGUSTUS	CDS	1	58	1	+	0	transcript_id "g114.t1"; gene_id "g114";
NODE_2140_length_381_cov_43.091862	AUGUSTUS	CDS	131	465	1	+	2	transcript_id "g114.t1"; gene_id "g114";
NODE_2148_length_43528_cov_25.253056	AUGUSTUS	gene	2265	3489	0.82	+	.	g115
NODE_2148_length_43528_cov_25.253056	AUGUSTUS	transcript	2265	3489	0.82	+	.	g115.t1
NODE_2148_length_43528_cov_25.253056	AUGUSTUS	start_codon	2265	2267	.	+	0	transcript_id "g115.t1"; gene_id "g115";
NODE_2148_length_43528_cov_25.253056	AUGUSTUS	intron	2447	2538	1	+	.	transcript_id "g115.t1"; gene_id "g115";
NODE_2148_length_43528_cov_25.253056	AUGUSTUS	intron	2936	3207	0.83	+	.	transcript_id "g115.t1"; gene_id "g115";
NODE_2148_length_43528_cov_25.253056	AUGUSTUS	CDS	2265	2446	0.99	+	0	transcript_id "g115.t1"; gene_id "g115";
NODE_2148_length_43528_cov_25.253056	AUGUSTUS	CDS	2539	2935	0.99	+	1	transcript_id "g115.t1"; gene_id "g115";
NODE_2148_length_43528_cov_25.253056	AUGUSTUS	CDS	3208	3489	0.84	+	0	transcript_id "g115.t1"; gene_id "g115";
NODE_2148_length_43528_cov_25.253056	AUGUSTUS	stop_codon	3487	3489	.	+	0	transcript_id "g115.t1"; gene_id "g115";
NODE_2148_length_43528_cov_25.253056	AUGUSTUS	gene	5583	16735	0.19	-	.	g116
NODE_2148_length_43528_cov_25.253056	AUGUSTUS	transcript	5583	16735	0.19	-	.	g116.t1
NODE_2148_length_43528_cov_25.253056	AUGUSTUS	stop_codon	5583	5585	.	-	0	transcript_id "g116.t1"; gene_id "g116";
NODE_2148_length_43528_cov_25.253056	AUGUSTUS	intron	5741	5820	1	-	.	transcript_id "g116.t1"; gene_id "g116";
NODE_2148_length_43528_cov_25.253056	AUGUSTUS	intron	6002	6078	0.65	-	.	transcript_id "g116.t1"; gene_id "g116";
NODE_2148_length_43528_cov_25.253056	AUGUSTUS	intron	6225	6304	1	-	.	transcript_id "g116.t1"; gene_id "g116";
NODE_2148_length_43528_cov_25.253056	AUGUSTUS	intron	6960	7030	0.68	-	.	transcript_id "g116.t1"; gene_id "g116";
NODE_2148_length_43528_cov_25.253056	AUGUSTUS	intron	7142	16408	0.3	-	.	transcript_id "g116.t1"; gene_id "g116";
NODE_2148_length_43528_cov_25.253056	AUGUSTUS	CDS	5583	5740	1	-	2	transcript_id "g116.t1"; gene_id "g116";
NODE_2148_length_43528_cov_25.253056	AUGUSTUS	CDS	5821	6001	0.97	-	0	transcript_id "g116.t1"; gene_id "g116";
NODE_2148_length_43528_cov_25.253056	AUGUSTUS	CDS	6079	6224	0.65	-	2	transcript_id "g116.t1"; gene_id "g116";
NODE_2148_length_43528_cov_25.253056	AUGUSTUS	CDS	6305	6959	0.68	-	0	transcript_id "g116.t1"; gene_id "g116";
NODE_2148_length_43528_cov_25.253056	AUGUSTUS	CDS	7031	7141	0.36	-	0	transcript_id "g116.t1"; gene_id "g116";
NODE_2148_length_43528_cov_25.253056	AUGUSTUS	CDS	16409	16735	0.7	-	0	transcript_id "g116.t1"; gene_id "g116";
NODE_2148_length_43528_cov_25.253056	AUGUSTUS	start_codon	16733	16735	.	-	0	transcript_id "g116.t1"; gene_id "g116";
NODE_2148_length_43528_cov_25.253056	AUGUSTUS	gene	26054	26836	0.79	-	.	g117
NODE_2148_length_43528_cov_25.253056	AUGUSTUS	transcript	26054	26836	0.79	-	.	g117.t1
NODE_2148_length_43528_cov_25.253056	AUGUSTUS	stop_codon	26054	26056	.	-	0	transcript_id "g117.t1"; gene_id "g117";
NODE_2148_length_43528_cov_25.253056	AUGUSTUS	intron	26727	26816	0.83	-	.	transcript_id "g117.t1"; gene_id "g117";
NODE_2148_length_43528_cov_25.253056	AUGUSTUS	CDS	26054	26726	0.84	-	1	transcript_id "g117.t1"; gene_id "g117";
NODE_2148_length_43528_cov_25.253056	AUGUSTUS	CDS	26817	26836	0.83	-	0	transcript_id "g117.t1"; gene_id "g117";
NODE_2148_length_43528_cov_25.253056	AUGUSTUS	start_codon	26834	26836	.	-	0	transcript_id "g117.t1"; gene_id "g117";
NODE_2148_length_43528_cov_25.253056	AUGUSTUS	gene	30629	34664	0.44	+	.	g118
NODE_2148_length_43528_cov_25.253056	AUGUSTUS	transcript	30629	34664	0.44	+	.	g118.t1
NODE_2148_length_43528_cov_25.253056	AUGUSTUS	start_codon	30629	30631	.	+	0	transcript_id "g118.t1"; gene_id "g118";
NODE_2148_length_43528_cov_25.253056	AUGUSTUS	intron	32039	32157	0.85	+	.	transcript_id "g118.t1"; gene_id "g118";
NODE_2148_length_43528_cov_25.253056	AUGUSTUS	intron	32728	32803	0.93	+	.	transcript_id "g118.t1"; gene_id "g118";
NODE_2148_length_43528_cov_25.253056	AUGUSTUS	intron	33353	33408	1	+	.	transcript_id "g118.t1"; gene_id "g118";
NODE_2148_length_43528_cov_25.253056	AUGUSTUS	intron	33475	33563	0.55	+	.	transcript_id "g118.t1"; gene_id "g118";
NODE_2148_length_43528_cov_25.253056	AUGUSTUS	CDS	30629	32038	0.85	+	0	transcript_id "g118.t1"; gene_id "g118";
NODE_2148_length_43528_cov_25.253056	AUGUSTUS	CDS	32158	32727	0.78	+	0	transcript_id "g118.t1"; gene_id "g118";
NODE_2148_length_43528_cov_25.253056	AUGUSTUS	CDS	32804	33352	0.93	+	0	transcript_id "g118.t1"; gene_id "g118";
NODE_2148_length_43528_cov_25.253056	AUGUSTUS	CDS	33409	33474	0.75	+	0	transcript_id "g118.t1"; gene_id "g118";
NODE_2148_length_43528_cov_25.253056	AUGUSTUS	CDS	33564	34664	0.69	+	0	transcript_id "g118.t1"; gene_id "g118";
NODE_2148_length_43528_cov_25.253056	AUGUSTUS	stop_codon	34662	34664	.	+	0	transcript_id "g118.t1"; gene_id "g118";
NODE_2148_length_43528_cov_25.253056	AUGUSTUS	gene	36859	38298	0.96	+	.	g119
NODE_2148_length_43528_cov_25.253056	AUGUSTUS	transcript	36859	38298	0.96	+	.	g119.t1
NODE_2148_length_43528_cov_25.253056	AUGUSTUS	start_codon	36859	36861	.	+	0	transcript_id "g119.t1"; gene_id "g119";
NODE_2148_length_43528_cov_25.253056	AUGUSTUS	intron	36926	37008	0.98	+	.	transcript_id "g119.t1"; gene_id "g119";
NODE_2148_length_43528_cov_25.253056	AUGUSTUS	intron	37674	37769	1	+	.	transcript_id "g119.t1"; gene_id "g119";
NODE_2148_length_43528_cov_25.253056	AUGUSTUS	intron	37855	38158	0.99	+	.	transcript_id "g119.t1"; gene_id "g119";
NODE_2148_length_43528_cov_25.253056	AUGUSTUS	CDS	36859	36925	0.99	+	0	transcript_id "g119.t1"; gene_id "g119";
NODE_2148_length_43528_cov_25.253056	AUGUSTUS	CDS	37009	37673	0.98	+	2	transcript_id "g119.t1"; gene_id "g119";
NODE_2148_length_43528_cov_25.253056	AUGUSTUS	CDS	37770	37854	1	+	0	transcript_id "g119.t1"; gene_id "g119";
NODE_2148_length_43528_cov_25.253056	AUGUSTUS	CDS	38159	38298	0.99	+	2	transcript_id "g119.t1"; gene_id "g119";
NODE_2148_length_43528_cov_25.253056	AUGUSTUS	stop_codon	38296	38298	.	+	0	transcript_id "g119.t1"; gene_id "g119";
NODE_2151_length_82389_cov_27.497274	AUGUSTUS	gene	3996	8382	0.18	+	.	g120
NODE_2151_length_82389_cov_27.497274	AUGUSTUS	transcript	3996	8382	0.18	+	.	g120.t1
NODE_2151_length_82389_cov_27.497274	AUGUSTUS	start_codon	3996	3998	.	+	0	transcript_id "g120.t1"; gene_id "g120";
NODE_2151_length_82389_cov_27.497274	AUGUSTUS	intron	4083	4141	0.67	+	.	transcript_id "g120.t1"; gene_id "g120";
NODE_2151_length_82389_cov_27.497274	AUGUSTUS	intron	4254	8314	0.38	+	.	transcript_id "g120.t1"; gene_id "g120";
NODE_2151_length_82389_cov_27.497274	AUGUSTUS	CDS	3996	4082	0.84	+	0	transcript_id "g120.t1"; gene_id "g120";
NODE_2151_length_82389_cov_27.497274	AUGUSTUS	CDS	4142	4253	0.39	+	0	transcript_id "g120.t1"; gene_id "g120";
NODE_2151_length_82389_cov_27.497274	AUGUSTUS	CDS	8315	8382	0.32	+	2	transcript_id "g120.t1"; gene_id "g120";
NODE_2151_length_82389_cov_27.497274	AUGUSTUS	stop_codon	8380	8382	.	+	0	transcript_id "g120.t1"; gene_id "g120";
NODE_2151_length_82389_cov_27.497274	AUGUSTUS	gene	17459	19921	0.99	-	.	g121
NODE_2151_length_82389_cov_27.497274	AUGUSTUS	transcript	17459	19921	0.99	-	.	g121.t1
NODE_2151_length_82389_cov_27.497274	AUGUSTUS	stop_codon	17459	17461	.	-	0	transcript_id "g121.t1"; gene_id "g121";
NODE_2151_length_82389_cov_27.497274	AUGUSTUS	CDS	17459	19921	0.99	-	0	transcript_id "g121.t1"; gene_id "g121";
NODE_2151_length_82389_cov_27.497274	AUGUSTUS	start_codon	19919	19921	.	-	0	transcript_id "g121.t1"; gene_id "g121";
NODE_2151_length_82389_cov_27.497274	AUGUSTUS	gene	33686	42520	0.49	-	.	g122
NODE_2151_length_82389_cov_27.497274	AUGUSTUS	transcript	33686	42520	0.49	-	.	g122.t1
NODE_2151_length_82389_cov_27.497274	AUGUSTUS	stop_codon	33686	33688	.	-	0	transcript_id "g122.t1"; gene_id "g122";
NODE_2151_length_82389_cov_27.497274	AUGUSTUS	intron	33822	42317	0.49	-	.	transcript_id "g122.t1"; gene_id "g122";
NODE_2151_length_82389_cov_27.497274	AUGUSTUS	CDS	33686	33821	0.91	-	1	transcript_id "g122.t1"; gene_id "g122";
NODE_2151_length_82389_cov_27.497274	AUGUSTUS	CDS	42318	42520	0.55	-	0	transcript_id "g122.t1"; gene_id "g122";
NODE_2151_length_82389_cov_27.497274	AUGUSTUS	start_codon	42518	42520	.	-	0	transcript_id "g122.t1"; gene_id "g122";
NODE_2151_length_82389_cov_27.497274	AUGUSTUS	gene	48000	56969	0.36	+	.	g123
NODE_2151_length_82389_cov_27.497274	AUGUSTUS	transcript	48000	56969	0.36	+	.	g123.t1
NODE_2151_length_82389_cov_27.497274	AUGUSTUS	start_codon	48000	48002	.	+	0	transcript_id "g123.t1"; gene_id "g123";
NODE_2151_length_82389_cov_27.497274	AUGUSTUS	intron	48056	56779	0.37	+	.	transcript_id "g123.t1"; gene_id "g123";
NODE_2151_length_82389_cov_27.497274	AUGUSTUS	CDS	48000	48055	0.59	+	0	transcript_id "g123.t1"; gene_id "g123";
NODE_2151_length_82389_cov_27.497274	AUGUSTUS	CDS	56780	56969	0.42	+	1	transcript_id "g123.t1"; gene_id "g123";
NODE_2151_length_82389_cov_27.497274	AUGUSTUS	stop_codon	56967	56969	.	+	0	transcript_id "g123.t1"; gene_id "g123";
NODE_2151_length_82389_cov_27.497274	AUGUSTUS	gene	67830	68954	0.63	+	.	g124
NODE_2151_length_82389_cov_27.497274	AUGUSTUS	transcript	67830	68954	0.63	+	.	g124.t1
NODE_2151_length_82389_cov_27.497274	AUGUSTUS	start_codon	67830	67832	.	+	0	transcript_id "g124.t1"; gene_id "g124";
NODE_2151_length_82389_cov_27.497274	AUGUSTUS	CDS	67830	68954	0.63	+	0	transcript_id "g124.t1"; gene_id "g124";
NODE_2151_length_82389_cov_27.497274	AUGUSTUS	stop_codon	68952	68954	.	+	0	transcript_id "g124.t1"; gene_id "g124";
NODE_2151_length_82389_cov_27.497274	AUGUSTUS	gene	69253	72603	0.51	+	.	g125
NODE_2151_length_82389_cov_27.497274	AUGUSTUS	transcript	69253	72603	0.51	+	.	g125.t1
NODE_2151_length_82389_cov_27.497274	AUGUSTUS	start_codon	69253	69255	.	+	0	transcript_id "g125.t1"; gene_id "g125";
NODE_2151_length_82389_cov_27.497274	AUGUSTUS	intron	69299	71954	0.51	+	.	transcript_id "g125.t1"; gene_id "g125";
NODE_2151_length_82389_cov_27.497274	AUGUSTUS	intron	72175	72281	1	+	.	transcript_id "g125.t1"; gene_id "g125";
NODE_2151_length_82389_cov_27.497274	AUGUSTUS	CDS	69253	69298	0.51	+	0	transcript_id "g125.t1"; gene_id "g125";
NODE_2151_length_82389_cov_27.497274	AUGUSTUS	CDS	71955	72174	0.96	+	2	transcript_id "g125.t1"; gene_id "g125";
NODE_2151_length_82389_cov_27.497274	AUGUSTUS	CDS	72282	72603	1	+	1	transcript_id "g125.t1"; gene_id "g125";
NODE_2151_length_82389_cov_27.497274	AUGUSTUS	stop_codon	72601	72603	.	+	0	transcript_id "g125.t1"; gene_id "g125";
NODE_2155_length_23011_cov_29.997480	AUGUSTUS	gene	6571	7784	0.68	-	.	g126
NODE_2155_length_23011_cov_29.997480	AUGUSTUS	transcript	6571	7784	0.68	-	.	g126.t1
NODE_2155_length_23011_cov_29.997480	AUGUSTUS	stop_codon	6571	6573	.	-	0	transcript_id "g126.t1"; gene_id "g126";
NODE_2155_length_23011_cov_29.997480	AUGUSTUS	intron	6682	6770	1	-	.	transcript_id "g126.t1"; gene_id "g126";
NODE_2155_length_23011_cov_29.997480	AUGUSTUS	intron	7506	7604	1	-	.	transcript_id "g126.t1"; gene_id "g126";
NODE_2155_length_23011_cov_29.997480	AUGUSTUS	CDS	6571	6681	1	-	0	transcript_id "g126.t1"; gene_id "g126";
NODE_2155_length_23011_cov_29.997480	AUGUSTUS	CDS	6771	7505	1	-	0	transcript_id "g126.t1"; gene_id "g126";
NODE_2155_length_23011_cov_29.997480	AUGUSTUS	CDS	7605	7784	0.68	-	0	transcript_id "g126.t1"; gene_id "g126";
NODE_2155_length_23011_cov_29.997480	AUGUSTUS	start_codon	7782	7784	.	-	0	transcript_id "g126.t1"; gene_id "g126";
NODE_2155_length_23011_cov_29.997480	AUGUSTUS	gene	12084	21790	0.3	+	.	g127
NODE_2155_length_23011_cov_29.997480	AUGUSTUS	transcript	12084	21790	0.3	+	.	g127.t1
NODE_2155_length_23011_cov_29.997480	AUGUSTUS	start_codon	12084	12086	.	+	0	transcript_id "g127.t1"; gene_id "g127";
NODE_2155_length_23011_cov_29.997480	AUGUSTUS	intron	12135	17612	0.31	+	.	transcript_id "g127.t1"; gene_id "g127";
NODE_2155_length_23011_cov_29.997480	AUGUSTUS	intron	17708	17823	1	+	.	transcript_id "g127.t1"; gene_id "g127";
NODE_2155_length_23011_cov_29.997480	AUGUSTUS	intron	18314	20530	1	+	.	transcript_id "g127.t1"; gene_id "g127";
NODE_2155_length_23011_cov_29.997480	AUGUSTUS	CDS	12084	12134	0.3	+	0	transcript_id "g127.t1"; gene_id "g127";
NODE_2155_length_23011_cov_29.997480	AUGUSTUS	CDS	17613	17707	0.98	+	0	transcript_id "g127.t1"; gene_id "g127";
NODE_2155_length_23011_cov_29.997480	AUGUSTUS	CDS	17824	18313	1	+	1	transcript_id "g127.t1"; gene_id "g127";
NODE_2155_length_23011_cov_29.997480	AUGUSTUS	CDS	20531	21790	1	+	0	transcript_id "g127.t1"; gene_id "g127";
NODE_2155_length_23011_cov_29.997480	AUGUSTUS	stop_codon	21788	21790	.	+	0	transcript_id "g127.t1"; gene_id "g127";
NODE_2213_length_89_cov_49.853931	AUGUSTUS	gene	1	173	0.99	-	.	g128
NODE_2213_length_89_cov_49.853931	AUGUSTUS	transcript	1	173	0.99	-	.	g128.t1
NODE_2213_length_89_cov_49.853931	AUGUSTUS	CDS	1	173	0.99	-	0	transcript_id "g128.t1"; gene_id "g128";
NODE_2221_length_38748_cov_30.578327	AUGUSTUS	gene	29503	30990	0.72	-	.	g129
NODE_2221_length_38748_cov_30.578327	AUGUSTUS	transcript	29503	30990	0.72	-	.	g129.t1
NODE_2221_length_38748_cov_30.578327	AUGUSTUS	stop_codon	29503	29505	.	-	0	transcript_id "g129.t1"; gene_id "g129";
NODE_2221_length_38748_cov_30.578327	AUGUSTUS	intron	29589	29662	0.94	-	.	transcript_id "g129.t1"; gene_id "g129";
NODE_2221_length_38748_cov_30.578327	AUGUSTUS	intron	30780	30849	1	-	.	transcript_id "g129.t1"; gene_id "g129";
NODE_2221_length_38748_cov_30.578327	AUGUSTUS	CDS	29503	29588	0.75	-	2	transcript_id "g129.t1"; gene_id "g129";
NODE_2221_length_38748_cov_30.578327	AUGUSTUS	CDS	29663	30779	0.97	-	0	transcript_id "g129.t1"; gene_id "g129";
NODE_2221_length_38748_cov_30.578327	AUGUSTUS	CDS	30850	30990	0.97	-	0	transcript_id "g129.t1"; gene_id "g129";
NODE_2221_length_38748_cov_30.578327	AUGUSTUS	start_codon	30988	30990	.	-	0	transcript_id "g129.t1"; gene_id "g129";
NODE_2221_length_38748_cov_30.578327	AUGUSTUS	gene	33957	37101	0.29	+	.	g130
NODE_2221_length_38748_cov_30.578327	AUGUSTUS	transcript	33957	37101	0.29	+	.	g130.t1
NODE_2221_length_38748_cov_30.578327	AUGUSTUS	start_codon	33957	33959	.	+	0	transcript_id "g130.t1"; gene_id "g130";
NODE_2221_length_38748_cov_30.578327	AUGUSTUS	intron	34374	35512	0.77	+	.	transcript_id "g130.t1"; gene_id "g130";
NODE_2221_length_38748_cov_30.578327	AUGUSTUS	intron	36959	37095	0.47	+	.	transcript_id "g130.t1"; gene_id "g130";
NODE_2221_length_38748_cov_30.578327	AUGUSTUS	CDS	33957	34373	0.66	+	0	transcript_id "g130.t1"; gene_id "g130";
NODE_2221_length_38748_cov_30.578327	AUGUSTUS	CDS	35513	36958	0.88	+	0	transcript_id "g130.t1"; gene_id "g130";
NODE_2221_length_38748_cov_30.578327	AUGUSTUS	CDS	37096	37101	0.47	+	0	transcript_id "g130.t1"; gene_id "g130";
NODE_2221_length_38748_cov_30.578327	AUGUSTUS	stop_codon	37099	37101	.	+	0	transcript_id "g130.t1"; gene_id "g130";
NODE_2221_length_38748_cov_30.578327	AUGUSTUS	gene	38045	38832	0.66	+	.	g131
NODE_2221_length_38748_cov_30.578327	AUGUSTUS	transcript	38045	38832	0.66	+	.	g131.t1
NODE_2221_length_38748_cov_30.578327	AUGUSTUS	start_codon	38045	38047	.	+	0	transcript_id "g131.t1"; gene_id "g131";
NODE_2221_length_38748_cov_30.578327	AUGUSTUS	CDS	38045	38832	0.66	+	0	transcript_id "g131.t1"; gene_id "g131";
NODE_2228_length_29876_cov_27.679174	AUGUSTUS	gene	13786	18973	0.5	-	.	g132
NODE_2228_length_29876_cov_27.679174	AUGUSTUS	transcript	13786	18973	0.5	-	.	g132.t1
NODE_2228_length_29876_cov_27.679174	AUGUSTUS	stop_codon	13786	13788	.	-	0	transcript_id "g132.t1"; gene_id "g132";
NODE_2228_length_29876_cov_27.679174	AUGUSTUS	intron	13926	17203	0.6	-	.	transcript_id "g132.t1"; gene_id "g132";
NODE_2228_length_29876_cov_27.679174	AUGUSTUS	intron	17349	18757	0.56	-	.	transcript_id "g132.t1"; gene_id "g132";
NODE_2228_length_29876_cov_27.679174	AUGUSTUS	CDS	13786	13925	0.74	-	2	transcript_id "g132.t1"; gene_id "g132";
NODE_2228_length_29876_cov_27.679174	AUGUSTUS	CDS	17204	17348	0.58	-	0	transcript_id "g132.t1"; gene_id "g132";
NODE_2228_length_29876_cov_27.679174	AUGUSTUS	CDS	18758	18973	0.65	-	0	transcript_id "g132.t1"; gene_id "g132";
NODE_2228_length_29876_cov_27.679174	AUGUSTUS	start_codon	18971	18973	.	-	0	transcript_id "g132.t1"; gene_id "g132";
NODE_2231_length_18128_cov_26.849403	AUGUSTUS	gene	510	4848	0.31	+	.	g133
NODE_2231_length_18128_cov_26.849403	AUGUSTUS	transcript	510	4848	0.31	+	.	g133.t1
NODE_2231_length_18128_cov_26.849403	AUGUSTUS	start_codon	510	512	.	+	0	transcript_id "g133.t1"; gene_id "g133";
NODE_2231_length_18128_cov_26.849403	AUGUSTUS	intron	634	4323	0.37	+	.	transcript_id "g133.t1"; gene_id "g133";
NODE_2231_length_18128_cov_26.849403	AUGUSTUS	intron	4487	4745	1	+	.	transcript_id "g133.t1"; gene_id "g133";
NODE_2231_length_18128_cov_26.849403	AUGUSTUS	CDS	510	633	0.31	+	0	transcript_id "g133.t1"; gene_id "g133";
NODE_2231_length_18128_cov_26.849403	AUGUSTUS	CDS	4324	4486	0.73	+	2	transcript_id "g133.t1"; gene_id "g133";
NODE_2231_length_18128_cov_26.849403	AUGUSTUS	CDS	4746	4848	1	+	1	transcript_id "g133.t1"; gene_id "g133";
NODE_2231_length_18128_cov_26.849403	AUGUSTUS	stop_codon	4846	4848	.	+	0	transcript_id "g133.t1"; gene_id "g133";
NODE_2235_length_18703_cov_28.685024	AUGUSTUS	gene	1	6138	0.34	-	.	g134
NODE_2235_length_18703_cov_28.685024	AUGUSTUS	transcript	1	6138	0.34	-	.	g134.t1
NODE_2235_length_18703_cov_28.685024	AUGUSTUS	intron	1	2590	0.91	-	.	transcript_id "g134.t1"; gene_id "g134";
NODE_2235_length_18703_cov_28.685024	AUGUSTUS	intron	2626	5981	0.79	-	.	transcript_id "g134.t1"; gene_id "g134";
NODE_2235_length_18703_cov_28.685024	AUGUSTUS	CDS	2591	2625	1	-	2	transcript_id "g134.t1"; gene_id "g134";
NODE_2235_length_18703_cov_28.685024	AUGUSTUS	CDS	5982	6138	0.46	-	0	transcript_id "g134.t1"; gene_id "g134";
NODE_2235_length_18703_cov_28.685024	AUGUSTUS	start_codon	6136	6138	.	-	0	transcript_id "g134.t1"; gene_id "g134";
NODE_2282_length_108_cov_543.537048	AUGUSTUS	gene	1	192	1	+	.	g135
NODE_2282_length_108_cov_543.537048	AUGUSTUS	transcript	1	192	1	+	.	g135.t1
NODE_2282_length_108_cov_543.537048	AUGUSTUS	CDS	1	192	1	+	2	transcript_id "g135.t1"; gene_id "g135";
NODE_2320_length_4246_cov_27.913801	AUGUSTUS	gene	1	544	0.99	+	.	g136
NODE_2320_length_4246_cov_27.913801	AUGUSTUS	transcript	1	544	0.99	+	.	g136.t1
NODE_2320_length_4246_cov_27.913801	AUGUSTUS	CDS	1	544	0.99	+	1	transcript_id "g136.t1"; gene_id "g136";
NODE_2320_length_4246_cov_27.913801	AUGUSTUS	stop_codon	542	544	.	+	0	transcript_id "g136.t1"; gene_id "g136";
NODE_2320_length_4246_cov_27.913801	AUGUSTUS	gene	3673	4330	0.99	+	.	g137
NODE_2320_length_4246_cov_27.913801	AUGUSTUS	transcript	3673	4330	0.99	+	.	g137.t1
NODE_2320_length_4246_cov_27.913801	AUGUSTUS	start_codon	3673	3675	.	+	0	transcript_id "g137.t1"; gene_id "g137";
NODE_2320_length_4246_cov_27.913801	AUGUSTUS	intron	4043	4118	1	+	.	transcript_id "g137.t1"; gene_id "g137";
NODE_2320_length_4246_cov_27.913801	AUGUSTUS	CDS	3673	4042	1	+	0	transcript_id "g137.t1"; gene_id "g137";
NODE_2320_length_4246_cov_27.913801	AUGUSTUS	CDS	4119	4330	0.99	+	2	transcript_id "g137.t1"; gene_id "g137";
NODE_2440_length_827_cov_96.810158	AUGUSTUS	gene	341	607	0.82	+	.	g138
NODE_2440_length_827_cov_96.810158	AUGUSTUS	transcript	341	607	0.82	+	.	g138.t1
NODE_2440_length_827_cov_96.810158	AUGUSTUS	start_codon	341	343	.	+	0	transcript_id "g138.t1"; gene_id "g138";
NODE_2440_length_827_cov_96.810158	AUGUSTUS	CDS	341	607	0.82	+	0	transcript_id "g138.t1"; gene_id "g138";
NODE_2440_length_827_cov_96.810158	AUGUSTUS	stop_codon	605	607	.	+	0	transcript_id "g138.t1"; gene_id "g138";
NODE_2448_length_405_cov_12.338271	AUGUSTUS	gene	1	300	0.5	+	.	g139
NODE_2448_length_405_cov_12.338271	AUGUSTUS	transcript	1	300	0.5	+	.	g139.t1
NODE_2448_length_405_cov_12.338271	AUGUSTUS	intron	1	67	0.5	+	.	transcript_id "g139.t1"; gene_id "g139";
NODE_2448_length_405_cov_12.338271	AUGUSTUS	CDS	68	300	0.5	+	2	transcript_id "g139.t1"; gene_id "g139";
NODE_2448_length_405_cov_12.338271	AUGUSTUS	stop_codon	298	300	.	+	0	transcript_id "g139.t1"; gene_id "g139";
NODE_2480_length_328_cov_17.018293	AUGUSTUS	gene	210	412	0.82	+	.	g140
NODE_2480_length_328_cov_17.018293	AUGUSTUS	transcript	210	412	0.82	+	.	g140.t1
NODE_2480_length_328_cov_17.018293	AUGUSTUS	start_codon	210	212	.	+	0	transcript_id "g140.t1"; gene_id "g140";
NODE_2480_length_328_cov_17.018293	AUGUSTUS	CDS	210	412	0.82	+	0	transcript_id "g140.t1"; gene_id "g140";
NODE_2508_length_568_cov_80.227112	AUGUSTUS	gene	159	652	0.97	+	.	g141
NODE_2508_length_568_cov_80.227112	AUGUSTUS	transcript	159	652	0.97	+	.	g141.t1
NODE_2508_length_568_cov_80.227112	AUGUSTUS	start_codon	159	161	.	+	0	transcript_id "g141.t1"; gene_id "g141";
NODE_2508_length_568_cov_80.227112	AUGUSTUS	CDS	159	652	0.97	+	0	transcript_id "g141.t1"; gene_id "g141";
NODE_2559_length_84063_cov_30.887905	AUGUSTUS	gene	2467	5014	0.18	+	.	g142
NODE_2559_length_84063_cov_30.887905	AUGUSTUS	transcript	2467	5014	0.18	+	.	g142.t1
NODE_2559_length_84063_cov_30.887905	AUGUSTUS	start_codon	2467	2469	.	+	0	transcript_id "g142.t1"; gene_id "g142";
NODE_2559_length_84063_cov_30.887905	AUGUSTUS	intron	2811	2887	0.89	+	.	transcript_id "g142.t1"; gene_id "g142";
NODE_2559_length_84063_cov_30.887905	AUGUSTUS	intron	3588	3739	0.85	+	.	transcript_id "g142.t1"; gene_id "g142";
NODE_2559_length_84063_cov_30.887905	AUGUSTUS	intron	3942	4462	1	+	.	transcript_id "g142.t1"; gene_id "g142";
NODE_2559_length_84063_cov_30.887905	AUGUSTUS	intron	4579	4654	1	+	.	transcript_id "g142.t1"; gene_id "g142";
NODE_2559_length_84063_cov_30.887905	AUGUSTUS	CDS	2467	2810	0.95	+	0	transcript_id "g142.t1"; gene_id "g142";
NODE_2559_length_84063_cov_30.887905	AUGUSTUS	CDS	2888	3587	0.89	+	1	transcript_id "g142.t1"; gene_id "g142";
NODE_2559_length_84063_cov_30.887905	AUGUSTUS	CDS	3740	3941	0.85	+	0	transcript_id "g142.t1"; gene_id "g142";
NODE_2559_length_84063_cov_30.887905	AUGUSTUS	CDS	4463	4578	1	+	2	transcript_id "g142.t1"; gene_id "g142";
NODE_2559_length_84063_cov_30.887905	AUGUSTUS	CDS	4655	5014	0.27	+	0	transcript_id "g142.t1"; gene_id "g142";
NODE_2559_length_84063_cov_30.887905	AUGUSTUS	stop_codon	5012	5014	.	+	0	transcript_id "g142.t1"; gene_id "g142";
NODE_2559_length_84063_cov_30.887905	AUGUSTUS	gene	5738	7012	0.35	+	.	g143
NODE_2559_length_84063_cov_30.887905	AUGUSTUS	transcript	5738	7012	0.35	+	.	g143.t1
NODE_2559_length_84063_cov_30.887905	AUGUSTUS	start_codon	5738	5740	.	+	0	transcript_id "g143.t1"; gene_id "g143";
NODE_2559_length_84063_cov_30.887905	AUGUSTUS	intron	5933	6092	0.92	+	.	transcript_id "g143.t1"; gene_id "g143";
NODE_2559_length_84063_cov_30.887905	AUGUSTUS	intron	6244	6347	1	+	.	transcript_id "g143.t1"; gene_id "g143";
NODE_2559_length_84063_cov_30.887905	AUGUSTUS	CDS	5738	5932	0.45	+	0	transcript_id "g143.t1"; gene_id "g143";
NODE_2559_length_84063_cov_30.887905	AUGUSTUS	CDS	6093	6243	0.92	+	0	transcript_id "g143.t1"; gene_id "g143";
NODE_2559_length_84063_cov_30.887905	AUGUSTUS	CDS	6348	7012	0.82	+	2	transcript_id "g143.t1"; gene_id "g143";
NODE_2559_length_84063_cov_30.887905	AUGUSTUS	stop_codon	7010	7012	.	+	0	transcript_id "g143.t1"; gene_id "g143";
NODE_2559_length_84063_cov_30.887905	AUGUSTUS	gene	9489	9805	0.63	+	.	g144
NODE_2559_length_84063_cov_30.887905	AUGUSTUS	transcript	9489	9805	0.63	+	.	g144.t1
NODE_2559_length_84063_cov_30.887905	AUGUSTUS	start_codon	9489	9491	.	+	0	transcript_id "g144.t1"; gene_id "g144";
NODE_2559_length_84063_cov_30.887905	AUGUSTUS	intron	9607	9680	0.98	+	.	transcript_id "g144.t1"; gene_id "g144";
NODE_2559_length_84063_cov_30.887905	AUGUSTUS	CDS	9489	9606	0.65	+	0	transcript_id "g144.t1"; gene_id "g144";
NODE_2559_length_84063_cov_30.887905	AUGUSTUS	CDS	9681	9805	0.98	+	2	transcript_id "g144.t1"; gene_id "g144";
NODE_2559_length_84063_cov_30.887905	AUGUSTUS	stop_codon	9803	9805	.	+	0	transcript_id "g144.t1"; gene_id "g144";
NODE_2559_length_84063_cov_30.887905	AUGUSTUS	gene	15235	24990	0.53	+	.	g145
NODE_2559_length_84063_cov_30.887905	AUGUSTUS	transcript	15235	24990	0.53	+	.	g145.t1
NODE_2559_length_84063_cov_30.887905	AUGUSTUS	start_codon	15235	15237	.	+	0	transcript_id "g145.t1"; gene_id "g145";
NODE_2559_length_84063_cov_30.887905	AUGUSTUS	intron	15278	17642	1	+	.	transcript_id "g145.t1"; gene_id "g145";
NODE_2559_length_84063_cov_30.887905	AUGUSTUS	intron	17924	24933	0.8	+	.	transcript_id "g145.t1"; gene_id "g145";
NODE_2559_length_84063_cov_30.887905	AUGUSTUS	CDS	15235	15277	0.68	+	0	transcript_id "g145.t1"; gene_id "g145";
NODE_2559_length_84063_cov_30.887905	AUGUSTUS	CDS	17643	17923	0.99	+	2	transcript_id "g145.t1"; gene_id "g145";
NODE_2559_length_84063_cov_30.887905	AUGUSTUS	CDS	24934	24990	0.8	+	0	transcript_id "g145.t1"; gene_id "g145";
NODE_2559_length_84063_cov_30.887905	AUGUSTUS	stop_codon	24988	24990	.	+	0	transcript_id "g145.t1"; gene_id "g145";
NODE_2559_length_84063_cov_30.887905	AUGUSTUS	gene	25380	31818	0.79	+	.	g146
NODE_2559_length_84063_cov_30.887905	AUGUSTUS	transcript	25380	31818	0.79	+	.	g146.t1
NODE_2559_length_84063_cov_30.887905	AUGUSTUS	start_codon	25380	25382	.	+	0	transcript_id "g146.t1"; gene_id "g146";
NODE_2559_length_84063_cov_30.887905	AUGUSTUS	intron	30222	31674	0.97	+	.	transcript_id "g146.t1"; gene_id "g146";
NODE_2559_length_84063_cov_30.887905	AUGUSTUS	CDS	25380	30221	0.84	+	0	transcript_id "g146.t1"; gene_id "g146";
NODE_2559_length_84063_cov_30.887905	AUGUSTUS	CDS	31675	31818	0.94	+	0	transcript_id "g146.t1"; gene_id "g146";
NODE_2559_length_84063_cov_30.887905	AUGUSTUS	stop_codon	31816	31818	.	+	0	transcript_id "g146.t1"; gene_id "g146";
NODE_2559_length_84063_cov_30.887905	AUGUSTUS	gene	39691	55162	0.16	+	.	g147
NODE_2559_length_84063_cov_30.887905	AUGUSTUS	transcript	39691	55162	0.16	+	.	g147.t1
NODE_2559_length_84063_cov_30.887905	AUGUSTUS	start_codon	39691	39693	.	+	0	transcript_id "g147.t1"; gene_id "g147";
NODE_2559_length_84063_cov_30.887905	AUGUSTUS	intron	39813	39881	0.74	+	.	transcript_id "g147.t1"; gene_id "g147";
NODE_2559_length_84063_cov_30.887905	AUGUSTUS	intron	40053	40151	1	+	.	transcript_id "g147.t1"; gene_id "g147";
NODE_2559_length_84063_cov_30.887905	AUGUSTUS	intron	40284	40388	1	+	.	transcript_id "g147.t1"; gene_id "g147";
NODE_2559_length_84063_cov_30.887905	AUGUSTUS	intron	40566	40791	1	+	.	transcript_id "g147.t1"; gene_id "g147";
NODE_2559_length_84063_cov_30.887905	AUGUSTUS	intron	40958	47882	0.71	+	.	transcript_id "g147.t1"; gene_id "g147";
NODE_2559_length_84063_cov_30.887905	AUGUSTUS	intron	47976	49675	0.74	+	.	transcript_id "g147.t1"; gene_id "g147";
NODE_2559_length_84063_cov_30.887905	AUGUSTUS	intron	49806	49987	1	+	.	transcript_id "g147.t1"; gene_id "g147";
NODE_2559_length_84063_cov_30.887905	AUGUSTUS	intron	53347	53661	0.55	+	.	transcript_id "g147.t1"; gene_id "g147";
NODE_2559_length_84063_cov_30.887905	AUGUSTUS	intron	53783	53973	1	+	.	transcript_id "g147.t1"; gene_id "g147";
NODE_2559_length_84063_cov_30.887905	AUGUSTUS	intron	55066	55136	0.83	+	.	transcript_id "g147.t1"; gene_id "g147";
NODE_2559_length_84063_cov_30.887905	AUGUSTUS	CDS	39691	39812	0.78	+	0	transcript_id "g147.t1"; gene_id "g147";
NODE_2559_length_84063_cov_30.887905	AUGUSTUS	CDS	39882	40052	0.74	+	1	transcript_id "g147.t1"; gene_id "g147";
NODE_2559_length_84063_cov_30.887905	AUGUSTUS	CDS	40152	40283	1	+	1	transcript_id "g147.t1"; gene_id "g147";
NODE_2559_length_84063_cov_30.887905	AUGUSTUS	CDS	40389	40565	1	+	1	transcript_id "g147.t1"; gene_id "g147";
NODE_2559_length_84063_cov_30.887905	AUGUSTUS	CDS	40792	40957	1	+	1	transcript_id "g147.t1"; gene_id "g147";
NODE_2559_length_84063_cov_30.887905	AUGUSTUS	CDS	47883	47975	0.76	+	0	transcript_id "g147.t1"; gene_id "g147";
NODE_2559_length_84063_cov_30.887905	AUGUSTUS	CDS	49676	49805	0.98	+	0	transcript_id "g147.t1"; gene_id "g147";
NODE_2559_length_84063_cov_30.887905	AUGUSTUS	CDS	49988	53346	0.56	+	2	transcript_id "g147.t1"; gene_id "g147";
NODE_2559_length_84063_cov_30.887905	AUGUSTUS	CDS	53662	53782	0.71	+	0	transcript_id "g147.t1"; gene_id "g147";
NODE_2559_length_84063_cov_30.887905	AUGUSTUS	CDS	53974	55065	0.99	+	2	transcript_id "g147.t1"; gene_id "g147";
NODE_2559_length_84063_cov_30.887905	AUGUSTUS	CDS	55137	55162	0.84	+	2	transcript_id "g147.t1"; gene_id "g147";
NODE_2559_length_84063_cov_30.887905	AUGUSTUS	stop_codon	55160	55162	.	+	0	transcript_id "g147.t1"; gene_id "g147";
NODE_2559_length_84063_cov_30.887905	AUGUSTUS	gene	55898	71628	0.27	+	.	g148
NODE_2559_length_84063_cov_30.887905	AUGUSTUS	transcript	55898	71628	0.27	+	.	g148.t1
NODE_2559_length_84063_cov_30.887905	AUGUSTUS	start_codon	55898	55900	.	+	0	transcript_id "g148.t1"; gene_id "g148";
NODE_2559_length_84063_cov_30.887905	AUGUSTUS	intron	55986	56712	0.84	+	.	transcript_id "g148.t1"; gene_id "g148";
NODE_2559_length_84063_cov_30.887905	AUGUSTUS	intron	56953	57032	1	+	.	transcript_id "g148.t1"; gene_id "g148";
NODE_2559_length_84063_cov_30.887905	AUGUSTUS	intron	57175	57345	1	+	.	transcript_id "g148.t1"; gene_id "g148";
NODE_2559_length_84063_cov_30.887905	AUGUSTUS	intron	58298	58795	1	+	.	transcript_id "g148.t1"; gene_id "g148";
NODE_2559_length_84063_cov_30.887905	AUGUSTUS	intron	59712	60031	1	+	.	transcript_id "g148.t1"; gene_id "g148";
NODE_2559_length_84063_cov_30.887905	AUGUSTUS	intron	60467	60970	0.35	+	.	transcript_id "g148.t1"; gene_id "g148";
NODE_2559_length_84063_cov_30.887905	AUGUSTUS	intron	61106	61543	0.74	+	.	transcript_id "g148.t1"; gene_id "g148";
NODE_2559_length_84063_cov_30.887905	AUGUSTUS	intron	62447	63444	0.95	+	.	transcript_id "g148.t1"; gene_id "g148";
NODE_2559_length_84063_cov_30.887905	AUGUSTUS	intron	63612	63688	1	+	.	transcript_id "g148.t1"; gene_id "g148";
NODE_2559_length_84063_cov_30.887905	AUGUSTUS	intron	63804	63877	1	+	.	transcript_id "g148.t1"; gene_id "g148";
NODE_2559_length_84063_cov_30.887905	AUGUSTUS	intron	64377	64455	1	+	.	transcript_id "g148.t1"; gene_id "g148";
NODE_2559_length_84063_cov_30.887905	AUGUSTUS	intron	64560	64631	1	+	.	transcript_id "g148.t1"; gene_id "g148";
NODE_2559_length_84063_cov_30.887905	AUGUSTUS	intron	65095	65158	1	+	.	transcript_id "g148.t1"; gene_id "g148";
NODE_2559_length_84063_cov_30.887905	AUGUSTUS	intron	65299	65414	1	+	.	transcript_id "g148.t1"; gene_id "g148";
NODE_2559_length_84063_cov_30.887905	AUGUSTUS	intron	66595	66673	1	+	.	transcript_id "g148.t1"; gene_id "g148";
NODE_2559_length_84063_cov_30.887905	AUGUSTUS	intron	67887	67981	0.94	+	.	transcript_id "g148.t1"; gene_id "g148";
NODE_2559_length_84063_cov_30.887905	AUGUSTUS	intron	69404	69490	1	+	.	transcript_id "g148.t1"; gene_id "g148";
NODE_2559_length_84063_cov_30.887905	AUGUSTUS	intron	70926	70993	1	+	.	transcript_id "g148.t1"; gene_id "g148";
NODE_2559_length_84063_cov_30.887905	AUGUSTUS	intron	71220	71290	1	+	.	transcript_id "g148.t1"; gene_id "g148";
NODE_2559_length_84063_cov_30.887905	AUGUSTUS	intron	71397	71490	0.97	+	.	transcript_id "g148.t1"; gene_id "g148";
NODE_2559_length_84063_cov_30.887905	AUGUSTUS	CDS	55898	55985	0.84	+	0	transcript_id "g148.t1"; gene_id "g148";
NODE_2559_length_84063_cov_30.887905	AUGUSTUS	CDS	56713	56952	1	+	2	transcript_id "g148.t1"; gene_id "g148";
NODE_2559_length_84063_cov_30.887905	AUGUSTUS	CDS	57033	57174	1	+	2	transcript_id "g148.t1"; gene_id "g148";
NODE_2559_length_84063_cov_30.887905	AUGUSTUS	CDS	57346	58297	1	+	1	transcript_id "g148.t1"; gene_id "g148";
NODE_2559_length_84063_cov_30.887905	AUGUSTUS	CDS	58796	59711	1	+	0	transcript_id "g148.t1"; gene_id "g148";
NODE_2559_length_84063_cov_30.887905	AUGUSTUS	CDS	60032	60466	0.51	+	2	transcript_id "g148.t1"; gene_id "g148";
NODE_2559_length_84063_cov_30.887905	AUGUSTUS	CDS	60971	61105	0.61	+	2	transcript_id "g148.t1"; gene_id "g148";
NODE_2559_length_84063_cov_30.887905	AUGUSTUS	CDS	61544	62446	0.93	+	2	transcript_id "g148.t1"; gene_id "g148";
NODE_2559_length_84063_cov_30.887905	AUGUSTUS	CDS	63445	63611	1	+	2	transcript_id "g148.t1"; gene_id "g148";
NODE_2559_length_84063_cov_30.887905	AUGUSTUS	CDS	63689	63803	1	+	0	transcript_id "g148.t1"; gene_id "g148";
NODE_2559_length_84063_cov_30.887905	AUGUSTUS	CDS	63878	64376	1	+	2	transcript_id "g148.t1"; gene_id "g148";
NODE_2559_length_84063_cov_30.887905	AUGUSTUS	CDS	64456	64559	1	+	1	transcript_id "g148.t1"; gene_id "g148";
NODE_2559_length_84063_cov_30.887905	AUGUSTUS	CDS	64632	65094	1	+	2	transcript_id "g148.t1"; gene_id "g148";
NODE_2559_length_84063_cov_30.887905	AUGUSTUS	CDS	65159	65298	1	+	1	transcript_id "g148.t1"; gene_id "g148";
NODE_2559_length_84063_cov_30.887905	AUGUSTUS	CDS	65415	66594	1	+	2	transcript_id "g148.t1"; gene_id "g148";
NODE_2559_length_84063_cov_30.887905	AUGUSTUS	CDS	66674	67886	1	+	1	transcript_id "g148.t1"; gene_id "g148";
NODE_2559_length_84063_cov_30.887905	AUGUSTUS	CDS	67982	69403	0.94	+	0	transcript_id "g148.t1"; gene_id "g148";
NODE_2559_length_84063_cov_30.887905	AUGUSTUS	CDS	69491	70925	1	+	0	transcript_id "g148.t1"; gene_id "g148";
NODE_2559_length_84063_cov_30.887905	AUGUSTUS	CDS	70994	71219	1	+	2	transcript_id "g148.t1"; gene_id "g148";
NODE_2559_length_84063_cov_30.887905	AUGUSTUS	CDS	71291	71396	1	+	1	transcript_id "g148.t1"; gene_id "g148";
NODE_2559_length_84063_cov_30.887905	AUGUSTUS	CDS	71491	71628	0.97	+	0	transcript_id "g148.t1"; gene_id "g148";
NODE_2559_length_84063_cov_30.887905	AUGUSTUS	stop_codon	71626	71628	.	+	0	transcript_id "g148.t1"; gene_id "g148";
NODE_2559_length_84063_cov_30.887905	AUGUSTUS	gene	73748	81940	0.75	-	.	g149
NODE_2559_length_84063_cov_30.887905	AUGUSTUS	transcript	73748	81940	0.75	-	.	g149.t1
NODE_2559_length_84063_cov_30.887905	AUGUSTUS	stop_codon	73748	73750	.	-	0	transcript_id "g149.t1"; gene_id "g149";
NODE_2559_length_84063_cov_30.887905	AUGUSTUS	intron	73799	74200	0.81	-	.	transcript_id "g149.t1"; gene_id "g149";
NODE_2559_length_84063_cov_30.887905	AUGUSTUS	intron	74303	74363	0.96	-	.	transcript_id "g149.t1"; gene_id "g149";
NODE_2559_length_84063_cov_30.887905	AUGUSTUS	intron	78507	78818	0.99	-	.	transcript_id "g149.t1"; gene_id "g149";
NODE_2559_length_84063_cov_30.887905	AUGUSTUS	intron	78963	79074	1	-	.	transcript_id "g149.t1"; gene_id "g149";
NODE_2559_length_84063_cov_30.887905	AUGUSTUS	intron	81761	81878	1	-	.	transcript_id "g149.t1"; gene_id "g149";
NODE_2559_length_84063_cov_30.887905	AUGUSTUS	CDS	73748	73798	0.86	-	0	transcript_id "g149.t1"; gene_id "g149";
NODE_2559_length_84063_cov_30.887905	AUGUSTUS	CDS	74201	74302	0.87	-	0	transcript_id "g149.t1"; gene_id "g149";
NODE_2559_length_84063_cov_30.887905	AUGUSTUS	CDS	74364	78506	1	-	0	transcript_id "g149.t1"; gene_id "g149";
NODE_2559_length_84063_cov_30.887905	AUGUSTUS	CDS	78819	78962	0.99	-	0	transcript_id "g149.t1"; gene_id "g149";
NODE_2559_length_84063_cov_30.887905	AUGUSTUS	CDS	79075	81760	1	-	1	transcript_id "g149.t1"; gene_id "g149";
NODE_2559_length_84063_cov_30.887905	AUGUSTUS	CDS	81879	81940	0.98	-	0	transcript_id "g149.t1"; gene_id "g149";
NODE_2559_length_84063_cov_30.887905	AUGUSTUS	start_codon	81938	81940	.	-	0	transcript_id "g149.t1"; gene_id "g149";
NODE_2560_length_974926_cov_31.233547	AUGUSTUS	gene	38385	39906	0.92	-	.	g150
NODE_2560_length_974926_cov_31.233547	AUGUSTUS	transcript	38385	39906	0.92	-	.	g150.t1
NODE_2560_length_974926_cov_31.233547	AUGUSTUS	stop_codon	38385	38387	.	-	0	transcript_id "g150.t1"; gene_id "g150";
NODE_2560_length_974926_cov_31.233547	AUGUSTUS	intron	38685	38768	1	-	.	transcript_id "g150.t1"; gene_id "g150";
NODE_2560_length_974926_cov_31.233547	AUGUSTUS	intron	39044	39110	0.93	-	.	transcript_id "g150.t1"; gene_id "g150";
NODE_2560_length_974926_cov_31.233547	AUGUSTUS	CDS	38385	38684	0.99	-	0	transcript_id "g150.t1"; gene_id "g150";
NODE_2560_length_974926_cov_31.233547	AUGUSTUS	CDS	38769	39043	0.93	-	2	transcript_id "g150.t1"; gene_id "g150";
NODE_2560_length_974926_cov_31.233547	AUGUSTUS	CDS	39111	39906	1	-	0	transcript_id "g150.t1"; gene_id "g150";
NODE_2560_length_974926_cov_31.233547	AUGUSTUS	start_codon	39904	39906	.	-	0	transcript_id "g150.t1"; gene_id "g150";
NODE_2560_length_974926_cov_31.233547	AUGUSTUS	gene	47809	53697	0.25	+	.	g151
NODE_2560_length_974926_cov_31.233547	AUGUSTUS	transcript	47809	53697	0.25	+	.	g151.t1
NODE_2560_length_974926_cov_31.233547	AUGUSTUS	start_codon	47809	47811	.	+	0	transcript_id "g151.t1"; gene_id "g151";
NODE_2560_length_974926_cov_31.233547	AUGUSTUS	intron	47886	49302	0.39	+	.	transcript_id "g151.t1"; gene_id "g151";
NODE_2560_length_974926_cov_31.233547	AUGUSTUS	intron	50556	50628	1	+	.	transcript_id "g151.t1"; gene_id "g151";
NODE_2560_length_974926_cov_31.233547	AUGUSTUS	intron	50887	53422	0.66	+	.	transcript_id "g151.t1"; gene_id "g151";
NODE_2560_length_974926_cov_31.233547	AUGUSTUS	CDS	47809	47885	0.4	+	0	transcript_id "g151.t1"; gene_id "g151";
NODE_2560_length_974926_cov_31.233547	AUGUSTUS	CDS	49303	50555	0.97	+	1	transcript_id "g151.t1"; gene_id "g151";
NODE_2560_length_974926_cov_31.233547	AUGUSTUS	CDS	50629	50886	0.98	+	2	transcript_id "g151.t1"; gene_id "g151";
NODE_2560_length_974926_cov_31.233547	AUGUSTUS	CDS	53423	53697	1	+	2	transcript_id "g151.t1"; gene_id "g151";
NODE_2560_length_974926_cov_31.233547	AUGUSTUS	stop_codon	53695	53697	.	+	0	transcript_id "g151.t1"; gene_id "g151";
NODE_2560_length_974926_cov_31.233547	AUGUSTUS	gene	57281	61220	0.45	-	.	g152
NODE_2560_length_974926_cov_31.233547	AUGUSTUS	transcript	57281	61220	0.45	-	.	g152.t1
NODE_2560_length_974926_cov_31.233547	AUGUSTUS	stop_codon	57281	57283	.	-	0	transcript_id "g152.t1"; gene_id "g152";
NODE_2560_length_974926_cov_31.233547	AUGUSTUS	intron	57877	57944	1	-	.	transcript_id "g152.t1"; gene_id "g152";
NODE_2560_length_974926_cov_31.233547	AUGUSTUS	intron	58211	58276	1	-	.	transcript_id "g152.t1"; gene_id "g152";
NODE_2560_length_974926_cov_31.233547	AUGUSTUS	intron	58470	58539	1	-	.	transcript_id "g152.t1"; gene_id "g152";
NODE_2560_length_974926_cov_31.233547	AUGUSTUS	intron	58660	59307	0.97	-	.	transcript_id "g152.t1"; gene_id "g152";
NODE_2560_length_974926_cov_31.233547	AUGUSTUS	intron	59518	59578	0.98	-	.	transcript_id "g152.t1"; gene_id "g152";
NODE_2560_length_974926_cov_31.233547	AUGUSTUS	intron	60229	60299	1	-	.	transcript_id "g152.t1"; gene_id "g152";
NODE_2560_length_974926_cov_31.233547	AUGUSTUS	intron	60679	60797	1	-	.	transcript_id "g152.t1"; gene_id "g152";
NODE_2560_length_974926_cov_31.233547	AUGUSTUS	intron	60938	61017	1	-	.	transcript_id "g152.t1"; gene_id "g152";
NODE_2560_length_974926_cov_31.233547	AUGUSTUS	CDS	57281	57876	0.48	-	2	transcript_id "g152.t1"; gene_id "g152";
NODE_2560_length_974926_cov_31.233547	AUGUSTUS	CDS	57945	58210	1	-	1	transcript_id "g152.t1"; gene_id "g152";
NODE_2560_length_974926_cov_31.233547	AUGUSTUS	CDS	58277	58469	1	-	2	transcript_id "g152.t1"; gene_id "g152";
NODE_2560_length_974926_cov_31.233547	AUGUSTUS	CDS	58540	58659	1	-	2	transcript_id "g152.t1"; gene_id "g152";
NODE_2560_length_974926_cov_31.233547	AUGUSTUS	CDS	59308	59517	0.95	-	2	transcript_id "g152.t1"; gene_id "g152";
NODE_2560_length_974926_cov_31.233547	AUGUSTUS	CDS	59579	60228	1	-	1	transcript_id "g152.t1"; gene_id "g152";
NODE_2560_length_974926_cov_31.233547	AUGUSTUS	CDS	60300	60678	1	-	2	transcript_id "g152.t1"; gene_id "g152";
NODE_2560_length_974926_cov_31.233547	AUGUSTUS	CDS	60798	60937	1	-	1	transcript_id "g152.t1"; gene_id "g152";
NODE_2560_length_974926_cov_31.233547	AUGUSTUS	CDS	61018	61220	1	-	0	transcript_id "g152.t1"; gene_id "g152";
NODE_2560_length_974926_cov_31.233547	AUGUSTUS	start_codon	61218	61220	.	-	0	transcript_id "g152.t1"; gene_id "g152";
NODE_2560_length_974926_cov_31.233547	AUGUSTUS	gene	62492	64362	1	-	.	g153
NODE_2560_length_974926_cov_31.233547	AUGUSTUS	transcript	62492	64362	1	-	.	g153.t1
NODE_2560_length_974926_cov_31.233547	AUGUSTUS	stop_codon	62492	62494	.	-	0	transcript_id "g153.t1"; gene_id "g153";
NODE_2560_length_974926_cov_31.233547	AUGUSTUS	intron	62703	62774	1	-	.	transcript_id "g153.t1"; gene_id "g153";
NODE_2560_length_974926_cov_31.233547	AUGUSTUS	intron	64268	64347	1	-	.	transcript_id "g153.t1"; gene_id "g153";
NODE_2560_length_974926_cov_31.233547	AUGUSTUS	CDS	62492	62702	1	-	1	transcript_id "g153.t1"; gene_id "g153";
NODE_2560_length_974926_cov_31.233547	AUGUSTUS	CDS	62775	64267	1	-	0	transcript_id "g153.t1"; gene_id "g153";
NODE_2560_length_974926_cov_31.233547	AUGUSTUS	CDS	64348	64362	1	-	0	transcript_id "g153.t1"; gene_id "g153";
NODE_2560_length_974926_cov_31.233547	AUGUSTUS	start_codon	64360	64362	.	-	0	transcript_id "g153.t1"; gene_id "g153";
NODE_2560_length_974926_cov_31.233547	AUGUSTUS	gene	66342	68088	1	-	.	g154
NODE_2560_length_974926_cov_31.233547	AUGUSTUS	transcript	66342	68088	1	-	.	g154.t1
NODE_2560_length_974926_cov_31.233547	AUGUSTUS	stop_codon	66342	66344	.	-	0	transcript_id "g154.t1"; gene_id "g154";
NODE_2560_length_974926_cov_31.233547	AUGUSTUS	intron	67953	68013	1	-	.	transcript_id "g154.t1"; gene_id "g154";
NODE_2560_length_974926_cov_31.233547	AUGUSTUS	CDS	66342	67952	1	-	0	transcript_id "g154.t1"; gene_id "g154";
NODE_2560_length_974926_cov_31.233547	AUGUSTUS	CDS	68014	68088	1	-	0	transcript_id "g154.t1"; gene_id "g154";
NODE_2560_length_974926_cov_31.233547	AUGUSTUS	start_codon	68086	68088	.	-	0	transcript_id "g154.t1"; gene_id "g154";
NODE_2560_length_974926_cov_31.233547	AUGUSTUS	gene	68423	71826	0.84	+	.	g155
NODE_2560_length_974926_cov_31.233547	AUGUSTUS	transcript	68423	71826	0.84	+	.	g155.t1
NODE_2560_length_974926_cov_31.233547	AUGUSTUS	start_codon	68423	68425	.	+	0	transcript_id "g155.t1"; gene_id "g155";
NODE_2560_length_974926_cov_31.233547	AUGUSTUS	intron	71438	71511	0.9	+	.	transcript_id "g155.t1"; gene_id "g155";
NODE_2560_length_974926_cov_31.233547	AUGUSTUS	CDS	68423	71437	0.84	+	0	transcript_id "g155.t1"; gene_id "g155";
NODE_2560_length_974926_cov_31.233547	AUGUSTUS	CDS	71512	71826	0.9	+	0	transcript_id "g155.t1"; gene_id "g155";
NODE_2560_length_974926_cov_31.233547	AUGUSTUS	stop_codon	71824	71826	.	+	0	transcript_id "g155.t1"; gene_id "g155";
NODE_2560_length_974926_cov_31.233547	AUGUSTUS	gene	72150	72485	1	-	.	g156
NODE_2560_length_974926_cov_31.233547	AUGUSTUS	transcript	72150	72485	1	-	.	g156.t1
NODE_2560_length_974926_cov_31.233547	AUGUSTUS	stop_codon	72150	72152	.	-	0	transcript_id "g156.t1"; gene_id "g156";
NODE_2560_length_974926_cov_31.233547	AUGUSTUS	CDS	72150	72485	1	-	0	transcript_id "g156.t1"; gene_id "g156";
NODE_2560_length_974926_cov_31.233547	AUGUSTUS	start_codon	72483	72485	.	-	0	transcript_id "g156.t1"; gene_id "g156";
NODE_2560_length_974926_cov_31.233547	AUGUSTUS	gene	73111	75235	0.46	+	.	g157
NODE_2560_length_974926_cov_31.233547	AUGUSTUS	transcript	73111	75235	0.46	+	.	g157.t1
NODE_2560_length_974926_cov_31.233547	AUGUSTUS	start_codon	73111	73113	.	+	0	transcript_id "g157.t1"; gene_id "g157";
NODE_2560_length_974926_cov_31.233547	AUGUSTUS	intron	73316	73397	0.91	+	.	transcript_id "g157.t1"; gene_id "g157";
NODE_2560_length_974926_cov_31.233547	AUGUSTUS	CDS	73111	73315	0.91	+	0	transcript_id "g157.t1"; gene_id "g157";
NODE_2560_length_974926_cov_31.233547	AUGUSTUS	CDS	73398	75235	0.46	+	2	transcript_id "g157.t1"; gene_id "g157";
NODE_2560_length_974926_cov_31.233547	AUGUSTUS	stop_codon	75233	75235	.	+	0	transcript_id "g157.t1"; gene_id "g157";
NODE_2560_length_974926_cov_31.233547	AUGUSTUS	gene	98542	98943	0.76	-	.	g158
NODE_2560_length_974926_cov_31.233547	AUGUSTUS	transcript	98542	98943	0.76	-	.	g158.t1
NODE_2560_length_974926_cov_31.233547	AUGUSTUS	stop_codon	98542	98544	.	-	0	transcript_id "g158.t1"; gene_id "g158";
NODE_2560_length_974926_cov_31.233547	AUGUSTUS	CDS	98542	98943	0.76	-	0	transcript_id "g158.t1"; gene_id "g158";
NODE_2560_length_974926_cov_31.233547	AUGUSTUS	start_codon	98941	98943	.	-	0	transcript_id "g158.t1"; gene_id "g158";
NODE_2560_length_974926_cov_31.233547	AUGUSTUS	gene	98968	112706	0.36	-	.	g159
NODE_2560_length_974926_cov_31.233547	AUGUSTUS	transcript	98968	112706	0.36	-	.	g159.t1
NODE_2560_length_974926_cov_31.233547	AUGUSTUS	stop_codon	98968	98970	.	-	0	transcript_id "g159.t1"; gene_id "g159";
NODE_2560_length_974926_cov_31.233547	AUGUSTUS	intron	100716	104587	0.91	-	.	transcript_id "g159.t1"; gene_id "g159";
NODE_2560_length_974926_cov_31.233547	AUGUSTUS	intron	105353	107743	0.91	-	.	transcript_id "g159.t1"; gene_id "g159";
NODE_2560_length_974926_cov_31.233547	AUGUSTUS	intron	107887	111905	0.56	-	.	transcript_id "g159.t1"; gene_id "g159";
NODE_2560_length_974926_cov_31.233547	AUGUSTUS	intron	112031	112628	0.69	-	.	transcript_id "g159.t1"; gene_id "g159";
NODE_2560_length_974926_cov_31.233547	AUGUSTUS	CDS	98968	100715	1	-	2	transcript_id "g159.t1"; gene_id "g159";
NODE_2560_length_974926_cov_31.233547	AUGUSTUS	CDS	104588	105352	0.97	-	2	transcript_id "g159.t1"; gene_id "g159";
NODE_2560_length_974926_cov_31.233547	AUGUSTUS	CDS	107744	107886	0.56	-	1	transcript_id "g159.t1"; gene_id "g159";
NODE_2560_length_974926_cov_31.233547	AUGUSTUS	CDS	111906	112030	0.42	-	0	transcript_id "g159.t1"; gene_id "g159";
NODE_2560_length_974926_cov_31.233547	AUGUSTUS	CDS	112629	112706	0.89	-	0	transcript_id "g159.t1"; gene_id "g159";
NODE_2560_length_974926_cov_31.233547	AUGUSTUS	start_codon	112704	112706	.	-	0	transcript_id "g159.t1"; gene_id "g159";
NODE_2560_length_974926_cov_31.233547	AUGUSTUS	gene	116969	146755	0.4	+	.	g160
NODE_2560_length_974926_cov_31.233547	AUGUSTUS	transcript	116969	146755	0.4	+	.	g160.t1
NODE_2560_length_974926_cov_31.233547	AUGUSTUS	start_codon	116969	116971	.	+	0	transcript_id "g160.t1"; gene_id "g160";
NODE_2560_length_974926_cov_31.233547	AUGUSTUS	intron	117262	123052	0.67	+	.	transcript_id "g160.t1"; gene_id "g160";
NODE_2560_length_974926_cov_31.233547	AUGUSTUS	intron	123206	146433	0.46	+	.	transcript_id "g160.t1"; gene_id "g160";
NODE_2560_length_974926_cov_31.233547	AUGUSTUS	CDS	116969	117261	0.67	+	0	transcript_id "g160.t1"; gene_id "g160";
NODE_2560_length_974926_cov_31.233547	AUGUSTUS	CDS	123053	123205	0.65	+	1	transcript_id "g160.t1"; gene_id "g160";
NODE_2560_length_974926_cov_31.233547	AUGUSTUS	CDS	146434	146755	0.96	+	1	transcript_id "g160.t1"; gene_id "g160";
NODE_2560_length_974926_cov_31.233547	AUGUSTUS	stop_codon	146753	146755	.	+	0	transcript_id "g160.t1"; gene_id "g160";
NODE_2560_length_974926_cov_31.233547	AUGUSTUS	gene	148605	164714	0.26	-	.	g161
NODE_2560_length_974926_cov_31.233547	AUGUSTUS	transcript	148605	164714	0.26	-	.	g161.t1
NODE_2560_length_974926_cov_31.233547	AUGUSTUS	stop_codon	148605	148607	.	-	0	transcript_id "g161.t1"; gene_id "g161";
NODE_2560_length_974926_cov_31.233547	AUGUSTUS	intron	148872	164564	0.41	-	.	transcript_id "g161.t1"; gene_id "g161";
NODE_2560_length_974926_cov_31.233547	AUGUSTUS	CDS	148605	148871	0.89	-	0	transcript_id "g161.t1"; gene_id "g161";
NODE_2560_length_974926_cov_31.233547	AUGUSTUS	CDS	164565	164714	0.38	-	0	transcript_id "g161.t1"; gene_id "g161";
NODE_2560_length_974926_cov_31.233547	AUGUSTUS	start_codon	164712	164714	.	-	0	transcript_id "g161.t1"; gene_id "g161";
NODE_2560_length_974926_cov_31.233547	AUGUSTUS	gene	164787	165839	0.43	-	.	g162
NODE_2560_length_974926_cov_31.233547	AUGUSTUS	transcript	164787	165839	0.43	-	.	g162.t1
NODE_2560_length_974926_cov_31.233547	AUGUSTUS	stop_codon	164787	164789	.	-	0	transcript_id "g162.t1"; gene_id "g162";
NODE_2560_length_974926_cov_31.233547	AUGUSTUS	intron	164807	164875	1	-	.	transcript_id "g162.t1"; gene_id "g162";
NODE_2560_length_974926_cov_31.233547	AUGUSTUS	intron	165251	165337	1	-	.	transcript_id "g162.t1"; gene_id "g162";
NODE_2560_length_974926_cov_31.233547	AUGUSTUS	CDS	164787	164806	0.74	-	2	transcript_id "g162.t1"; gene_id "g162";
NODE_2560_length_974926_cov_31.233547	AUGUSTUS	CDS	164876	165250	1	-	2	transcript_id "g162.t1"; gene_id "g162";
NODE_2560_length_974926_cov_31.233547	AUGUSTUS	CDS	165338	165839	0.59	-	0	transcript_id "g162.t1"; gene_id "g162";
NODE_2560_length_974926_cov_31.233547	AUGUSTUS	start_codon	165837	165839	.	-	0	transcript_id "g162.t1"; gene_id "g162";
NODE_2560_length_974926_cov_31.233547	AUGUSTUS	gene	174046	206323	0.02	+	.	g163
NODE_2560_length_974926_cov_31.233547	AUGUSTUS	transcript	174046	206323	0.02	+	.	g163.t1
NODE_2560_length_974926_cov_31.233547	AUGUSTUS	start_codon	174046	174048	.	+	0	transcript_id "g163.t1"; gene_id "g163";
NODE_2560_length_974926_cov_31.233547	AUGUSTUS	intron	174299	190172	0.07	+	.	transcript_id "g163.t1"; gene_id "g163";
NODE_2560_length_974926_cov_31.233547	AUGUSTUS	intron	190301	192455	0.32	+	.	transcript_id "g163.t1"; gene_id "g163";
NODE_2560_length_974926_cov_31.233547	AUGUSTUS	intron	192522	206152	0.14	+	.	transcript_id "g163.t1"; gene_id "g163";
NODE_2560_length_974926_cov_31.233547	AUGUSTUS	CDS	174046	174298	0.1	+	0	transcript_id "g163.t1"; gene_id "g163";
NODE_2560_length_974926_cov_31.233547	AUGUSTUS	CDS	190173	190300	0.25	+	2	transcript_id "g163.t1"; gene_id "g163";
NODE_2560_length_974926_cov_31.233547	AUGUSTUS	CDS	192456	192521	0.51	+	0	transcript_id "g163.t1"; gene_id "g163";
NODE_2560_length_974926_cov_31.233547	AUGUSTUS	CDS	206153	206323	0.21	+	0	transcript_id "g163.t1"; gene_id "g163";
NODE_2560_length_974926_cov_31.233547	AUGUSTUS	stop_codon	206321	206323	.	+	0	transcript_id "g163.t1"; gene_id "g163";
NODE_2560_length_974926_cov_31.233547	AUGUSTUS	gene	215131	215388	0.28	+	.	g164
NODE_2560_length_974926_cov_31.233547	AUGUSTUS	transcript	215131	215388	0.28	+	.	g164.t1
NODE_2560_length_974926_cov_31.233547	AUGUSTUS	start_codon	215131	215133	.	+	0	transcript_id "g164.t1"; gene_id "g164";
NODE_2560_length_974926_cov_31.233547	AUGUSTUS	CDS	215131	215388	0.28	+	0	transcript_id "g164.t1"; gene_id "g164";
NODE_2560_length_974926_cov_31.233547	AUGUSTUS	stop_codon	215386	215388	.	+	0	transcript_id "g164.t1"; gene_id "g164";
NODE_2560_length_974926_cov_31.233547	AUGUSTUS	gene	223565	233232	0.27	+	.	g165
NODE_2560_length_974926_cov_31.233547	AUGUSTUS	transcript	223565	233232	0.27	+	.	g165.t1
NODE_2560_length_974926_cov_31.233547	AUGUSTUS	start_codon	223565	223567	.	+	0	transcript_id "g165.t1"; gene_id "g165";
NODE_2560_length_974926_cov_31.233547	AUGUSTUS	intron	223583	229416	0.3	+	.	transcript_id "g165.t1"; gene_id "g165";
NODE_2560_length_974926_cov_31.233547	AUGUSTUS	intron	229581	233093	0.39	+	.	transcript_id "g165.t1"; gene_id "g165";
NODE_2560_length_974926_cov_31.233547	AUGUSTUS	CDS	223565	223582	0.31	+	0	transcript_id "g165.t1"; gene_id "g165";
NODE_2560_length_974926_cov_31.233547	AUGUSTUS	CDS	229417	229580	0.39	+	0	transcript_id "g165.t1"; gene_id "g165";
NODE_2560_length_974926_cov_31.233547	AUGUSTUS	CDS	233094	233232	0.42	+	1	transcript_id "g165.t1"; gene_id "g165";
NODE_2560_length_974926_cov_31.233547	AUGUSTUS	stop_codon	233230	233232	.	+	0	transcript_id "g165.t1"; gene_id "g165";
NODE_2560_length_974926_cov_31.233547	AUGUSTUS	gene	244695	245132	0.92	+	.	g166
NODE_2560_length_974926_cov_31.233547	AUGUSTUS	transcript	244695	245132	0.92	+	.	g166.t1
NODE_2560_length_974926_cov_31.233547	AUGUSTUS	start_codon	244695	244697	.	+	0	transcript_id "g166.t1"; gene_id "g166";
NODE_2560_length_974926_cov_31.233547	AUGUSTUS	CDS	244695	245132	0.92	+	0	transcript_id "g166.t1"; gene_id "g166";
NODE_2560_length_974926_cov_31.233547	AUGUSTUS	stop_codon	245130	245132	.	+	0	transcript_id "g166.t1"; gene_id "g166";
NODE_2560_length_974926_cov_31.233547	AUGUSTUS	gene	250816	252896	0.1	+	.	g167
NODE_2560_length_974926_cov_31.233547	AUGUSTUS	transcript	250816	252896	0.1	+	.	g167.t1
NODE_2560_length_974926_cov_31.233547	AUGUSTUS	start_codon	250816	250818	.	+	0	transcript_id "g167.t1"; gene_id "g167";
NODE_2560_length_974926_cov_31.233547	AUGUSTUS	intron	251007	252718	0.25	+	.	transcript_id "g167.t1"; gene_id "g167";
NODE_2560_length_974926_cov_31.233547	AUGUSTUS	CDS	250816	251006	0.26	+	0	transcript_id "g167.t1"; gene_id "g167";
NODE_2560_length_974926_cov_31.233547	AUGUSTUS	CDS	252719	252896	0.33	+	1	transcript_id "g167.t1"; gene_id "g167";
NODE_2560_length_974926_cov_31.233547	AUGUSTUS	stop_codon	252894	252896	.	+	0	transcript_id "g167.t1"; gene_id "g167";
NODE_2560_length_974926_cov_31.233547	AUGUSTUS	gene	263605	267068	0.94	-	.	g168
NODE_2560_length_974926_cov_31.233547	AUGUSTUS	transcript	263605	267068	0.94	-	.	g168.t1
NODE_2560_length_974926_cov_31.233547	AUGUSTUS	stop_codon	263605	263607	.	-	0	transcript_id "g168.t1"; gene_id "g168";
NODE_2560_length_974926_cov_31.233547	AUGUSTUS	intron	263823	264019	1	-	.	transcript_id "g168.t1"; gene_id "g168";
NODE_2560_length_974926_cov_31.233547	AUGUSTUS	intron	264072	266720	0.96	-	.	transcript_id "g168.t1"; gene_id "g168";
NODE_2560_length_974926_cov_31.233547	AUGUSTUS	CDS	263605	263822	0.98	-	2	transcript_id "g168.t1"; gene_id "g168";
NODE_2560_length_974926_cov_31.233547	AUGUSTUS	CDS	264020	264071	0.98	-	0	transcript_id "g168.t1"; gene_id "g168";
NODE_2560_length_974926_cov_31.233547	AUGUSTUS	CDS	266721	267068	0.98	-	0	transcript_id "g168.t1"; gene_id "g168";
NODE_2560_length_974926_cov_31.233547	AUGUSTUS	start_codon	267066	267068	.	-	0	transcript_id "g168.t1"; gene_id "g168";
NODE_2560_length_974926_cov_31.233547	AUGUSTUS	gene	267220	268718	0.72	-	.	g169
NODE_2560_length_974926_cov_31.233547	AUGUSTUS	transcript	267220	268718	0.72	-	.	g169.t1
NODE_2560_length_974926_cov_31.233547	AUGUSTUS	stop_codon	267220	267222	.	-	0	transcript_id "g169.t1"; gene_id "g169";
NODE_2560_length_974926_cov_31.233547	AUGUSTUS	intron	267300	267388	0.76	-	.	transcript_id "g169.t1"; gene_id "g169";
NODE_2560_length_974926_cov_31.233547	AUGUSTUS	intron	268602	268706	0.96	-	.	transcript_id "g169.t1"; gene_id "g169";
NODE_2560_length_974926_cov_31.233547	AUGUSTUS	CDS	267220	267299	0.76	-	2	transcript_id "g169.t1"; gene_id "g169";
NODE_2560_length_974926_cov_31.233547	AUGUSTUS	CDS	267389	268601	0.72	-	0	transcript_id "g169.t1"; gene_id "g169";
NODE_2560_length_974926_cov_31.233547	AUGUSTUS	CDS	268707	268718	1	-	0	transcript_id "g169.t1"; gene_id "g169";
NODE_2560_length_974926_cov_31.233547	AUGUSTUS	start_codon	268716	268718	.	-	0	transcript_id "g169.t1"; gene_id "g169";
NODE_2560_length_974926_cov_31.233547	AUGUSTUS	gene	271736	273040	0.53	+	.	g170
NODE_2560_length_974926_cov_31.233547	AUGUSTUS	transcript	271736	273040	0.53	+	.	g170.t1
NODE_2560_length_974926_cov_31.233547	AUGUSTUS	start_codon	271736	271738	.	+	0	transcript_id "g170.t1"; gene_id "g170";
NODE_2560_length_974926_cov_31.233547	AUGUSTUS	intron	271833	272031	1	+	.	transcript_id "g170.t1"; gene_id "g170";
NODE_2560_length_974926_cov_31.233547	AUGUSTUS	intron	272208	272331	0.54	+	.	transcript_id "g170.t1"; gene_id "g170";
NODE_2560_length_974926_cov_31.233547	AUGUSTUS	intron	272784	272898	1	+	.	transcript_id "g170.t1"; gene_id "g170";
NODE_2560_length_974926_cov_31.233547	AUGUSTUS	CDS	271736	271832	1	+	0	transcript_id "g170.t1"; gene_id "g170";
NODE_2560_length_974926_cov_31.233547	AUGUSTUS	CDS	272032	272207	0.54	+	2	transcript_id "g170.t1"; gene_id "g170";
NODE_2560_length_974926_cov_31.233547	AUGUSTUS	CDS	272332	272783	1	+	0	transcript_id "g170.t1"; gene_id "g170";
NODE_2560_length_974926_cov_31.233547	AUGUSTUS	CDS	272899	273040	0.99	+	1	transcript_id "g170.t1"; gene_id "g170";
NODE_2560_length_974926_cov_31.233547	AUGUSTUS	stop_codon	273038	273040	.	+	0	transcript_id "g170.t1"; gene_id "g170";
NODE_2560_length_974926_cov_31.233547	AUGUSTUS	gene	278729	287030	0.47	+	.	g171
NODE_2560_length_974926_cov_31.233547	AUGUSTUS	transcript	278729	287030	0.47	+	.	g171.t1
NODE_2560_length_974926_cov_31.233547	AUGUSTUS	start_codon	278729	278731	.	+	0	transcript_id "g171.t1"; gene_id "g171";
NODE_2560_length_974926_cov_31.233547	AUGUSTUS	intron	278868	279016	1	+	.	transcript_id "g171.t1"; gene_id "g171";
NODE_2560_length_974926_cov_31.233547	AUGUSTUS	intron	279654	283609	0.5	+	.	transcript_id "g171.t1"; gene_id "g171";
NODE_2560_length_974926_cov_31.233547	AUGUSTUS	intron	283756	283845	0.53	+	.	transcript_id "g171.t1"; gene_id "g171";
NODE_2560_length_974926_cov_31.233547	AUGUSTUS	intron	283933	284011	0.96	+	.	transcript_id "g171.t1"; gene_id "g171";
NODE_2560_length_974926_cov_31.233547	AUGUSTUS	intron	284652	286888	1	+	.	transcript_id "g171.t1"; gene_id "g171";
NODE_2560_length_974926_cov_31.233547	AUGUSTUS	CDS	278729	278867	0.99	+	0	transcript_id "g171.t1"; gene_id "g171";
NODE_2560_length_974926_cov_31.233547	AUGUSTUS	CDS	279017	279653	0.92	+	2	transcript_id "g171.t1"; gene_id "g171";
NODE_2560_length_974926_cov_31.233547	AUGUSTUS	CDS	283610	283755	0.5	+	1	transcript_id "g171.t1"; gene_id "g171";
NODE_2560_length_974926_cov_31.233547	AUGUSTUS	CDS	283846	283932	0.54	+	2	transcript_id "g171.t1"; gene_id "g171";
NODE_2560_length_974926_cov_31.233547	AUGUSTUS	CDS	284012	284651	1	+	2	transcript_id "g171.t1"; gene_id "g171";
NODE_2560_length_974926_cov_31.233547	AUGUSTUS	CDS	286889	287030	1	+	1	transcript_id "g171.t1"; gene_id "g171";
NODE_2560_length_974926_cov_31.233547	AUGUSTUS	stop_codon	287028	287030	.	+	0	transcript_id "g171.t1"; gene_id "g171";
NODE_2560_length_974926_cov_31.233547	AUGUSTUS	gene	289956	293321	0.8	+	.	g172
NODE_2560_length_974926_cov_31.233547	AUGUSTUS	transcript	289956	293321	0.8	+	.	g172.t1
NODE_2560_length_974926_cov_31.233547	AUGUSTUS	start_codon	289956	289958	.	+	0	transcript_id "g172.t1"; gene_id "g172";
NODE_2560_length_974926_cov_31.233547	AUGUSTUS	intron	290092	290330	0.99	+	.	transcript_id "g172.t1"; gene_id "g172";
NODE_2560_length_974926_cov_31.233547	AUGUSTUS	intron	290937	292387	0.86	+	.	transcript_id "g172.t1"; gene_id "g172";
NODE_2560_length_974926_cov_31.233547	AUGUSTUS	intron	293025	293173	0.94	+	.	transcript_id "g172.t1"; gene_id "g172";
NODE_2560_length_974926_cov_31.233547	AUGUSTUS	CDS	289956	290091	0.99	+	0	transcript_id "g172.t1"; gene_id "g172";
NODE_2560_length_974926_cov_31.233547	AUGUSTUS	CDS	290331	290936	0.85	+	2	transcript_id "g172.t1"; gene_id "g172";
NODE_2560_length_974926_cov_31.233547	AUGUSTUS	CDS	292388	293024	0.94	+	2	transcript_id "g172.t1"; gene_id "g172";
NODE_2560_length_974926_cov_31.233547	AUGUSTUS	CDS	293174	293321	0.94	+	1	transcript_id "g172.t1"; gene_id "g172";
NODE_2560_length_974926_cov_31.233547	AUGUSTUS	stop_codon	293319	293321	.	+	0	transcript_id "g172.t1"; gene_id "g172";
NODE_2560_length_974926_cov_31.233547	AUGUSTUS	gene	294336	295774	0.93	-	.	g173
NODE_2560_length_974926_cov_31.233547	AUGUSTUS	transcript	294336	295774	0.93	-	.	g173.t1
NODE_2560_length_974926_cov_31.233547	AUGUSTUS	stop_codon	294336	294338	.	-	0	transcript_id "g173.t1"; gene_id "g173";
NODE_2560_length_974926_cov_31.233547	AUGUSTUS	intron	295686	295750	0.93	-	.	transcript_id "g173.t1"; gene_id "g173";
NODE_2560_length_974926_cov_31.233547	AUGUSTUS	CDS	294336	295685	0.95	-	0	transcript_id "g173.t1"; gene_id "g173";
NODE_2560_length_974926_cov_31.233547	AUGUSTUS	CDS	295751	295774	0.93	-	0	transcript_id "g173.t1"; gene_id "g173";
NODE_2560_length_974926_cov_31.233547	AUGUSTUS	start_codon	295772	295774	.	-	0	transcript_id "g173.t1"; gene_id "g173";
NODE_2560_length_974926_cov_31.233547	AUGUSTUS	gene	296460	297658	0.79	+	.	g174
NODE_2560_length_974926_cov_31.233547	AUGUSTUS	transcript	296460	297658	0.79	+	.	g174.t1
NODE_2560_length_974926_cov_31.233547	AUGUSTUS	start_codon	296460	296462	.	+	0	transcript_id "g174.t1"; gene_id "g174";
NODE_2560_length_974926_cov_31.233547	AUGUSTUS	intron	296485	296609	0.86	+	.	transcript_id "g174.t1"; gene_id "g174";
NODE_2560_length_974926_cov_31.233547	AUGUSTUS	intron	296743	296802	0.89	+	.	transcript_id "g174.t1"; gene_id "g174";
NODE_2560_length_974926_cov_31.233547	AUGUSTUS	CDS	296460	296484	0.85	+	0	transcript_id "g174.t1"; gene_id "g174";
NODE_2560_length_974926_cov_31.233547	AUGUSTUS	CDS	296610	296742	0.87	+	2	transcript_id "g174.t1"; gene_id "g174";
NODE_2560_length_974926_cov_31.233547	AUGUSTUS	CDS	296803	297658	0.85	+	1	transcript_id "g174.t1"; gene_id "g174";
NODE_2560_length_974926_cov_31.233547	AUGUSTUS	stop_codon	297656	297658	.	+	0	transcript_id "g174.t1"; gene_id "g174";
NODE_2560_length_974926_cov_31.233547	AUGUSTUS	gene	297833	300955	1	-	.	g175
NODE_2560_length_974926_cov_31.233547	AUGUSTUS	transcript	297833	300955	1	-	.	g175.t1
NODE_2560_length_974926_cov_31.233547	AUGUSTUS	stop_codon	297833	297835	.	-	0	transcript_id "g175.t1"; gene_id "g175";
NODE_2560_length_974926_cov_31.233547	AUGUSTUS	CDS	297833	300955	1	-	0	transcript_id "g175.t1"; gene_id "g175";
NODE_2560_length_974926_cov_31.233547	AUGUSTUS	start_codon	300953	300955	.	-	0	transcript_id "g175.t1"; gene_id "g175";
NODE_2560_length_974926_cov_31.233547	AUGUSTUS	gene	302179	303256	0.64	-	.	g176
NODE_2560_length_974926_cov_31.233547	AUGUSTUS	transcript	302179	303256	0.64	-	.	g176.t1
NODE_2560_length_974926_cov_31.233547	AUGUSTUS	stop_codon	302179	302181	.	-	0	transcript_id "g176.t1"; gene_id "g176";
NODE_2560_length_974926_cov_31.233547	AUGUSTUS	intron	302396	302477	1	-	.	transcript_id "g176.t1"; gene_id "g176";
NODE_2560_length_974926_cov_31.233547	AUGUSTUS	intron	302794	303003	0.71	-	.	transcript_id "g176.t1"; gene_id "g176";
NODE_2560_length_974926_cov_31.233547	AUGUSTUS	CDS	302179	302395	0.92	-	1	transcript_id "g176.t1"; gene_id "g176";
NODE_2560_length_974926_cov_31.233547	AUGUSTUS	CDS	302478	302793	0.71	-	2	transcript_id "g176.t1"; gene_id "g176";
NODE_2560_length_974926_cov_31.233547	AUGUSTUS	CDS	303004	303256	0.98	-	0	transcript_id "g176.t1"; gene_id "g176";
NODE_2560_length_974926_cov_31.233547	AUGUSTUS	start_codon	303254	303256	.	-	0	transcript_id "g176.t1"; gene_id "g176";
NODE_2560_length_974926_cov_31.233547	AUGUSTUS	gene	305243	307767	0.44	+	.	g177
NODE_2560_length_974926_cov_31.233547	AUGUSTUS	transcript	305243	307767	0.44	+	.	g177.t1
NODE_2560_length_974926_cov_31.233547	AUGUSTUS	start_codon	305243	305245	.	+	0	transcript_id "g177.t1"; gene_id "g177";
NODE_2560_length_974926_cov_31.233547	AUGUSTUS	intron	305322	307297	0.99	+	.	transcript_id "g177.t1"; gene_id "g177";
NODE_2560_length_974926_cov_31.233547	AUGUSTUS	intron	307684	307755	0.45	+	.	transcript_id "g177.t1"; gene_id "g177";
NODE_2560_length_974926_cov_31.233547	AUGUSTUS	CDS	305243	305321	0.99	+	0	transcript_id "g177.t1"; gene_id "g177";
NODE_2560_length_974926_cov_31.233547	AUGUSTUS	CDS	307298	307683	0.45	+	2	transcript_id "g177.t1"; gene_id "g177";
NODE_2560_length_974926_cov_31.233547	AUGUSTUS	CDS	307756	307767	0.45	+	0	transcript_id "g177.t1"; gene_id "g177";
NODE_2560_length_974926_cov_31.233547	AUGUSTUS	stop_codon	307765	307767	.	+	0	transcript_id "g177.t1"; gene_id "g177";
NODE_2560_length_974926_cov_31.233547	AUGUSTUS	gene	310616	319217	0.39	-	.	g178
NODE_2560_length_974926_cov_31.233547	AUGUSTUS	transcript	310616	319217	0.39	-	.	g178.t1
NODE_2560_length_974926_cov_31.233547	AUGUSTUS	stop_codon	310616	310618	.	-	0	transcript_id "g178.t1"; gene_id "g178";
NODE_2560_length_974926_cov_31.233547	AUGUSTUS	intron	310841	310916	1	-	.	transcript_id "g178.t1"; gene_id "g178";
NODE_2560_length_974926_cov_31.233547	AUGUSTUS	intron	311280	311357	1	-	.	transcript_id "g178.t1"; gene_id "g178";
NODE_2560_length_974926_cov_31.233547	AUGUSTUS	intron	311562	313172	0.59	-	.	transcript_id "g178.t1"; gene_id "g178";
NODE_2560_length_974926_cov_31.233547	AUGUSTUS	intron	313350	313907	0.94	-	.	transcript_id "g178.t1"; gene_id "g178";
NODE_2560_length_974926_cov_31.233547	AUGUSTUS	intron	314085	314195	1	-	.	transcript_id "g178.t1"; gene_id "g178";
NODE_2560_length_974926_cov_31.233547	AUGUSTUS	intron	315521	315603	1	-	.	transcript_id "g178.t1"; gene_id "g178";
NODE_2560_length_974926_cov_31.233547	AUGUSTUS	intron	316195	316276	1	-	.	transcript_id "g178.t1"; gene_id "g178";
NODE_2560_length_974926_cov_31.233547	AUGUSTUS	intron	317492	317560	1	-	.	transcript_id "g178.t1"; gene_id "g178";
NODE_2560_length_974926_cov_31.233547	AUGUSTUS	intron	318091	318981	1	-	.	transcript_id "g178.t1"; gene_id "g178";
NODE_2560_length_974926_cov_31.233547	AUGUSTUS	CDS	310616	310840	0.75	-	0	transcript_id "g178.t1"; gene_id "g178";
NODE_2560_length_974926_cov_31.233547	AUGUSTUS	CDS	310917	311279	1	-	0	transcript_id "g178.t1"; gene_id "g178";
NODE_2560_length_974926_cov_31.233547	AUGUSTUS	CDS	311358	311561	1	-	0	transcript_id "g178.t1"; gene_id "g178";
NODE_2560_length_974926_cov_31.233547	AUGUSTUS	CDS	313173	313349	0.58	-	0	transcript_id "g178.t1"; gene_id "g178";
NODE_2560_length_974926_cov_31.233547	AUGUSTUS	CDS	313908	314084	0.98	-	0	transcript_id "g178.t1"; gene_id "g178";
NODE_2560_length_974926_cov_31.233547	AUGUSTUS	CDS	314196	315520	1	-	2	transcript_id "g178.t1"; gene_id "g178";
NODE_2560_length_974926_cov_31.233547	AUGUSTUS	CDS	315604	316194	1	-	2	transcript_id "g178.t1"; gene_id "g178";
NODE_2560_length_974926_cov_31.233547	AUGUSTUS	CDS	316277	317491	1	-	2	transcript_id "g178.t1"; gene_id "g178";
NODE_2560_length_974926_cov_31.233547	AUGUSTUS	CDS	317561	318090	1	-	1	transcript_id "g178.t1"; gene_id "g178";
NODE_2560_length_974926_cov_31.233547	AUGUSTUS	CDS	318982	319217	0.85	-	0	transcript_id "g178.t1"; gene_id "g178";
NODE_2560_length_974926_cov_31.233547	AUGUSTUS	start_codon	319215	319217	.	-	0	transcript_id "g178.t1"; gene_id "g178";
NODE_2560_length_974926_cov_31.233547	AUGUSTUS	gene	344654	345729	0.43	+	.	g179
NODE_2560_length_974926_cov_31.233547	AUGUSTUS	transcript	344654	345729	0.43	+	.	g179.t1
NODE_2560_length_974926_cov_31.233547	AUGUSTUS	start_codon	344654	344656	.	+	0	transcript_id "g179.t1"; gene_id "g179";
NODE_2560_length_974926_cov_31.233547	AUGUSTUS	intron	345158	345417	1	+	.	transcript_id "g179.t1"; gene_id "g179";
NODE_2560_length_974926_cov_31.233547	AUGUSTUS	CDS	344654	345157	0.43	+	0	transcript_id "g179.t1"; gene_id "g179";
NODE_2560_length_974926_cov_31.233547	AUGUSTUS	CDS	345418	345729	0.99	+	0	transcript_id "g179.t1"; gene_id "g179";
NODE_2560_length_974926_cov_31.233547	AUGUSTUS	stop_codon	345727	345729	.	+	0	transcript_id "g179.t1"; gene_id "g179";
NODE_2560_length_974926_cov_31.233547	AUGUSTUS	gene	346563	349544	1	-	.	g180
NODE_2560_length_974926_cov_31.233547	AUGUSTUS	transcript	346563	349544	1	-	.	g180.t1
NODE_2560_length_974926_cov_31.233547	AUGUSTUS	stop_codon	346563	346565	.	-	0	transcript_id "g180.t1"; gene_id "g180";
NODE_2560_length_974926_cov_31.233547	AUGUSTUS	intron	346781	346864	1	-	.	transcript_id "g180.t1"; gene_id "g180";
NODE_2560_length_974926_cov_31.233547	AUGUSTUS	intron	347082	347167	1	-	.	transcript_id "g180.t1"; gene_id "g180";
NODE_2560_length_974926_cov_31.233547	AUGUSTUS	intron	347465	347566	1	-	.	transcript_id "g180.t1"; gene_id "g180";
NODE_2560_length_974926_cov_31.233547	AUGUSTUS	intron	347730	349182	1	-	.	transcript_id "g180.t1"; gene_id "g180";
NODE_2560_length_974926_cov_31.233547	AUGUSTUS	CDS	346563	346780	1	-	2	transcript_id "g180.t1"; gene_id "g180";
NODE_2560_length_974926_cov_31.233547	AUGUSTUS	CDS	346865	347081	1	-	0	transcript_id "g180.t1"; gene_id "g180";
NODE_2560_length_974926_cov_31.233547	AUGUSTUS	CDS	347168	347464	1	-	0	transcript_id "g180.t1"; gene_id "g180";
NODE_2560_length_974926_cov_31.233547	AUGUSTUS	CDS	347567	347729	1	-	1	transcript_id "g180.t1"; gene_id "g180";
NODE_2560_length_974926_cov_31.233547	AUGUSTUS	CDS	349183	349544	1	-	0	transcript_id "g180.t1"; gene_id "g180";
NODE_2560_length_974926_cov_31.233547	AUGUSTUS	start_codon	349542	349544	.	-	0	transcript_id "g180.t1"; gene_id "g180";
NODE_2560_length_974926_cov_31.233547	AUGUSTUS	gene	352720	354168	1	+	.	g181
NODE_2560_length_974926_cov_31.233547	AUGUSTUS	transcript	352720	354168	1	+	.	g181.t1
NODE_2560_length_974926_cov_31.233547	AUGUSTUS	start_codon	352720	352722	.	+	0	transcript_id "g181.t1"; gene_id "g181";
NODE_2560_length_974926_cov_31.233547	AUGUSTUS	intron	352920	352992	1	+	.	transcript_id "g181.t1"; gene_id "g181";
NODE_2560_length_974926_cov_31.233547	AUGUSTUS	intron	353158	353227	1	+	.	transcript_id "g181.t1"; gene_id "g181";
NODE_2560_length_974926_cov_31.233547	AUGUSTUS	intron	353397	353463	1	+	.	transcript_id "g181.t1"; gene_id "g181";
NODE_2560_length_974926_cov_31.233547	AUGUSTUS	CDS	352720	352919	1	+	0	transcript_id "g181.t1"; gene_id "g181";
NODE_2560_length_974926_cov_31.233547	AUGUSTUS	CDS	352993	353157	1	+	1	transcript_id "g181.t1"; gene_id "g181";
NODE_2560_length_974926_cov_31.233547	AUGUSTUS	CDS	353228	353396	1	+	1	transcript_id "g181.t1"; gene_id "g181";
NODE_2560_length_974926_cov_31.233547	AUGUSTUS	CDS	353464	354168	1	+	0	transcript_id "g181.t1"; gene_id "g181";
NODE_2560_length_974926_cov_31.233547	AUGUSTUS	stop_codon	354166	354168	.	+	0	transcript_id "g181.t1"; gene_id "g181";
NODE_2560_length_974926_cov_31.233547	AUGUSTUS	gene	354457	355551	0.67	-	.	g182
NODE_2560_length_974926_cov_31.233547	AUGUSTUS	transcript	354457	355551	0.67	-	.	g182.t1
NODE_2560_length_974926_cov_31.233547	AUGUSTUS	stop_codon	354457	354459	.	-	0	transcript_id "g182.t1"; gene_id "g182";
NODE_2560_length_974926_cov_31.233547	AUGUSTUS	intron	354607	354682	0.82	-	.	transcript_id "g182.t1"; gene_id "g182";
NODE_2560_length_974926_cov_31.233547	AUGUSTUS	intron	355143	355204	1	-	.	transcript_id "g182.t1"; gene_id "g182";
NODE_2560_length_974926_cov_31.233547	AUGUSTUS	CDS	354457	354606	0.78	-	0	transcript_id "g182.t1"; gene_id "g182";
NODE_2560_length_974926_cov_31.233547	AUGUSTUS	CDS	354683	355142	0.84	-	1	transcript_id "g182.t1"; gene_id "g182";
NODE_2560_length_974926_cov_31.233547	AUGUSTUS	CDS	355205	355551	0.99	-	0	transcript_id "g182.t1"; gene_id "g182";
NODE_2560_length_974926_cov_31.233547	AUGUSTUS	start_codon	355549	355551	.	-	0	transcript_id "g182.t1"; gene_id "g182";
NODE_2560_length_974926_cov_31.233547	AUGUSTUS	gene	356645	358005	0.99	-	.	g183
NODE_2560_length_974926_cov_31.233547	AUGUSTUS	transcript	356645	358005	0.99	-	.	g183.t1
NODE_2560_length_974926_cov_31.233547	AUGUSTUS	stop_codon	356645	356647	.	-	0	transcript_id "g183.t1"; gene_id "g183";
NODE_2560_length_974926_cov_31.233547	AUGUSTUS	intron	356818	356884	1	-	.	transcript_id "g183.t1"; gene_id "g183";
NODE_2560_length_974926_cov_31.233547	AUGUSTUS	intron	357399	357462	1	-	.	transcript_id "g183.t1"; gene_id "g183";
NODE_2560_length_974926_cov_31.233547	AUGUSTUS	CDS	356645	356817	0.99	-	2	transcript_id "g183.t1"; gene_id "g183";
NODE_2560_length_974926_cov_31.233547	AUGUSTUS	CDS	356885	357398	1	-	0	transcript_id "g183.t1"; gene_id "g183";
NODE_2560_length_974926_cov_31.233547	AUGUSTUS	CDS	357463	358005	1	-	0	transcript_id "g183.t1"; gene_id "g183";
NODE_2560_length_974926_cov_31.233547	AUGUSTUS	start_codon	358003	358005	.	-	0	transcript_id "g183.t1"; gene_id "g183";
NODE_2560_length_974926_cov_31.233547	AUGUSTUS	gene	359296	360632	0.9	+	.	g184
NODE_2560_length_974926_cov_31.233547	AUGUSTUS	transcript	359296	360632	0.9	+	.	g184.t1
NODE_2560_length_974926_cov_31.233547	AUGUSTUS	start_codon	359296	359298	.	+	0	transcript_id "g184.t1"; gene_id "g184";
NODE_2560_length_974926_cov_31.233547	AUGUSTUS	intron	359667	359980	0.96	+	.	transcript_id "g184.t1"; gene_id "g184";
NODE_2560_length_974926_cov_31.233547	AUGUSTUS	CDS	359296	359666	0.97	+	0	transcript_id "g184.t1"; gene_id "g184";
NODE_2560_length_974926_cov_31.233547	AUGUSTUS	CDS	359981	360632	0.91	+	1	transcript_id "g184.t1"; gene_id "g184";
NODE_2560_length_974926_cov_31.233547	AUGUSTUS	stop_codon	360630	360632	.	+	0	transcript_id "g184.t1"; gene_id "g184";
NODE_2560_length_974926_cov_31.233547	AUGUSTUS	gene	361362	362857	0.37	+	.	g185
NODE_2560_length_974926_cov_31.233547	AUGUSTUS	transcript	361362	362857	0.37	+	.	g185.t1
NODE_2560_length_974926_cov_31.233547	AUGUSTUS	start_codon	361362	361364	.	+	0	transcript_id "g185.t1"; gene_id "g185";
NODE_2560_length_974926_cov_31.233547	AUGUSTUS	intron	361790	362206	0.89	+	.	transcript_id "g185.t1"; gene_id "g185";
NODE_2560_length_974926_cov_31.233547	AUGUSTUS	intron	362617	362684	1	+	.	transcript_id "g185.t1"; gene_id "g185";
NODE_2560_length_974926_cov_31.233547	AUGUSTUS	CDS	361362	361789	0.45	+	0	transcript_id "g185.t1"; gene_id "g185";
NODE_2560_length_974926_cov_31.233547	AUGUSTUS	CDS	362207	362616	0.86	+	1	transcript_id "g185.t1"; gene_id "g185";
NODE_2560_length_974926_cov_31.233547	AUGUSTUS	CDS	362685	362857	1	+	2	transcript_id "g185.t1"; gene_id "g185";
NODE_2560_length_974926_cov_31.233547	AUGUSTUS	stop_codon	362855	362857	.	+	0	transcript_id "g185.t1"; gene_id "g185";
NODE_2560_length_974926_cov_31.233547	AUGUSTUS	gene	363758	372548	0.26	+	.	g186
NODE_2560_length_974926_cov_31.233547	AUGUSTUS	transcript	363758	372548	0.26	+	.	g186.t1
NODE_2560_length_974926_cov_31.233547	AUGUSTUS	start_codon	363758	363760	.	+	0	transcript_id "g186.t1"; gene_id "g186";
NODE_2560_length_974926_cov_31.233547	AUGUSTUS	intron	363829	363896	1	+	.	transcript_id "g186.t1"; gene_id "g186";
NODE_2560_length_974926_cov_31.233547	AUGUSTUS	intron	364060	366297	0.46	+	.	transcript_id "g186.t1"; gene_id "g186";
NODE_2560_length_974926_cov_31.233547	AUGUSTUS	intron	366651	366711	1	+	.	transcript_id "g186.t1"; gene_id "g186";
NODE_2560_length_974926_cov_31.233547	AUGUSTUS	intron	366875	368256	0.96	+	.	transcript_id "g186.t1"; gene_id "g186";
NODE_2560_length_974926_cov_31.233547	AUGUSTUS	intron	368649	368709	1	+	.	transcript_id "g186.t1"; gene_id "g186";
NODE_2560_length_974926_cov_31.233547	AUGUSTUS	intron	368873	368937	1	+	.	transcript_id "g186.t1"; gene_id "g186";
NODE_2560_length_974926_cov_31.233547	AUGUSTUS	intron	369015	371079	0.97	+	.	transcript_id "g186.t1"; gene_id "g186";
NODE_2560_length_974926_cov_31.233547	AUGUSTUS	intron	371582	371661	1	+	.	transcript_id "g186.t1"; gene_id "g186";
NODE_2560_length_974926_cov_31.233547	AUGUSTUS	intron	371956	372036	0.93	+	.	transcript_id "g186.t1"; gene_id "g186";
NODE_2560_length_974926_cov_31.233547	AUGUSTUS	intron	372254	372351	1	+	.	transcript_id "g186.t1"; gene_id "g186";
NODE_2560_length_974926_cov_31.233547	AUGUSTUS	CDS	363758	363828	0.64	+	0	transcript_id "g186.t1"; gene_id "g186";
NODE_2560_length_974926_cov_31.233547	AUGUSTUS	CDS	363897	364059	0.92	+	1	transcript_id "g186.t1"; gene_id "g186";
NODE_2560_length_974926_cov_31.233547	AUGUSTUS	CDS	366298	366650	0.46	+	0	transcript_id "g186.t1"; gene_id "g186";
NODE_2560_length_974926_cov_31.233547	AUGUSTUS	CDS	366712	366874	1	+	1	transcript_id "g186.t1"; gene_id "g186";
NODE_2560_length_974926_cov_31.233547	AUGUSTUS	CDS	368257	368648	0.96	+	0	transcript_id "g186.t1"; gene_id "g186";
NODE_2560_length_974926_cov_31.233547	AUGUSTUS	CDS	368710	368872	1	+	1	transcript_id "g186.t1"; gene_id "g186";
NODE_2560_length_974926_cov_31.233547	AUGUSTUS	CDS	368938	369014	1	+	0	transcript_id "g186.t1"; gene_id "g186";
NODE_2560_length_974926_cov_31.233547	AUGUSTUS	CDS	371080	371581	0.97	+	1	transcript_id "g186.t1"; gene_id "g186";
NODE_2560_length_974926_cov_31.233547	AUGUSTUS	CDS	371662	371955	0.93	+	0	transcript_id "g186.t1"; gene_id "g186";
NODE_2560_length_974926_cov_31.233547	AUGUSTUS	CDS	372037	372253	1	+	0	transcript_id "g186.t1"; gene_id "g186";
NODE_2560_length_974926_cov_31.233547	AUGUSTUS	CDS	372352	372548	1	+	2	transcript_id "g186.t1"; gene_id "g186";
NODE_2560_length_974926_cov_31.233547	AUGUSTUS	stop_codon	372546	372548	.	+	0	transcript_id "g186.t1"; gene_id "g186";
NODE_2560_length_974926_cov_31.233547	AUGUSTUS	gene	373114	376572	0.23	-	.	g187
NODE_2560_length_974926_cov_31.233547	AUGUSTUS	transcript	373114	376572	0.23	-	.	g187.t1
NODE_2560_length_974926_cov_31.233547	AUGUSTUS	stop_codon	373114	373116	.	-	0	transcript_id "g187.t1"; gene_id "g187";
NODE_2560_length_974926_cov_31.233547	AUGUSTUS	intron	373314	373383	1	-	.	transcript_id "g187.t1"; gene_id "g187";
NODE_2560_length_974926_cov_31.233547	AUGUSTUS	intron	374243	374316	0.97	-	.	transcript_id "g187.t1"; gene_id "g187";
NODE_2560_length_974926_cov_31.233547	AUGUSTUS	intron	374500	375253	0.4	-	.	transcript_id "g187.t1"; gene_id "g187";
NODE_2560_length_974926_cov_31.233547	AUGUSTUS	intron	375388	375510	1	-	.	transcript_id "g187.t1"; gene_id "g187";
NODE_2560_length_974926_cov_31.233547	AUGUSTUS	intron	375617	375681	1	-	.	transcript_id "g187.t1"; gene_id "g187";
NODE_2560_length_974926_cov_31.233547	AUGUSTUS	intron	376414	376500	0.83	-	.	transcript_id "g187.t1"; gene_id "g187";
NODE_2560_length_974926_cov_31.233547	AUGUSTUS	CDS	373114	373313	1	-	2	transcript_id "g187.t1"; gene_id "g187";
NODE_2560_length_974926_cov_31.233547	AUGUSTUS	CDS	373384	374242	0.97	-	0	transcript_id "g187.t1"; gene_id "g187";
NODE_2560_length_974926_cov_31.233547	AUGUSTUS	CDS	374317	374499	0.4	-	0	transcript_id "g187.t1"; gene_id "g187";
NODE_2560_length_974926_cov_31.233547	AUGUSTUS	CDS	375254	375387	0.54	-	2	transcript_id "g187.t1"; gene_id "g187";
NODE_2560_length_974926_cov_31.233547	AUGUSTUS	CDS	375511	375616	1	-	0	transcript_id "g187.t1"; gene_id "g187";
NODE_2560_length_974926_cov_31.233547	AUGUSTUS	CDS	375682	376413	0.83	-	0	transcript_id "g187.t1"; gene_id "g187";
NODE_2560_length_974926_cov_31.233547	AUGUSTUS	CDS	376501	376572	0.68	-	0	transcript_id "g187.t1"; gene_id "g187";
NODE_2560_length_974926_cov_31.233547	AUGUSTUS	start_codon	376570	376572	.	-	0	transcript_id "g187.t1"; gene_id "g187";
NODE_2560_length_974926_cov_31.233547	AUGUSTUS	gene	377411	378777	0.86	+	.	g188
NODE_2560_length_974926_cov_31.233547	AUGUSTUS	transcript	377411	378777	0.86	+	.	g188.t1
NODE_2560_length_974926_cov_31.233547	AUGUSTUS	start_codon	377411	377413	.	+	0	transcript_id "g188.t1"; gene_id "g188";
NODE_2560_length_974926_cov_31.233547	AUGUSTUS	intron	378074	378351	0.88	+	.	transcript_id "g188.t1"; gene_id "g188";
NODE_2560_length_974926_cov_31.233547	AUGUSTUS	CDS	377411	378073	0.86	+	0	transcript_id "g188.t1"; gene_id "g188";
NODE_2560_length_974926_cov_31.233547	AUGUSTUS	CDS	378352	378777	1	+	0	transcript_id "g188.t1"; gene_id "g188";
NODE_2560_length_974926_cov_31.233547	AUGUSTUS	stop_codon	378775	378777	.	+	0	transcript_id "g188.t1"; gene_id "g188";
NODE_2560_length_974926_cov_31.233547	AUGUSTUS	gene	379027	381737	0.98	-	.	g189
NODE_2560_length_974926_cov_31.233547	AUGUSTUS	transcript	379027	381737	0.98	-	.	g189.t1
NODE_2560_length_974926_cov_31.233547	AUGUSTUS	stop_codon	379027	379029	.	-	0	transcript_id "g189.t1"; gene_id "g189";
NODE_2560_length_974926_cov_31.233547	AUGUSTUS	intron	380743	380837	1	-	.	transcript_id "g189.t1"; gene_id "g189";
NODE_2560_length_974926_cov_31.233547	AUGUSTUS	intron	380988	381047	1	-	.	transcript_id "g189.t1"; gene_id "g189";
NODE_2560_length_974926_cov_31.233547	AUGUSTUS	CDS	379027	380742	0.99	-	0	transcript_id "g189.t1"; gene_id "g189";
NODE_2560_length_974926_cov_31.233547	AUGUSTUS	CDS	380838	380987	1	-	0	transcript_id "g189.t1"; gene_id "g189";
NODE_2560_length_974926_cov_31.233547	AUGUSTUS	CDS	381048	381737	0.99	-	0	transcript_id "g189.t1"; gene_id "g189";
NODE_2560_length_974926_cov_31.233547	AUGUSTUS	start_codon	381735	381737	.	-	0	transcript_id "g189.t1"; gene_id "g189";
NODE_2560_length_974926_cov_31.233547	AUGUSTUS	gene	382970	385948	0.42	-	.	g190
NODE_2560_length_974926_cov_31.233547	AUGUSTUS	transcript	382970	385948	0.42	-	.	g190.t1
NODE_2560_length_974926_cov_31.233547	AUGUSTUS	stop_codon	382970	382972	.	-	0	transcript_id "g190.t1"; gene_id "g190";
NODE_2560_length_974926_cov_31.233547	AUGUSTUS	intron	384686	384785	0.71	-	.	transcript_id "g190.t1"; gene_id "g190";
NODE_2560_length_974926_cov_31.233547	AUGUSTUS	intron	384936	385237	0.95	-	.	transcript_id "g190.t1"; gene_id "g190";
NODE_2560_length_974926_cov_31.233547	AUGUSTUS	CDS	382970	384685	0.73	-	0	transcript_id "g190.t1"; gene_id "g190";
NODE_2560_length_974926_cov_31.233547	AUGUSTUS	CDS	384786	384935	0.95	-	0	transcript_id "g190.t1"; gene_id "g190";
NODE_2560_length_974926_cov_31.233547	AUGUSTUS	CDS	385238	385948	0.56	-	0	transcript_id "g190.t1"; gene_id "g190";
NODE_2560_length_974926_cov_31.233547	AUGUSTUS	start_codon	385946	385948	.	-	0	transcript_id "g190.t1"; gene_id "g190";
NODE_2560_length_974926_cov_31.233547	AUGUSTUS	gene	387881	389289	0.54	+	.	g191
NODE_2560_length_974926_cov_31.233547	AUGUSTUS	transcript	387881	389289	0.54	+	.	g191.t1
NODE_2560_length_974926_cov_31.233547	AUGUSTUS	start_codon	387881	387883	.	+	0	transcript_id "g191.t1"; gene_id "g191";
NODE_2560_length_974926_cov_31.233547	AUGUSTUS	intron	388269	388411	0.96	+	.	transcript_id "g191.t1"; gene_id "g191";
NODE_2560_length_974926_cov_31.233547	AUGUSTUS	CDS	387881	388268	0.54	+	0	transcript_id "g191.t1"; gene_id "g191";
NODE_2560_length_974926_cov_31.233547	AUGUSTUS	CDS	388412	389289	0.96	+	2	transcript_id "g191.t1"; gene_id "g191";
NODE_2560_length_974926_cov_31.233547	AUGUSTUS	stop_codon	389287	389289	.	+	0	transcript_id "g191.t1"; gene_id "g191";
NODE_2560_length_974926_cov_31.233547	AUGUSTUS	gene	390872	395541	0.91	-	.	g192
NODE_2560_length_974926_cov_31.233547	AUGUSTUS	transcript	390872	395541	0.91	-	.	g192.t1
NODE_2560_length_974926_cov_31.233547	AUGUSTUS	stop_codon	390872	390874	.	-	0	transcript_id "g192.t1"; gene_id "g192";
NODE_2560_length_974926_cov_31.233547	AUGUSTUS	intron	391678	395423	0.99	-	.	transcript_id "g192.t1"; gene_id "g192";
NODE_2560_length_974926_cov_31.233547	AUGUSTUS	CDS	390872	391677	1	-	2	transcript_id "g192.t1"; gene_id "g192";
NODE_2560_length_974926_cov_31.233547	AUGUSTUS	CDS	395424	395541	0.91	-	0	transcript_id "g192.t1"; gene_id "g192";
NODE_2560_length_974926_cov_31.233547	AUGUSTUS	start_codon	395539	395541	.	-	0	transcript_id "g192.t1"; gene_id "g192";
NODE_2560_length_974926_cov_31.233547	AUGUSTUS	gene	403938	413255	0.41	-	.	g193
NODE_2560_length_974926_cov_31.233547	AUGUSTUS	transcript	403938	413255	0.41	-	.	g193.t1
NODE_2560_length_974926_cov_31.233547	AUGUSTUS	stop_codon	403938	403940	.	-	0	transcript_id "g193.t1"; gene_id "g193";
NODE_2560_length_974926_cov_31.233547	AUGUSTUS	intron	404520	405002	0.53	-	.	transcript_id "g193.t1"; gene_id "g193";
NODE_2560_length_974926_cov_31.233547	AUGUSTUS	intron	405119	405213	1	-	.	transcript_id "g193.t1"; gene_id "g193";
NODE_2560_length_974926_cov_31.233547	AUGUSTUS	intron	405290	405404	0.95	-	.	transcript_id "g193.t1"; gene_id "g193";
NODE_2560_length_974926_cov_31.233547	AUGUSTUS	intron	405958	406050	1	-	.	transcript_id "g193.t1"; gene_id "g193";
NODE_2560_length_974926_cov_31.233547	AUGUSTUS	intron	406156	406662	0.9	-	.	transcript_id "g193.t1"; gene_id "g193";
NODE_2560_length_974926_cov_31.233547	AUGUSTUS	intron	406886	406969	1	-	.	transcript_id "g193.t1"; gene_id "g193";
NODE_2560_length_974926_cov_31.233547	AUGUSTUS	intron	407294	409352	0.99	-	.	transcript_id "g193.t1"; gene_id "g193";
NODE_2560_length_974926_cov_31.233547	AUGUSTUS	intron	409514	409589	1	-	.	transcript_id "g193.t1"; gene_id "g193";
NODE_2560_length_974926_cov_31.233547	AUGUSTUS	intron	410019	411279	1	-	.	transcript_id "g193.t1"; gene_id "g193";
NODE_2560_length_974926_cov_31.233547	AUGUSTUS	CDS	403938	404519	0.93	-	0	transcript_id "g193.t1"; gene_id "g193";
NODE_2560_length_974926_cov_31.233547	AUGUSTUS	CDS	405003	405118	0.53	-	2	transcript_id "g193.t1"; gene_id "g193";
NODE_2560_length_974926_cov_31.233547	AUGUSTUS	CDS	405214	405289	1	-	0	transcript_id "g193.t1"; gene_id "g193";
NODE_2560_length_974926_cov_31.233547	AUGUSTUS	CDS	405405	405957	0.95	-	1	transcript_id "g193.t1"; gene_id "g193";
NODE_2560_length_974926_cov_31.233547	AUGUSTUS	CDS	406051	406155	0.9	-	1	transcript_id "g193.t1"; gene_id "g193";
NODE_2560_length_974926_cov_31.233547	AUGUSTUS	CDS	406663	406885	1	-	2	transcript_id "g193.t1"; gene_id "g193";
NODE_2560_length_974926_cov_31.233547	AUGUSTUS	CDS	406970	407293	1	-	2	transcript_id "g193.t1"; gene_id "g193";
NODE_2560_length_974926_cov_31.233547	AUGUSTUS	CDS	409353	409513	1	-	1	transcript_id "g193.t1"; gene_id "g193";
NODE_2560_length_974926_cov_31.233547	AUGUSTUS	CDS	409590	410018	1	-	1	transcript_id "g193.t1"; gene_id "g193";
NODE_2560_length_974926_cov_31.233547	AUGUSTUS	CDS	411280	413255	1	-	0	transcript_id "g193.t1"; gene_id "g193";
NODE_2560_length_974926_cov_31.233547	AUGUSTUS	start_codon	413253	413255	.	-	0	transcript_id "g193.t1"; gene_id "g193";
NODE_2560_length_974926_cov_31.233547	AUGUSTUS	gene	429718	437694	0.45	+	.	g194
NODE_2560_length_974926_cov_31.233547	AUGUSTUS	transcript	429718	437694	0.45	+	.	g194.t1
NODE_2560_length_974926_cov_31.233547	AUGUSTUS	start_codon	429718	429720	.	+	0	transcript_id "g194.t1"; gene_id "g194";
NODE_2560_length_974926_cov_31.233547	AUGUSTUS	intron	430365	430437	1	+	.	transcript_id "g194.t1"; gene_id "g194";
NODE_2560_length_974926_cov_31.233547	AUGUSTUS	intron	430733	434701	0.91	+	.	transcript_id "g194.t1"; gene_id "g194";
NODE_2560_length_974926_cov_31.233547	AUGUSTUS	intron	434816	437532	0.91	+	.	transcript_id "g194.t1"; gene_id "g194";
NODE_2560_length_974926_cov_31.233547	AUGUSTUS	CDS	429718	430364	0.99	+	0	transcript_id "g194.t1"; gene_id "g194";
NODE_2560_length_974926_cov_31.233547	AUGUSTUS	CDS	430438	430732	1	+	1	transcript_id "g194.t1"; gene_id "g194";
NODE_2560_length_974926_cov_31.233547	AUGUSTUS	CDS	434702	434815	0.91	+	0	transcript_id "g194.t1"; gene_id "g194";
NODE_2560_length_974926_cov_31.233547	AUGUSTUS	CDS	437533	437694	0.47	+	0	transcript_id "g194.t1"; gene_id "g194";
NODE_2560_length_974926_cov_31.233547	AUGUSTUS	stop_codon	437692	437694	.	+	0	transcript_id "g194.t1"; gene_id "g194";
NODE_2560_length_974926_cov_31.233547	AUGUSTUS	gene	452256	452474	0.52	+	.	g195
NODE_2560_length_974926_cov_31.233547	AUGUSTUS	transcript	452256	452474	0.52	+	.	g195.t1
NODE_2560_length_974926_cov_31.233547	AUGUSTUS	start_codon	452256	452258	.	+	0	transcript_id "g195.t1"; gene_id "g195";
NODE_2560_length_974926_cov_31.233547	AUGUSTUS	CDS	452256	452474	0.52	+	0	transcript_id "g195.t1"; gene_id "g195";
NODE_2560_length_974926_cov_31.233547	AUGUSTUS	stop_codon	452472	452474	.	+	0	transcript_id "g195.t1"; gene_id "g195";
NODE_2560_length_974926_cov_31.233547	AUGUSTUS	gene	469265	477308	0.53	-	.	g196
NODE_2560_length_974926_cov_31.233547	AUGUSTUS	transcript	469265	477308	0.53	-	.	g196.t1
NODE_2560_length_974926_cov_31.233547	AUGUSTUS	stop_codon	469265	469267	.	-	0	transcript_id "g196.t1"; gene_id "g196";
NODE_2560_length_974926_cov_31.233547	AUGUSTUS	intron	469514	477110	0.65	-	.	transcript_id "g196.t1"; gene_id "g196";
NODE_2560_length_974926_cov_31.233547	AUGUSTUS	CDS	469265	469513	0.99	-	0	transcript_id "g196.t1"; gene_id "g196";
NODE_2560_length_974926_cov_31.233547	AUGUSTUS	CDS	477111	477308	0.58	-	0	transcript_id "g196.t1"; gene_id "g196";
NODE_2560_length_974926_cov_31.233547	AUGUSTUS	start_codon	477306	477308	.	-	0	transcript_id "g196.t1"; gene_id "g196";
NODE_2560_length_974926_cov_31.233547	AUGUSTUS	gene	486054	486254	0.63	-	.	g197
NODE_2560_length_974926_cov_31.233547	AUGUSTUS	transcript	486054	486254	0.63	-	.	g197.t1
NODE_2560_length_974926_cov_31.233547	AUGUSTUS	stop_codon	486054	486056	.	-	0	transcript_id "g197.t1"; gene_id "g197";
NODE_2560_length_974926_cov_31.233547	AUGUSTUS	CDS	486054	486254	0.63	-	0	transcript_id "g197.t1"; gene_id "g197";
NODE_2560_length_974926_cov_31.233547	AUGUSTUS	start_codon	486252	486254	.	-	0	transcript_id "g197.t1"; gene_id "g197";
NODE_2560_length_974926_cov_31.233547	AUGUSTUS	gene	492612	493130	0.56	-	.	g198
NODE_2560_length_974926_cov_31.233547	AUGUSTUS	transcript	492612	493130	0.56	-	.	g198.t1
NODE_2560_length_974926_cov_31.233547	AUGUSTUS	stop_codon	492612	492614	.	-	0	transcript_id "g198.t1"; gene_id "g198";
NODE_2560_length_974926_cov_31.233547	AUGUSTUS	CDS	492612	493130	0.56	-	0	transcript_id "g198.t1"; gene_id "g198";
NODE_2560_length_974926_cov_31.233547	AUGUSTUS	start_codon	493128	493130	.	-	0	transcript_id "g198.t1"; gene_id "g198";
NODE_2560_length_974926_cov_31.233547	AUGUSTUS	gene	500215	520617	0.16	+	.	g199
NODE_2560_length_974926_cov_31.233547	AUGUSTUS	transcript	500215	520617	0.16	+	.	g199.t1
NODE_2560_length_974926_cov_31.233547	AUGUSTUS	start_codon	500215	500217	.	+	0	transcript_id "g199.t1"; gene_id "g199";
NODE_2560_length_974926_cov_31.233547	AUGUSTUS	intron	500266	500817	0.49	+	.	transcript_id "g199.t1"; gene_id "g199";
NODE_2560_length_974926_cov_31.233547	AUGUSTUS	intron	501145	501236	1	+	.	transcript_id "g199.t1"; gene_id "g199";
NODE_2560_length_974926_cov_31.233547	AUGUSTUS	intron	501699	501781	0.97	+	.	transcript_id "g199.t1"; gene_id "g199";
NODE_2560_length_974926_cov_31.233547	AUGUSTUS	intron	501938	510754	0.98	+	.	transcript_id "g199.t1"; gene_id "g199";
NODE_2560_length_974926_cov_31.233547	AUGUSTUS	intron	513176	513250	1	+	.	transcript_id "g199.t1"; gene_id "g199";
NODE_2560_length_974926_cov_31.233547	AUGUSTUS	intron	513383	517212	0.34	+	.	transcript_id "g199.t1"; gene_id "g199";
NODE_2560_length_974926_cov_31.233547	AUGUSTUS	intron	519782	519850	0.9	+	.	transcript_id "g199.t1"; gene_id "g199";
NODE_2560_length_974926_cov_31.233547	AUGUSTUS	intron	520384	520443	1	+	.	transcript_id "g199.t1"; gene_id "g199";
NODE_2560_length_974926_cov_31.233547	AUGUSTUS	CDS	500215	500265	0.49	+	0	transcript_id "g199.t1"; gene_id "g199";
NODE_2560_length_974926_cov_31.233547	AUGUSTUS	CDS	500818	501144	0.96	+	0	transcript_id "g199.t1"; gene_id "g199";
NODE_2560_length_974926_cov_31.233547	AUGUSTUS	CDS	501237	501698	1	+	0	transcript_id "g199.t1"; gene_id "g199";
NODE_2560_length_974926_cov_31.233547	AUGUSTUS	CDS	501782	501937	0.97	+	0	transcript_id "g199.t1"; gene_id "g199";
NODE_2560_length_974926_cov_31.233547	AUGUSTUS	CDS	510755	513175	1	+	0	transcript_id "g199.t1"; gene_id "g199";
NODE_2560_length_974926_cov_31.233547	AUGUSTUS	CDS	513251	513382	1	+	0	transcript_id "g199.t1"; gene_id "g199";
NODE_2560_length_974926_cov_31.233547	AUGUSTUS	CDS	517213	519781	0.34	+	0	transcript_id "g199.t1"; gene_id "g199";
NODE_2560_length_974926_cov_31.233547	AUGUSTUS	CDS	519851	520383	0.89	+	2	transcript_id "g199.t1"; gene_id "g199";
NODE_2560_length_974926_cov_31.233547	AUGUSTUS	CDS	520444	520617	1	+	0	transcript_id "g199.t1"; gene_id "g199";
NODE_2560_length_974926_cov_31.233547	AUGUSTUS	stop_codon	520615	520617	.	+	0	transcript_id "g199.t1"; gene_id "g199";
NODE_2560_length_974926_cov_31.233547	AUGUSTUS	gene	521029	521995	0.62	-	.	g200
NODE_2560_length_974926_cov_31.233547	AUGUSTUS	transcript	521029	521995	0.62	-	.	g200.t1
NODE_2560_length_974926_cov_31.233547	AUGUSTUS	stop_codon	521029	521031	.	-	0	transcript_id "g200.t1"; gene_id "g200";
NODE_2560_length_974926_cov_31.233547	AUGUSTUS	intron	521184	521264	1	-	.	transcript_id "g200.t1"; gene_id "g200";
NODE_2560_length_974926_cov_31.233547	AUGUSTUS	intron	521372	521642	0.66	-	.	transcript_id "g200.t1"; gene_id "g200";
NODE_2560_length_974926_cov_31.233547	AUGUSTUS	CDS	521029	521183	0.94	-	2	transcript_id "g200.t1"; gene_id "g200";
NODE_2560_length_974926_cov_31.233547	AUGUSTUS	CDS	521265	521371	0.66	-	1	transcript_id "g200.t1"; gene_id "g200";
NODE_2560_length_974926_cov_31.233547	AUGUSTUS	CDS	521643	521995	0.84	-	0	transcript_id "g200.t1"; gene_id "g200";
NODE_2560_length_974926_cov_31.233547	AUGUSTUS	start_codon	521993	521995	.	-	0	transcript_id "g200.t1"; gene_id "g200";
NODE_2560_length_974926_cov_31.233547	AUGUSTUS	gene	522884	525995	0.24	-	.	g201
NODE_2560_length_974926_cov_31.233547	AUGUSTUS	transcript	522884	525995	0.24	-	.	g201.t1
NODE_2560_length_974926_cov_31.233547	AUGUSTUS	stop_codon	522884	522886	.	-	0	transcript_id "g201.t1"; gene_id "g201";
NODE_2560_length_974926_cov_31.233547	AUGUSTUS	intron	524663	525055	0.89	-	.	transcript_id "g201.t1"; gene_id "g201";
NODE_2560_length_974926_cov_31.233547	AUGUSTUS	intron	525178	525259	1	-	.	transcript_id "g201.t1"; gene_id "g201";
NODE_2560_length_974926_cov_31.233547	AUGUSTUS	intron	525516	525887	0.47	-	.	transcript_id "g201.t1"; gene_id "g201";
NODE_2560_length_974926_cov_31.233547	AUGUSTUS	CDS	522884	524662	0.98	-	0	transcript_id "g201.t1"; gene_id "g201";
NODE_2560_length_974926_cov_31.233547	AUGUSTUS	CDS	525056	525177	0.89	-	2	transcript_id "g201.t1"; gene_id "g201";
NODE_2560_length_974926_cov_31.233547	AUGUSTUS	CDS	525260	525515	1	-	0	transcript_id "g201.t1"; gene_id "g201";
NODE_2560_length_974926_cov_31.233547	AUGUSTUS	CDS	525888	525995	0.28	-	0	transcript_id "g201.t1"; gene_id "g201";
NODE_2560_length_974926_cov_31.233547	AUGUSTUS	start_codon	525993	525995	.	-	0	transcript_id "g201.t1"; gene_id "g201";
NODE_2560_length_974926_cov_31.233547	AUGUSTUS	gene	527266	543174	0.04	+	.	g202
NODE_2560_length_974926_cov_31.233547	AUGUSTUS	transcript	527266	543174	0.04	+	.	g202.t1
NODE_2560_length_974926_cov_31.233547	AUGUSTUS	start_codon	527266	527268	.	+	0	transcript_id "g202.t1"; gene_id "g202";
NODE_2560_length_974926_cov_31.233547	AUGUSTUS	intron	527432	530092	0.16	+	.	transcript_id "g202.t1"; gene_id "g202";
NODE_2560_length_974926_cov_31.233547	AUGUSTUS	intron	530220	530289	0.56	+	.	transcript_id "g202.t1"; gene_id "g202";
NODE_2560_length_974926_cov_31.233547	AUGUSTUS	intron	530681	530966	0.69	+	.	transcript_id "g202.t1"; gene_id "g202";
NODE_2560_length_974926_cov_31.233547	AUGUSTUS	intron	531127	540021	0.31	+	.	transcript_id "g202.t1"; gene_id "g202";
NODE_2560_length_974926_cov_31.233547	AUGUSTUS	intron	540080	543023	0.33	+	.	transcript_id "g202.t1"; gene_id "g202";
NODE_2560_length_974926_cov_31.233547	AUGUSTUS	CDS	527266	527431	0.38	+	0	transcript_id "g202.t1"; gene_id "g202";
NODE_2560_length_974926_cov_31.233547	AUGUSTUS	CDS	530093	530219	0.17	+	2	transcript_id "g202.t1"; gene_id "g202";
NODE_2560_length_974926_cov_31.233547	AUGUSTUS	CDS	530290	530680	0.4	+	1	transcript_id "g202.t1"; gene_id "g202";
NODE_2560_length_974926_cov_31.233547	AUGUSTUS	CDS	530967	531126	0.62	+	0	transcript_id "g202.t1"; gene_id "g202";
NODE_2560_length_974926_cov_31.233547	AUGUSTUS	CDS	540022	540079	0.31	+	2	transcript_id "g202.t1"; gene_id "g202";
NODE_2560_length_974926_cov_31.233547	AUGUSTUS	CDS	543024	543174	0.9	+	1	transcript_id "g202.t1"; gene_id "g202";
NODE_2560_length_974926_cov_31.233547	AUGUSTUS	stop_codon	543172	543174	.	+	0	transcript_id "g202.t1"; gene_id "g202";
NODE_2560_length_974926_cov_31.233547	AUGUSTUS	gene	550137	553922	0.24	-	.	g203
NODE_2560_length_974926_cov_31.233547	AUGUSTUS	transcript	550137	553922	0.24	-	.	g203.t1
NODE_2560_length_974926_cov_31.233547	AUGUSTUS	stop_codon	550137	550139	.	-	0	transcript_id "g203.t1"; gene_id "g203";
NODE_2560_length_974926_cov_31.233547	AUGUSTUS	intron	550260	553823	0.25	-	.	transcript_id "g203.t1"; gene_id "g203";
NODE_2560_length_974926_cov_31.233547	AUGUSTUS	CDS	550137	550259	0.25	-	0	transcript_id "g203.t1"; gene_id "g203";
NODE_2560_length_974926_cov_31.233547	AUGUSTUS	CDS	553824	553922	0.83	-	0	transcript_id "g203.t1"; gene_id "g203";
NODE_2560_length_974926_cov_31.233547	AUGUSTUS	start_codon	553920	553922	.	-	0	transcript_id "g203.t1"; gene_id "g203";
NODE_2560_length_974926_cov_31.233547	AUGUSTUS	gene	562618	564681	0.95	-	.	g204
NODE_2560_length_974926_cov_31.233547	AUGUSTUS	transcript	562618	564681	0.95	-	.	g204.t1
NODE_2560_length_974926_cov_31.233547	AUGUSTUS	stop_codon	562618	562620	.	-	0	transcript_id "g204.t1"; gene_id "g204";
NODE_2560_length_974926_cov_31.233547	AUGUSTUS	intron	564102	564180	1	-	.	transcript_id "g204.t1"; gene_id "g204";
NODE_2560_length_974926_cov_31.233547	AUGUSTUS	intron	564415	564500	0.99	-	.	transcript_id "g204.t1"; gene_id "g204";
NODE_2560_length_974926_cov_31.233547	AUGUSTUS	CDS	562618	564101	1	-	2	transcript_id "g204.t1"; gene_id "g204";
NODE_2560_length_974926_cov_31.233547	AUGUSTUS	CDS	564181	564414	0.99	-	2	transcript_id "g204.t1"; gene_id "g204";
NODE_2560_length_974926_cov_31.233547	AUGUSTUS	CDS	564501	564681	0.96	-	0	transcript_id "g204.t1"; gene_id "g204";
NODE_2560_length_974926_cov_31.233547	AUGUSTUS	start_codon	564679	564681	.	-	0	transcript_id "g204.t1"; gene_id "g204";
NODE_2560_length_974926_cov_31.233547	AUGUSTUS	gene	568597	569697	0.69	-	.	g205
NODE_2560_length_974926_cov_31.233547	AUGUSTUS	transcript	568597	569697	0.69	-	.	g205.t1
NODE_2560_length_974926_cov_31.233547	AUGUSTUS	stop_codon	568597	568599	.	-	0	transcript_id "g205.t1"; gene_id "g205";
NODE_2560_length_974926_cov_31.233547	AUGUSTUS	CDS	568597	569697	0.69	-	0	transcript_id "g205.t1"; gene_id "g205";
NODE_2560_length_974926_cov_31.233547	AUGUSTUS	start_codon	569695	569697	.	-	0	transcript_id "g205.t1"; gene_id "g205";
NODE_2560_length_974926_cov_31.233547	AUGUSTUS	gene	572272	576100	0.3	+	.	g206
NODE_2560_length_974926_cov_31.233547	AUGUSTUS	transcript	572272	576100	0.3	+	.	g206.t1
NODE_2560_length_974926_cov_31.233547	AUGUSTUS	start_codon	572272	572274	.	+	0	transcript_id "g206.t1"; gene_id "g206";
NODE_2560_length_974926_cov_31.233547	AUGUSTUS	intron	572393	572477	1	+	.	transcript_id "g206.t1"; gene_id "g206";
NODE_2560_length_974926_cov_31.233547	AUGUSTUS	intron	572576	572923	0.99	+	.	transcript_id "g206.t1"; gene_id "g206";
NODE_2560_length_974926_cov_31.233547	AUGUSTUS	intron	573046	573127	1	+	.	transcript_id "g206.t1"; gene_id "g206";
NODE_2560_length_974926_cov_31.233547	AUGUSTUS	intron	573394	573483	0.9	+	.	transcript_id "g206.t1"; gene_id "g206";
NODE_2560_length_974926_cov_31.233547	AUGUSTUS	intron	573903	574007	1	+	.	transcript_id "g206.t1"; gene_id "g206";
NODE_2560_length_974926_cov_31.233547	AUGUSTUS	intron	574524	574791	1	+	.	transcript_id "g206.t1"; gene_id "g206";
NODE_2560_length_974926_cov_31.233547	AUGUSTUS	intron	574988	575058	0.99	+	.	transcript_id "g206.t1"; gene_id "g206";
NODE_2560_length_974926_cov_31.233547	AUGUSTUS	intron	575152	575240	0.99	+	.	transcript_id "g206.t1"; gene_id "g206";
NODE_2560_length_974926_cov_31.233547	AUGUSTUS	intron	575316	575648	0.62	+	.	transcript_id "g206.t1"; gene_id "g206";
NODE_2560_length_974926_cov_31.233547	AUGUSTUS	CDS	572272	572392	0.59	+	0	transcript_id "g206.t1"; gene_id "g206";
NODE_2560_length_974926_cov_31.233547	AUGUSTUS	CDS	572478	572575	1	+	2	transcript_id "g206.t1"; gene_id "g206";
NODE_2560_length_974926_cov_31.233547	AUGUSTUS	CDS	572924	573045	0.99	+	0	transcript_id "g206.t1"; gene_id "g206";
NODE_2560_length_974926_cov_31.233547	AUGUSTUS	CDS	573128	573393	0.9	+	1	transcript_id "g206.t1"; gene_id "g206";
NODE_2560_length_974926_cov_31.233547	AUGUSTUS	CDS	573484	573902	1	+	2	transcript_id "g206.t1"; gene_id "g206";
NODE_2560_length_974926_cov_31.233547	AUGUSTUS	CDS	574008	574523	1	+	0	transcript_id "g206.t1"; gene_id "g206";
NODE_2560_length_974926_cov_31.233547	AUGUSTUS	CDS	574792	574987	0.99	+	0	transcript_id "g206.t1"; gene_id "g206";
NODE_2560_length_974926_cov_31.233547	AUGUSTUS	CDS	575059	575151	0.99	+	2	transcript_id "g206.t1"; gene_id "g206";
NODE_2560_length_974926_cov_31.233547	AUGUSTUS	CDS	575241	575315	1	+	2	transcript_id "g206.t1"; gene_id "g206";
NODE_2560_length_974926_cov_31.233547	AUGUSTUS	CDS	575649	576100	0.8	+	2	transcript_id "g206.t1"; gene_id "g206";
NODE_2560_length_974926_cov_31.233547	AUGUSTUS	stop_codon	576098	576100	.	+	0	transcript_id "g206.t1"; gene_id "g206";
NODE_2560_length_974926_cov_31.233547	AUGUSTUS	gene	581877	582382	0.57	+	.	g207
NODE_2560_length_974926_cov_31.233547	AUGUSTUS	transcript	581877	582382	0.57	+	.	g207.t1
NODE_2560_length_974926_cov_31.233547	AUGUSTUS	start_codon	581877	581879	.	+	0	transcript_id "g207.t1"; gene_id "g207";
NODE_2560_length_974926_cov_31.233547	AUGUSTUS	intron	581897	581967	0.97	+	.	transcript_id "g207.t1"; gene_id "g207";
NODE_2560_length_974926_cov_31.233547	AUGUSTUS	intron	582157	582222	0.6	+	.	transcript_id "g207.t1"; gene_id "g207";
NODE_2560_length_974926_cov_31.233547	AUGUSTUS	CDS	581877	581896	0.96	+	0	transcript_id "g207.t1"; gene_id "g207";
NODE_2560_length_974926_cov_31.233547	AUGUSTUS	CDS	581968	582156	0.61	+	1	transcript_id "g207.t1"; gene_id "g207";
NODE_2560_length_974926_cov_31.233547	AUGUSTUS	CDS	582223	582382	0.6	+	1	transcript_id "g207.t1"; gene_id "g207";
NODE_2560_length_974926_cov_31.233547	AUGUSTUS	stop_codon	582380	582382	.	+	0	transcript_id "g207.t1"; gene_id "g207";
NODE_2560_length_974926_cov_31.233547	AUGUSTUS	gene	583334	631132	0.89	-	.	g208
NODE_2560_length_974926_cov_31.233547	AUGUSTUS	transcript	583334	631132	0.89	-	.	g208.t1
NODE_2560_length_974926_cov_31.233547	AUGUSTUS	stop_codon	583334	583336	.	-	0	transcript_id "g208.t1"; gene_id "g208";
NODE_2560_length_974926_cov_31.233547	AUGUSTUS	intron	583625	583694	1	-	.	transcript_id "g208.t1"; gene_id "g208";
NODE_2560_length_974926_cov_31.233547	AUGUSTUS	intron	583866	583933	1	-	.	transcript_id "g208.t1"; gene_id "g208";
NODE_2560_length_974926_cov_31.233547	AUGUSTUS	intron	584065	584144	0.99	-	.	transcript_id "g208.t1"; gene_id "g208";
NODE_2560_length_974926_cov_31.233547	AUGUSTUS	intron	584660	585046	1	-	.	transcript_id "g208.t1"; gene_id "g208";
NODE_2560_length_974926_cov_31.233547	AUGUSTUS	intron	587837	588913	1	-	.	transcript_id "g208.t1"; gene_id "g208";
NODE_2560_length_974926_cov_31.233547	AUGUSTUS	intron	589396	594165	1	-	.	transcript_id "g208.t1"; gene_id "g208";
NODE_2560_length_974926_cov_31.233547	AUGUSTUS	intron	594400	605503	0.93	-	.	transcript_id "g208.t1"; gene_id "g208";
NODE_2560_length_974926_cov_31.233547	AUGUSTUS	intron	605731	631008	0.94	-	.	transcript_id "g208.t1"; gene_id "g208";
NODE_2560_length_974926_cov_31.233547	AUGUSTUS	CDS	583334	583624	1	-	0	transcript_id "g208.t1"; gene_id "g208";
NODE_2560_length_974926_cov_31.233547	AUGUSTUS	CDS	583695	583865	1	-	0	transcript_id "g208.t1"; gene_id "g208";
NODE_2560_length_974926_cov_31.233547	AUGUSTUS	CDS	583934	584064	0.99	-	2	transcript_id "g208.t1"; gene_id "g208";
NODE_2560_length_974926_cov_31.233547	AUGUSTUS	CDS	584145	584659	1	-	1	transcript_id "g208.t1"; gene_id "g208";
NODE_2560_length_974926_cov_31.233547	AUGUSTUS	CDS	585047	587836	1	-	1	transcript_id "g208.t1"; gene_id "g208";
NODE_2560_length_974926_cov_31.233547	AUGUSTUS	CDS	588914	589395	1	-	0	transcript_id "g208.t1"; gene_id "g208";
[truncated: 178,844 more rows]
